# Supplementary material for: A visible light photoredox catalyzed carbon radical-mediated generation of ortho-quinone methides for 2,3-dihydrobenzofuran synthesis
Source: Royal Society of Chemistry journal article supplement (doi:10.1039/c9cc00727j), 2019-01-01

## Supporting Information for

### **A visible light photoredox catalyzed carbon radical-mediated generation of *o*-QMs for 2,3-dihydrobenzofuran synthesis**

Fan Zhou,<sup>a</sup> Ying Cheng,<sup>a</sup> Xiao-Peng Liu,<sup>a</sup> Jia-Rong Chen,<sup>a\*</sup> and Wen-Jing Xiao<sup>a,b</sup>

<sup>a</sup> Key Laboratory of Pesticide & Chemical Biology, Ministry of Education; International Joint Research Center for Intelligent Biosensing Technology and Health; College of Chemistry, Central China Normal University, 152 Luoyu Road, Wuhan, Hubei 430079, China.

<sup>b</sup> State Key Laboratory of Organometallic Chemistry, Shanghai Institute of Organic Chemistry, 345 Lingling Road, Shanghai 200032, China.

E-mail: chenjiarong@mail.ccnu.edu.cn

## Table of Contents

|                                                                                         |    |
|-----------------------------------------------------------------------------------------|----|
| 1. General Information .....                                                            | 1  |
| 2. Detailed Optimization of Reaction Conditions and Control Experiments .....           | 1  |
| 2.1 Optimization of Reaction Conditions .....                                           | 1  |
| 2.2 Control Experiments.....                                                            | 3  |
| 3. Experimental Procedure and Spectral Data of Products.....                            | 4  |
| 3.1 General Process.....                                                                | 4  |
| 3.2 Experimental Procedure of Reaction Using Sulfonium Bromide.....                     | 4  |
| 3.3 Experimental Procedure of Reaction Using Iodoacetonitrile as Radical Source.....    | 5  |
| 3.4 Experimental Procedure of Reaction Using (R)-BINOL-derived Chiral Sulfur Ylide..... | 5  |
| 3.5 Spectra Data of Products .....                                                      | 6  |
| 4. Synthetic Utility.....                                                               | 11 |
| 4.1 1.0 mmol Scale Experiment.....                                                      | 11 |
| 4.2 Sunlight-driven Reaction.....                                                       | 11 |
| 5. Mechanism Study.....                                                                 | 12 |
| 6. Spectra of Products.....                                                             | 13 |
| 7. Copy of HPLC Chromatograms.....                                                      | 54 |

## 1. General Information

Unless otherwise noted, materials were purchased from commercial suppliers and used without further purification. *fac*-Ir(4'-CF<sub>3</sub>-ppy)<sub>3</sub> was prepared according to literature.<sup>1</sup> The solvents used were treated by distillation over the drying agents. Flash column chromatography was performed using 200-300 mesh silica gel. <sup>1</sup>H NMR spectra were recorded on 400 or 600 MHz spectrophotometers. Chemical shifts are reported in delta (δ (ppm)) units in parts per million (ppm) relative to the singlet (0 ppm) for tetramethylsilane (TMS). Data are reported as follows: chemical shift, multiplicity (s = singlet, d = doublet, t = triplet, q = quartet, dd = doublet of doublets, m = multiplet), coupling constants (Hz) and integration. <sup>13</sup>C NMR spectra were recorded on Varian Mercury 400 (100 MHz) with complete proton decoupling spectrophotometers (CDCl<sub>3</sub>: 77.0 ppm). The high resolution mass spectra (HRMS) were measured on a Bruker ESI-O-TOF MS mass spectrometer. 2-Vinylphenols **1**,<sup>2</sup> sulfonium bromides **5** and sulfur ylides **2** were prepared according to previous reported procedures.<sup>3</sup>

## 2. Detailed Optimization of Reaction Conditions and Control Experiments

### 2.1 Optimization of Reaction Conditions

**Table S1.** Screen of the solvents

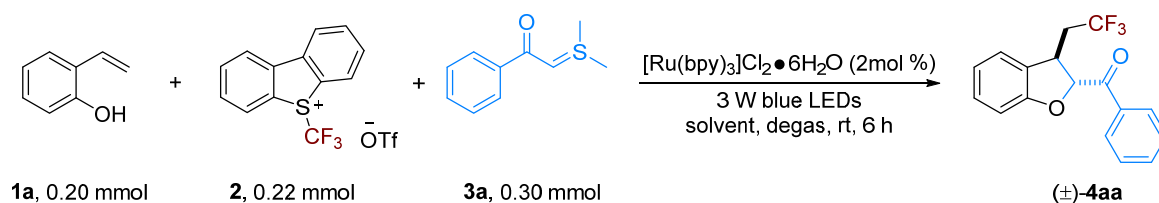

| Entry <sup>[a]</sup> | solvent                            | Yield <sup>[b]</sup> [%] |
|----------------------|------------------------------------|--------------------------|
| 1                    | CH <sub>2</sub> Cl <sub>2</sub>    | 36                       |
| 2                    | Toluene                            | 13                       |
| 3                    | DMF                                | 20                       |
| 4                    | CF <sub>3</sub> CH <sub>2</sub> OH | 42                       |

[a] Unless otherwise noted, reactions were carried out with **1a** (24.0 mg, 0.20 mmol), **2** (88.4 mg, 0.22 mmol), **3a** (54.0 mg, 0.30 mmol), [Ru(bpy)<sub>3</sub>]Cl<sub>2</sub>•6H<sub>2</sub>O (2 mol%) in solvent (2.0 mL) at rt under irradiation of 3 W blue LEDs. [b] Determined by <sup>1</sup>H NMR yield using 1,3,5-trimethoxybenzene as the internal standard.

As shown in *Table S1*, among all the solvents tested, CF<sub>3</sub>CH<sub>2</sub>OH gave the best results in terms of yield (42% yield), and was thus selected for further optimization studies.

**Table S2.** Screen of the photocatalysts

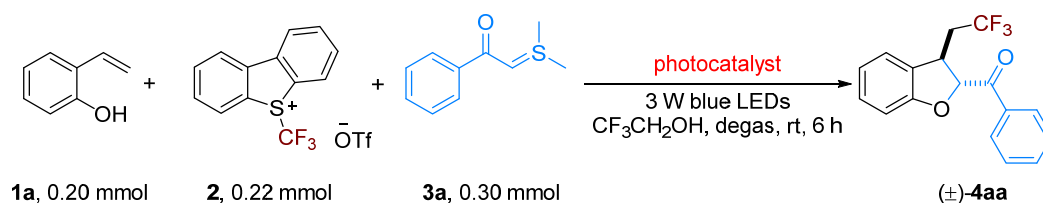

| Entry <sup>[a]</sup> | photocatalyst                                                     | Yield <sup>[b]</sup> [%] |
|----------------------|-------------------------------------------------------------------|--------------------------|
| 1                    | <i>fac</i> -Ir(ppy) <sub>3</sub>                                  | 51                       |
| 2                    | [Ru(bpz) <sub>3</sub> ]PF <sub>6</sub>                            | 49                       |
| 3                    | [Ir(dtbbpy)(ppy) <sub>2</sub> ]PF <sub>6</sub>                    | 57                       |
| 4                    | [Ir(dF(CF <sub>3</sub> ppy) <sub>2</sub> (dtbpy))]PF <sub>6</sub> | 60                       |
| <b>5</b>             | <b><i>fac</i>-Ir(4'-CF<sub>3</sub>-ppy)<sub>3</sub></b>           | <b>73</b>                |
| 6                    | Ir(4-Fppy) <sub>3</sub>                                           | 52                       |
| 7                    | Eosin Y                                                           | 53                       |
| 8                    | No photocatalyst                                                  | 45                       |

[a] Unless otherwise noted, reactions were carried out with **1a** (24.0 mg, 0.20 mmol), **2** (88.4 mg, 0.22 mmol), **3a** (54.0 mg, 0.30 mmol), photocatalyst (2 mol%) in CF<sub>3</sub>CH<sub>2</sub>OH (2.0 mL) at rt under irradiation of 3 W blue LEDs. [b] Determined by <sup>1</sup>HNMR yield using 1,3,5-trimethoxybenzene as the internal standard.

As shown in Table S2, among all the photocatalysts tested, *fac*-Ir(4'-CF<sub>3</sub>-ppy)<sub>3</sub> gave the best results in terms of yield (73% yield), and was thus selected for further optimization studies.

**Table S3. Screen of the additives**

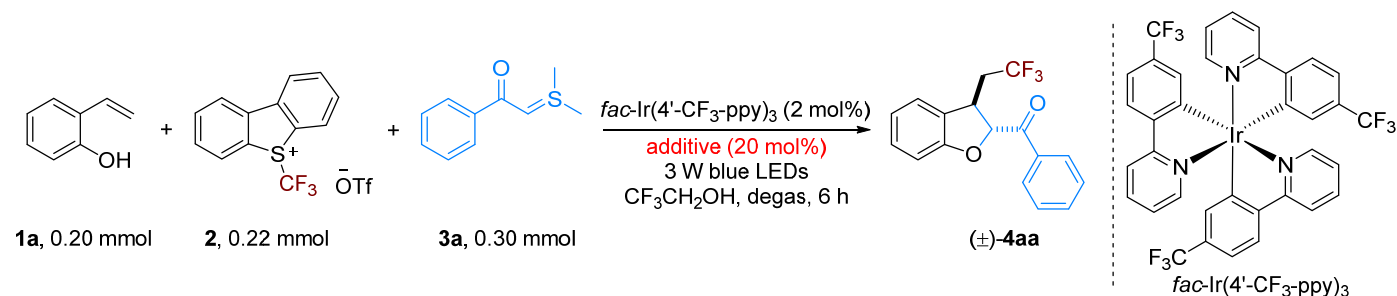

| Entry <sup>[a]</sup> | additive                     | Yield <sup>[b]</sup> [%] |
|----------------------|------------------------------|--------------------------|
| <b>1</b>             | <b>TFA</b>                   | <b>77</b>                |
| 2                    | TsOH                         | 47                       |
| 3                    | Isobutyric acid              | 30                       |
| 4                    | Pivalic acid                 | 70                       |
| 5                    | 1-Adamantane carboxylic acid | 55                       |
| 6                    | -                            | 73                       |

[a] Unless otherwise noted, reactions were carried out with **1a** (24.0 mg, 0.20 mmol), **2** (88.4 mg, 0.22 mmol), **3a** (54.0mg, 0.30 mmol), *fac*-Ir(4'-CF<sub>3</sub>-ppy)<sub>3</sub> (2 mol%), additive (20 mol%) in CF<sub>3</sub>CH<sub>2</sub>OH (2.0 mL) at rt under irradiation of 3 W blue LEDs. [b] Determined by <sup>1</sup>HNMR yield using 1,3,5-trimethoxybenzene as the internal standard.

As shown in Table S3, among all the additives tested, TFA gave the best result in terms of yield (77% yield), and was thus selected for further optimization studies.

**Table S4. Screen of the ratio of the substrates**

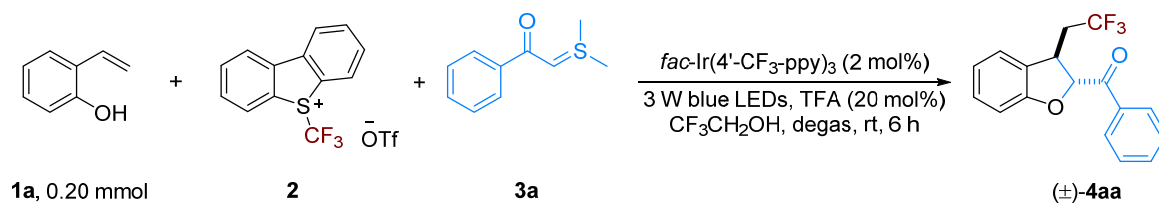

| Entry <sup>[a]</sup> | Equivalent of <b>2</b> | Equivalent of <b>3a</b> | Yield <sup>[b]</sup> [%] |
|----------------------|------------------------|-------------------------|--------------------------|
| 1                    | 1.1                    | 1.5                     | 77                       |
| 2                    | 1.5                    | 1.5                     | 66                       |
| 3                    | 2.0                    | 1.5                     | 62                       |
| <b>4</b>             | <b>1.1</b>             | <b>2.0</b>              | <b>81</b>                |
| 5                    | 1.1                    | 3.0                     | 62                       |

[a] Unless otherwise noted, reactions were carried out with **1a** (24.0 mg, 0.20 mmol), **2**, **3a**, *fac*-Ir(4'-CF<sub>3</sub>-ppy)<sub>3</sub> (2 mol%), TFA (20 mol%) in CF<sub>3</sub>CH<sub>2</sub>OH (2.0 mL) at rt under irradiation of 3 W blue LEDs. [b] Determined by <sup>1</sup>HNMR yield using 1,3,5-trimethoxybenzene as the internal standard.

As shown in Table S4, among all the conditions tested, 1.1 equivalent of **2**, 2.0 equivalent of **3a** gave the best results in terms of yield (81% yield), and was thus selected for further optimization studies.

## 2.2 Control Experiments

**Table S5. Control experiments**

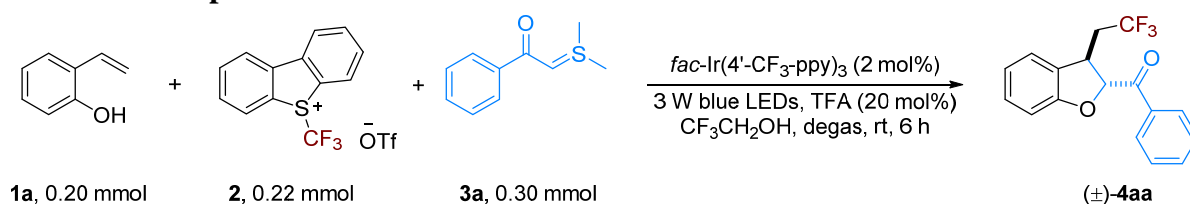

| Entry <sup>[a]</sup> | hν | photocatalyst | Yield <sup>[b]</sup> (%) |
|----------------------|----|---------------|--------------------------|
| 1                    | +  | +             | 75                       |
| 2                    | -  | +             | Trace                    |
| 3                    | +  | -             | 40                       |
| 4                    | -  | -             | No reaction              |

[a] Unless otherwise noted, reactions were carried out with **1a** (24.0 mg, 0.20 mmol), **2** (88.4 mg, 0.22 mmol), **3a** (54.0 mg, 0.30 mmol) *fac*-Ir(4'-CF<sub>3</sub>-ppy)<sub>3</sub> (2 mol%), TFA (20 mol%) in CF<sub>3</sub>CH<sub>2</sub>OH (2.0 mL) at rt under irradiation of 3 W blue LEDs. [b] Determined by isolated yield.

The results of Table S5 revealed that synthesis of **4aa** is indeed a photoredox catalysis process.

### 3. Experimental Procedure and Spectral Data of Products

#### 3.1 General Process

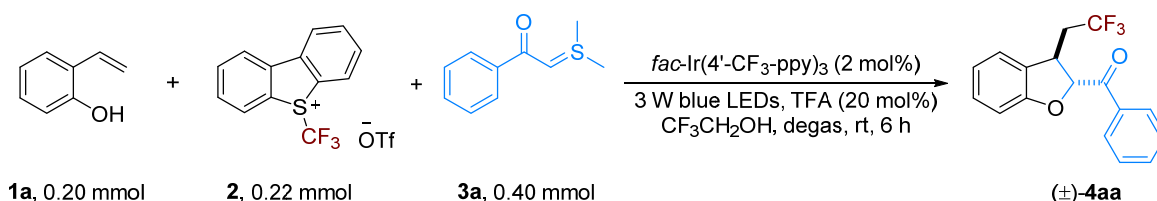

**1a** (24.0 mg, 0.20 mmol), **2** (88.4 mg, 0.22 mmol), **3a** (72.0 mg, 0.40 mmol), *fac*-Ir(4'-CF<sub>3</sub>-ppy)<sub>3</sub> (3.4 mg, 2 mol%), TFA (4.5 mg, 20 mol%) were dissolved in CF<sub>3</sub>CH<sub>2</sub>OH (2.0 mL). The resulting mixture was degassed by a “freeze-pump-thaw” procedure (3 times). Then, the mixture was stirred at 3 W blue LEDs at room temperature about 6 h until the reaction was completed, as monitored by TLC analysis. The crude product was purified by flash chromatography on silica gel (petroleum ether/ethyl acetate 200:1) directly to give the desired product **4aa** in 81% isolated yield as a white solid. Other products were prepared according to the above procedure.

#### 3.2 Experimental Procedure of Reaction Using Sulfonium Bromide

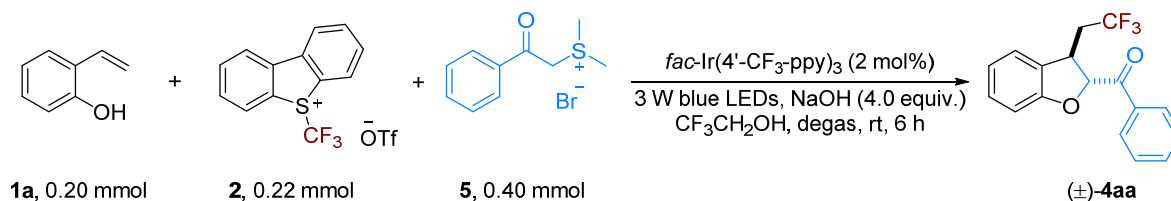

**1a** (24.0 mg, 0.20 mmol), **2** (88.4 mg, 0.22 mmol), **5** (104.0 mg, 0.40 mmol), NaOH (32.0 mg, 0.80 mmol), *fac*-Ir(4'-CF<sub>3</sub>-ppy)<sub>3</sub> (3.4 mg, 2 mol%), were dissolved in CF<sub>3</sub>CH<sub>2</sub>OH (2.0 mL). The resulting mixture was degassed by a “freeze-pump-thaw” procedure (3 times). Then, the mixture was stirred at 3 W blue LEDs at room temperature about 6 h until the reaction was completed, as monitored by TLC analysis. The crude product was purified by flash chromatography on silica gel (petroleum ether/ethyl acetate 200:1) directly to give the desired product **4aa** in 50% isolated yield as a white solid.

### 3.3 Experimental Procedure of Reaction Using Iodoacetonitrile as Radical Source

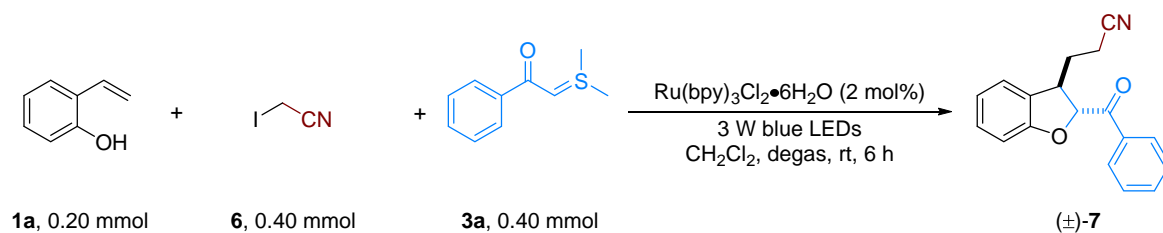

**1a** (24.0 mg, 0.20 mmol), **6** (66.8 mg, 0.40 mmol), **3a** (72.0 mg, 0.40 mmol), Ru(bpy)<sub>3</sub>Cl<sub>2</sub>·6H<sub>2</sub>O (3.0 mg, 2 mol%), were dissolved in CH<sub>2</sub>Cl<sub>2</sub> (2.0 mL). The resulting mixture was degassed by a “freeze-pump-thaw” procedure (3 times). Then, the mixture was stirred at 3 W blue LEDs at room temperature about 6 h until the reaction was completed, as monitored by TLC analysis. The crude product was purified by flash chromatography on silica gel (petroleum ether/ethyl acetate 200:1) directly to give the desired product **7** in 70% isolated yield as a yellow oil.

### 3.4 Experimental Procedure of Reaction Using (R)-BINOL-derived Chiral Sulfur Ylide

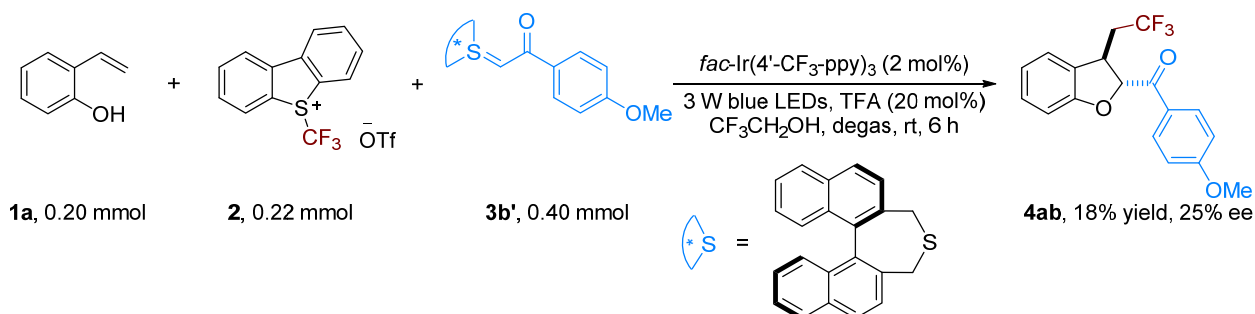

**1a** (24.0 mg, 0.20 mmol), **2** (88.4 mg, 0.22 mmol), **3b'** (92.1 mg, 0.40 mmol), *fac*-Ir(4'-CF<sub>3</sub>-ppy)<sub>3</sub> (3.4 mg, 2 mol%), TFA (4.5 mg, 20 mol%) were dissolved in CF<sub>3</sub>CH<sub>2</sub>OH (2.0 mL). The resulting mixture was degassed by a “freeze-pump-thaw” procedure (3 times). Then, the mixture was stirred at 3 W blue LEDs at room temperature about 6 h until the reaction was completed, as monitored by TLC analysis. The crude product was purified by flash chromatography on silica gel (petroleum ether/ethyl acetate 200:1) directly to give the desired product **4ab** in 18% isolated yield as a white solid.

### 3.5 Spectral Data of Products

#### Product 4aa

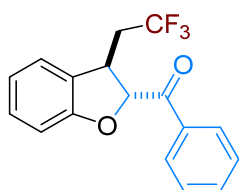

48 mg, white solid, yield: 80%.  $^1\text{H}$  NMR (400 MHz,  $\text{CDCl}_3$ )  $\delta$  (ppm) 8.10 (d,  $J = 8.4$  Hz, 2H), 7.63 (t,  $J = 7.2$  Hz, 1H), 7.52 (t,  $J = 7.2$  Hz, 2H), 7.23 (d,  $J = 7.6$  Hz, 1H), 7.19 (t,  $J = 7.6$  Hz, 1H), 6.95 (t,  $J = 7.6$  Hz, 1H), 6.83 (d,  $J = 8.0$  Hz, 1H), 5.70 (d,  $J = 5.2$  Hz, 1H), 4.46 – 4.41 (m, 1H), 2.75 – 2.64 (m, 1H), 2.58 – 2.49 (m, 1H).  $^{13}\text{C}$  NMR (100 MHz,  $\text{CDCl}_3$ )  $\delta$  (ppm) 193.5, 158.0, 134.7, 133.9, 129.5, 129.3, 128.7, 127.0, 126.0 (q,  $J = 275.9$  Hz), 124.5, 121.7, 110.1, 87.0, 38.9 (q,  $J = 27.7$  Hz), 37.4 (q,  $J = 2.6$  Hz).  $^{19}\text{F}$  NMR (376 MHz,  $\text{CDCl}_3$ )  $\delta$  (ppm) -64.14. HRMS (ESI) for:  $\text{C}_{17}\text{H}_{13}\text{F}_3\text{O}_2$   $[\text{M} + \text{H}]^+$ : calcd: 307.0940, found: 307.0950.

#### Product 4ab

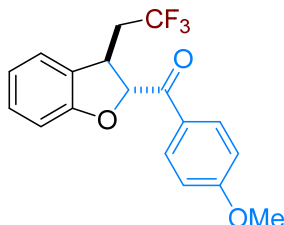

37 mg, white solid, yield: 55%. The ee was determined by chiral HPLC (Chiralpak AD-H, n-hexane/isopropanol 80:20 v/v, flow rate 1.0 mL/min,  $\lambda = 254$  nm, 25 °C). Retention times:  $R_t = 9.246$  min (major),  $R_t = 12.158$  min (minor). ee = 25%.  $^1\text{H}$  NMR (400 MHz,  $\text{CDCl}_3$ )  $\delta$  (ppm) 8.10 (d,  $J = 8.8$  Hz, 2H), 7.24 (d,  $J = 7.6$  Hz, 1H), 7.18 (t,  $J = 8.0$  Hz, 1H), 7.00 (d,  $J = 8.8$  Hz, 2H), 6.94 (t,  $J = 8.0$  Hz, 1H), 6.85 (d,  $J = 8.0$  Hz, 1H), 5.66 (d,  $J = 8.0$  Hz, 1H), 4.47 – 4.42 (m, 1H), 3.90 (s, 3H), 2.74 – 2.62 (m, 1H), 2.57 – 2.48 (m, 1H).  $^{13}\text{C}$  NMR (100 MHz,  $\text{CDCl}_3$ )  $\delta$  (ppm) 191.7, 164.1, 158.1, 131.9, 129.2, 127.6, 127.5 (q,  $J = 275.7$  Hz), 127.2, 124.5, 122.2, 121.6, 114.0, 110.0, 87.0, 55.5, 38.7 (q,  $J = 27.2$  Hz), 37.3 (q,  $J = 2.5$  Hz).  $^{19}\text{F}$  NMR (376 MHz,  $\text{CDCl}_3$ )  $\delta$  (ppm) -64.12. HRMS (ESI) for:  $\text{C}_{18}\text{H}_{15}\text{F}_3\text{O}_3$   $[\text{M} + \text{K}]^+$ : calcd: 375.0605, found: 375.0602.

#### Product 4ac

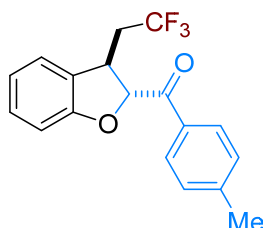

38 mg, white solid, yield: 60%.  $^1\text{H}$  NMR (400 MHz,  $\text{CDCl}_3$ )  $\delta$  (ppm) 8.00 (d,  $J = 8.4$  Hz, 2H), 7.32 (d,  $J = 8.0$  Hz, 2H), 7.24 (d,  $J = 7.6$  Hz, 1H), 7.20 (t,  $J = 8.0$  Hz, 1H), 6.94 (t,  $J = 7.2$  Hz, 1H), 6.85 (d,  $J = 8.0$  Hz, 1H), 5.68 (d,  $J = 5.2$  Hz, 1H), 4.45 – 4.40 (m, 1H), 2.71 – 2.63 (m, 1H), 2.57 – 2.48 (m, 1H), 2.44 (s, 3H).  $^{13}\text{C}$  NMR (100 MHz,  $\text{CDCl}_3$ )  $\delta$  (ppm) 193.1, 158.1, 144.9, 132.1, 129.6, 129.4, 129.2, 127.4 (q,  $J = 275.7$  Hz), 127.1, 124.5, 121.6, 110.1, 86.9, 39.0 (q,  $J = 27.7$  Hz), 37.3 (d,  $J = 2.3$  Hz), 21.7.  $^{19}\text{F}$  NMR (376 MHz,  $\text{CDCl}_3$ )  $\delta$  (ppm) -64.09. HRMS (ESI) for:  $\text{C}_{18}\text{H}_{15}\text{F}_3\text{O}_2$   $[\text{M} + \text{H}]^+$ : calcd: 321.1097, found: 321.1096.

#### Product 4ad

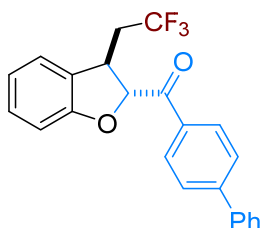

48 mg, white solid, yield: 63%.  $^1\text{H}$  NMR (400 MHz,  $\text{CDCl}_3$ )  $\delta$  (ppm) 8.18 (d,  $J = 8.4$  Hz, 2H), 7.75 (d,  $J = 8.4$  Hz, 2H), 7.65 (d,  $J = 7.2$  Hz, 2H), 7.50 – 7.46 (m, 2H), 7.43 – 7.39 (m, 1H), 7.25 (d,  $J = 7.2$  Hz, 1H), 7.19 (t,  $J = 8.0$  Hz, 1H), 6.95 (t,  $J = 7.2$  Hz, 1H), 6.87 (d,  $J = 8.0$  Hz, 1H), 5.72 (d,  $J = 4.8$  Hz, 1H), 4.50 – 4.45 (m, 1H), 2.75 – 2.64 (m, 1H), 2.59 – 2.50 (m, 1H).  $^{13}\text{C}$  NMR (100 MHz,  $\text{CDCl}_3$ )  $\delta$  (ppm) 193.1, 158.1, 146.5, 139.7, 133.3, 130.1, 129.3, 129.0, 128.4, 127.4, 127.3, 127.1, 126.1 (q,  $J = 275.9$  Hz), 124.5, 121.7, 110.1, 87.1, 38.9 (q,  $J = 27.7$  Hz), 37.32 (q,  $J = 2.7$  Hz).  $^{19}\text{F}$  NMR (376 MHz,  $\text{CDCl}_3$ )  $\delta$  (ppm) -64.09. HRMS (ESI) for:  $\text{C}_{23}\text{H}_{17}\text{F}_3\text{O}_2$   $[\text{M} + \text{H}]^+$ : calcd: 383.1253, found: 383.1255.



### Product 4ae

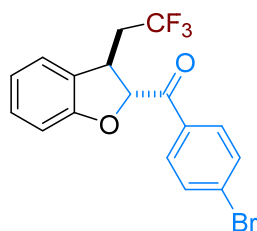

54 mg, white solid, yield: 71%.  $^1\text{H}$  NMR (400 MHz,  $\text{CDCl}_3$ )  $\delta$  (ppm) 7.90 – 7.87 (m, 2H), 7.60 – 7.56 (m, 2H), 7.17 (d,  $J$  = 7.6 Hz, 1H), 7.11 (t,  $J$  = 7.6 Hz, 1H), 6.88 (t,  $J$  = 7.6 Hz, 1H), 6.76 (d,  $J$  = 8.0 Hz, 1H), 5.55 (d,  $J$  = 5.2 Hz, 1H), 4.37 (m, 1H), 2.67 – 2.53 (m, 1H), 2.51 – 2.37 (m, 1H).  $^{13}\text{C}$  NMR (100 MHz,  $\text{CDCl}_3$ )  $\delta$  (ppm) 192.7, 157.8, 133.4, 132.1, 131.0, 129.4, 129.2, 126.9, 126.0 (q,  $J$  = 275.8 Hz), 124.5, 121.9, 110.1, 87.1, 38.9 (q,  $J$  = 27.8 Hz), 37.2 (q,  $J$  = 2.6 Hz).  $^{19}\text{F}$  NMR (376 MHz,  $\text{CDCl}_3$ )  $\delta$  (ppm) -64.17. HRMS (ESI) for:  $\text{C}_{17}\text{H}_{12}\text{BrF}_3\text{O}_2$   $[\text{M} + \text{H}]^+$ : calcd: 385.0046, found: 385.0042.

### Product 4af

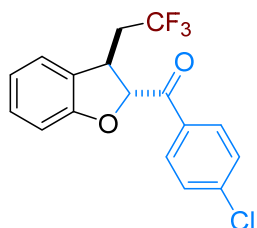

44 mg, white solid, yield: 65%.  $^1\text{H}$  NMR (400 MHz,  $\text{CDCl}_3$ )  $\delta$  (ppm) 8.05 (d,  $J$  = 8.8 Hz, 2H), 7.50 (d,  $J$  = 8.8 Hz, 2H), 7.25 (d,  $J$  = 7.6 Hz, 1H), 7.19 (t,  $J$  = 8.0 Hz, 1H), 6.96 (t,  $J$  = 7.2 Hz, 1H), 6.84 (d,  $J$  = 8.0 Hz, 1H), 5.63 (d,  $J$  = 5.2 Hz, 1H), 4.47 – 4.42 (m, 1H), 2.75 – 2.64 (m, 1H), 2.57 – 2.48 (m, 1H).  $^{13}\text{C}$  NMR (100 MHz,  $\text{CDCl}_3$ )  $\delta$  (ppm) 192.5, 157.8, 140.4, 132.9, 130.9, 129.3, 129.0, 127.4 (q,  $J$  = 276.1 Hz), 126.9, 124.5, 121.8, 110.1, 87.0, 38.7 (q,  $J$  = 27.7 Hz), 37.1 (q,  $J$  = 2.4 Hz).  $^{19}\text{F}$  NMR (376 MHz,  $\text{CDCl}_3$ )  $\delta$  (ppm) -64.20. HRMS (ESI) for:  $\text{C}_{17}\text{H}_{12}\text{ClF}_3\text{O}_2$   $[\text{M} + \text{H}]^+$ : calcd: 341.0551, found: 341.0558.

### Product 4ag

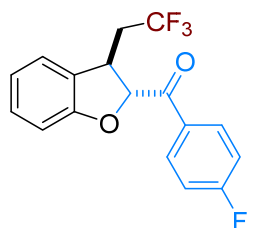

43 mg, white solid, yield: 66%.  $^1\text{H}$  NMR (400 MHz,  $\text{CDCl}_3$ )  $\delta$  (ppm) 8.16 – 8.11 (m, 2H), 7.25 (d,  $J$  = 7.6 Hz, 1H), 7.21 – 7.16 (m, 3H), 6.97 – 6.93 (m, 2H), 6.84 (d,  $J$  = 8.0 Hz, 1H), 5.64 (d,  $J$  = 5.2 Hz, 1H), 4.80 – 4.43 (m, 1H), 2.72 – 2.61 (m, 1H), 2.57 – 2.48 (m, 1H).  $^{13}\text{C}$  NMR (100 MHz,  $\text{CDCl}_3$ )  $\delta$  (ppm) 192.0, 166.2 (d,  $J$  = 254.8 Hz), 157.9, 132.3, 131.1, 129.3, 127.0, 126.0 (q,  $J$  = 275.8 Hz), 124.5, 121.8, 116.0, 110.1, 87.1, 38.9 (q,  $J$  = 27.7 Hz), 37.2 (q,  $J$  = 2.7 Hz).  $^{19}\text{F}$  NMR (376 MHz,  $\text{CDCl}_3$ )  $\delta$  (ppm) -64.20, -103.48. HRMS (ESI) for:  $\text{C}_{17}\text{H}_{12}\text{F}_4\text{O}_2$   $[\text{M} + \text{H}]^+$ : calcd: 325.0846, found: 325.0851.

### Product 4ah

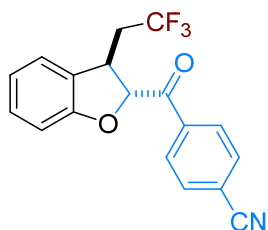

35 mg, white solid, yield: 53%.  $^1\text{H}$  NMR (400 MHz,  $\text{CDCl}_3$ )  $\delta$  (ppm) 8.19 (d,  $J$  = 8.4 Hz, 2H), 7.79 (d,  $J$  = 8.4 Hz, 2H), 7.26 (d,  $J$  = 7.2 Hz, 1H), 7.19 (t,  $J$  = 8.0 Hz, 1H), 6.97 (t,  $J$  = 7.2 Hz, 1H), 6.83 (d,  $J$  = 8.0 Hz, 1H), 5.65 (d,  $J$  = 5.2 Hz, 1H), 4.49 – 4.44 (m, 1H), 2.74 – 2.63 (m, 1H), 2.60 – 2.49 (m, 1H).  $^{13}\text{C}$  NMR (100 MHz,  $\text{CDCl}_3$ )  $\delta$  (ppm) 192.7, 157.5, 137.7, 132.4, 129.9, 129.4, 127.3 (q,  $J$  = 275.7 Hz), 126.6, 124.5, 122.0, 117.8, 116.9, 110.1, 87.1, 38.9 (q,  $J$  = 27.7 Hz), 37.1 (q,  $J$  = 2.3 Hz).  $^{19}\text{F}$  NMR (376 MHz,  $\text{CDCl}_3$ )  $\delta$  (ppm) -64.22. HRMS (ESI) for:  $\text{C}_{18}\text{H}_{12}\text{F}_3\text{NO}_2$   $[\text{M} + \text{Na}]^+$ : calcd: 354.0712, found: 354.0722.

### Product 4ai

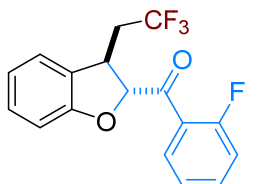

40 mg, white solid, yield: 62%.  $^1\text{H}$  NMR (400 MHz,  $\text{CDCl}_3$ )  $\delta$  (ppm) 7.82 – 7.78 (m, 1H), 7.61 – 7.56 (m, 1H), 7.28 – 7.16 (m, 4H), 6.94 – 6.90 (m, 1H), 6.85 (d,  $J$  = 8.0 Hz, 1H), 5.63 – 5.62 (m, 1H), 4.21 (dd,  $J$  = 11.2, 5.6 Hz, 1H), 2.66 – 2.56 (m, 2H).  $^{13}\text{C}$  NMR (100 MHz,  $\text{CDCl}_3$ )  $\delta$  (ppm) 193.6, 162.9 (d,  $J$  = 252.7 Hz), 158.4, 135.3 (d,  $J$  = 9.1 Hz), 131.3 (d,  $J$  = 2.9 Hz), 129.4, 126.7, 126.0 (q,  $J$  = 275.7 Hz), 124.8 (m), 123.6 (d,  $J$  = 13.5 Hz), 121.6, 116.7 (d,  $J$  = 23.2 Hz), 110.1, 89.7 (d,  $J$  = 16 Hz), 39.4

(q,  $J = 27.7$  Hz), 38.0 (q,  $J = 2.7$  Hz).  $^{19}\text{F}$  NMR (376 MHz,  $\text{CDCl}_3$ )  $\delta$  (ppm) -64.06, -109.65. HRMS (ESI) for:  $\text{C}_{17}\text{H}_{12}\text{F}_4\text{O}_2$  [ $\text{M} + \text{H}$ ] $^+$ : calcd: 325.0846, found: 325.0851.

### Product 4aj

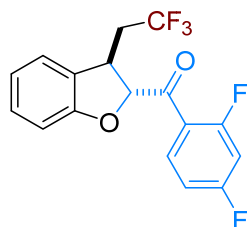

38 mg, white solid, yield: 58%.  $^1\text{H}$  NMR (400 MHz,  $\text{CDCl}_3$ )  $\delta$  (ppm) 7.88 – 7.82 (m, 1H), 7.22 (d,  $J = 7.6$  Hz, 1H), 7.18 (t,  $J = 8.0$  Hz, 1H), 7.01 – 6.91 (m, 3H), 6.84 (d,  $J = 8.0$  Hz, 1H), 5.58 (dd,  $J = 3.6$ , 2.4 Hz, 1H), 4.26 – 4.22 (m, 1H), 2.67 – 2.52 (m, 2H).  $^{13}\text{C}$  NMR (100 MHz,  $\text{CDCl}_3$ )  $\delta$  (ppm) 192.1 (d,  $J = 4.2$ , Hz), 167.6 (dd,  $J = 256.6$ , 12.4 Hz), 163.9 (dd,  $J = 255.9$ , 12.6 Hz), 158.2, 133.3 (dd,  $J = 10.6$ , 4.5 Hz), 129.4, 127.4 (q,  $J = 275.8$  Hz), 126.7, 124.8, 121.7, 120.2 (dd,  $J = 13.5$ , 3.5 Hz), 112.7 (dd,  $J = 21.5$ , 3.3 Hz), 110.1, 104.8 (dd,  $J = 27.0$ , 17.5 Hz), 89.5 (d,  $J = 5.9$  Hz), 39.4 (q,  $J = 27.7$  Hz), 37.8 (q,  $J = 2.6$  Hz).  $^{19}\text{F}$  NMR (376 MHz,  $\text{CDCl}_3$ )  $\delta$  (ppm) -64.15, -100.32, -104.81. HRMS

(ESI) for:  $\text{C}_{17}\text{H}_{11}\text{F}_5\text{O}_2$  [ $\text{M} + \text{Na}$ ] $^+$ : calcd: 365.0571, found: 365.0589.

### Product 4ak

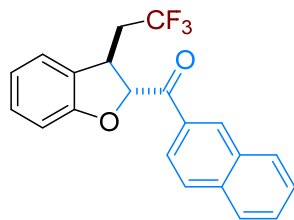

44 mg, white solid, yield: 62%.  $^1\text{H}$  NMR (400 MHz,  $\text{CDCl}_3$ )  $\delta$  (ppm) 8.66 (s, 1H), 8.11 (d,  $J = 8.8$  Hz, 1H), 8.01 (d,  $J = 8.0$  Hz, 1H), 7.91 (d,  $J = 8.8$  Hz, 1H), 7.88 (d,  $J = 8.0$  Hz, 1H), 7.65 – 7.53 (m, 2H), 7.25 (d,  $J = 7.2$  Hz, 1H), 7.19 (t,  $J = 7.6$  Hz, 1H), 6.95 (t,  $J = 7.6$  Hz, 1H), 6.87 (d,  $J = 8.0$  Hz, 1H), 5.86 (d,  $J = 4.8$  Hz, 1H), 4.53 – 4.48 (m, 1H), 2.77 – 2.66 (m, 1H), 2.64 – 2.53 (m, 1H).  $^{13}\text{C}$  NMR (100 MHz,  $\text{CDCl}_3$ )  $\delta$  (ppm) 193.4, 158.1, 135.9, 132.4, 131.9, 131.7, 129.8, 129.2, 128.9, 128.5, 127.8, 127.1, 126.8, 126.0 (q,  $J = 275.9$  Hz) 124.5, 124.4, 121.7, 110.1, 87.0,

38.9 (q,  $J = 27.7$  Hz), 37.4 (q,  $J = 2.7$  Hz).  $^{19}\text{F}$  NMR (376 MHz,  $\text{CDCl}_3$ )  $\delta$  (ppm) -64.09. HRMS (ESI) for:  $\text{C}_{21}\text{H}_{15}\text{F}_3\text{O}_2$  [ $\text{M} + \text{H}$ ] $^+$ : calcd: 357.1097, found: 357.1095.

### Product 4al

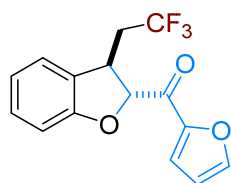

40 mg, white solid, yield: 68%.  $^1\text{H}$  NMR (400 MHz,  $\text{CDCl}_3$ )  $\delta$  (ppm) 7.69 – 7.68 (m, 1H), 7.47 (d,  $J = 3.6$  Hz, 1H), 7.24 – 7.19 (m, 2H), 6.97 – 6.93 (m, 1H), 6.91 (d,  $J = 8.0$  Hz, 1H), 6.60 (dd,  $J = 1.0$ , 0.8 Hz, 1H), 5.49 (d,  $J = 4.8$  Hz, 1H), 4.25 – 4.20 (m, 1H), 2.68 – 2.54 (m, 2H).  $^{13}\text{C}$  NMR (100 MHz,  $\text{CDCl}_3$ )  $\delta$  (ppm) 183.3, 158.4, 150.5, 147.7, 129.4, 127.3 (q,  $J = 275.8$  Hz), 126.7, 124.7, 121.8, 120.6, 112.6, 110.1, 87.1, 39.2 (q,  $J = 27.9$  Hz), 38.6 (q,  $J = 2.7$  Hz).  $^{19}\text{F}$  NMR (376 MHz,  $\text{CDCl}_3$ )  $\delta$  (ppm)

-64.01. HRMS (ESI) for:  $\text{C}_{15}\text{H}_{11}\text{F}_3\text{O}_3$  [ $\text{M} + \text{H}$ ] $^+$ : calcd: 297.0733, found: 297.0731.

### Product 4am

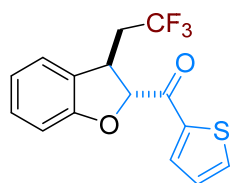

38 mg, colorless oil, yield: 61%.  $^1\text{H}$  NMR (400 MHz,  $\text{CDCl}_3$ )  $\delta$  (ppm) 8.04 (dd,  $J = 4.0$ , 1.2 Hz, 1H), 7.73 (dd,  $J = 4.8$ , 0.8 Hz, 1H), 7.25 – 7.17 (m, 3H), 6.98 – 6.94 (m, 1H), 6.91 (d,  $J = 8.0$  Hz, 1H), 5.44 (d,  $J = 5.2$  Hz, 1H), 4.35 – 4.30 (m, 1H), 2.68 – 2.52 (m, 2H).  $^{13}\text{C}$  NMR (100 MHz,  $\text{CDCl}_3$ )  $\delta$  (ppm) 188.1, 158.1, 140.7, 135.4, 134.6, 129.4, 128.3, 126.8, 126.0 (q,  $J = 275.8$  Hz), 124.7, 121.9, 110.2, 88.3, 39.0 (q,  $J = 27.8$  Hz), 38.7 (q,  $J = 2.7$  Hz).  $^{19}\text{F}$  NMR (376 MHz,  $\text{CDCl}_3$ )  $\delta$  (ppm) -63.93. HRMS

(ESI) for:  $\text{C}_{15}\text{H}_{11}\text{F}_3\text{O}_2\text{S}$  [ $\text{M} + \text{Na}$ ] $^+$ : calcd: 335.0324, found: 335.0325.

### Product 4ba

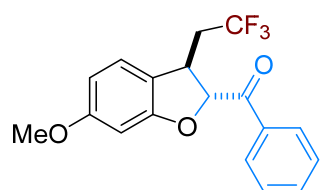

27 mg, yellow oil, yield: 41%.  $^1\text{H}$  NMR (400 MHz,  $\text{CDCl}_3$ )  $\delta$  (ppm) 8.08 (d,  $J = 7.6$  Hz, 2H) 7.63 (t,  $J = 7.2$  Hz, 1H), 7.51 (t,  $J = 7.6$  Hz, 2H), 7.11 (d,  $J = 8.4$  Hz, 1H), 6.50 (dd,  $J = 8.4$ , 2.0 Hz, 1H), 6.44 (d,  $J = 2.0$  Hz, 1H), 5.70 (d,  $J = 5.2$  Hz, 1H), 4.34 – 4.29 (m, 1H), 3.75 (s, 1H), 2.66 – 2.47 (m, 2H).  $^{13}\text{C}$  NMR (100 MHz,  $\text{CDCl}_3$ )  $\delta$  (ppm) 193.7, 161.2, 159.4, 134.6, 133.9, 129.4, 128.7, 127.4 (q,  $J = 276.0$  Hz) 124.7, 118.8, 107.6, 96.5, 87.9, 55.5, 39.3 (q,  $J = 27.4$  Hz), 37.0 (q,  $J = 2.5$  Hz).  $^{19}\text{F}$  NMR (376 MHz,  $\text{CDCl}_3$ )  $\delta$  (ppm) -64.09. HRMS (ESI) for:  $\text{C}_{18}\text{H}_{15}\text{F}_3\text{O}_3$   $[\text{M} + \text{H}]^+$ : calcd: 337.1046, found: 337.1042.

### Product 4ca

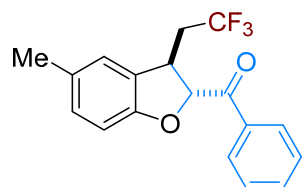

41 mg, white solid, yield: 64%.  $^1\text{H}$  NMR (400 MHz,  $\text{CDCl}_3$ )  $\delta$  (ppm) 8.09 – 8.06 (m, 2H), 7.63 – 7.59 (m, 1H), 7.52 – 7.48 (m, 2H), 7.03 (s, 1H), 6.98 – 6.96 (d,  $J = 8.0$  Hz, 1H), 6.73 – 6.71 (d,  $J = 8.0$  Hz, 1H), 5.67 – 5.66 (d,  $J = 5.6$  Hz, 1H), 4.40 – 4.35 (m, 1H), 2.69 – 2.60 (m, 1H), 2.55 – 2.46 (m, 1H), 2.29 (s, 3H).  $^{13}\text{C}$  NMR (100 MHz,  $\text{CDCl}_3$ )  $\delta$  (ppm) 193.7, 156.0, 134.7, 133.8, 131.1, 129.7, 129.4, 128.7, 127.0, 126.1 (q,  $J = 275.8$  Hz), 124.9, 109.6, 87.1, 38.9 (q,  $J = 27.6$  Hz), 37.4 (q,  $J = 2.7$  Hz), 20.8.  $^{19}\text{F}$  NMR (376 MHz,  $\text{CDCl}_3$ )  $\delta$  (ppm) -64.2. HRMS (ESI) for:  $\text{C}_{18}\text{H}_{15}\text{F}_3\text{O}_2$   $[\text{M} + \text{Na}]^+$ : calcd: 343.0916, found: 343.0900.

### Product 4da

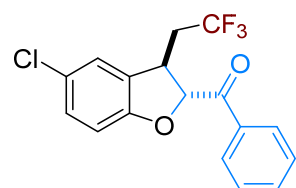

43 mg, white solid, yield: 63%.  $^1\text{H}$  NMR (400 MHz,  $\text{CDCl}_3$ )  $\delta$  (ppm) 8.01 – 7.99 (m, 2H), 7.58 (t,  $J = 7.6$  Hz, 1H), 7.47 (t,  $J = 7.6$  Hz, 1H), 7.13 (s, 1H), 7.08 (dd,  $J = 8.4$ , 2.0 Hz, 1H), 6.70 – 6.68 (d,  $J = 8.4$  Hz, 1H), 5.66 – 5.64 (d,  $J = 5.2$  Hz, 1H), 4.37 – 4.33 (m, 1H), 2.64 – 2.54 (m, 1H), 2.52 – 2.42 (m, 1H).  $^{13}\text{C}$  NMR (100 MHz,  $\text{CDCl}_3$ )  $\delta$  (ppm) 193.0, 156.7, 134.3, 134.0, 129.4, 129.2, 128.9, 128.7, 126.5, 125.8 (q,  $J = 275.9$  Hz), 124.7, 111.1, 87.3, 38.6 (q,  $J = 27.9$  Hz), 37.3 (q,  $J = 2.7$  Hz).  $^{19}\text{F}$  NMR (376 MHz,  $\text{CDCl}_3$ )  $\delta$  (ppm) -64.10. HRMS (ESI) for:  $\text{C}_{17}\text{H}_{12}\text{ClF}_3\text{O}_2$   $[\text{M} + \text{Na}]^+$ : calcd: 363.0370, found: 363.0380.

### Product 4ea

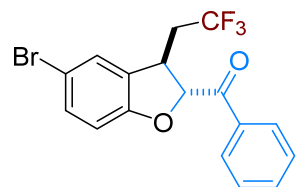

52 mg, white solid, yield: 68%.  $^1\text{H}$  NMR (400 MHz,  $\text{CDCl}_3$ )  $\delta$  (ppm) 8.00 – 7.98 (m, 2H), 7.58 – 7.54 (m, 1H), 7.46 – 7.43 (m, 2H), 7.27 (s, 1H), 7.20 (dd,  $J = 8.4$ , 2.0 Hz, 1H), 6.65 (d,  $J = 8.4$  Hz, 1H), 5.65 (d,  $J = 5.6$  Hz, 1H), 4.38 – 4.33 (m, 1H), 2.61 – 2.54 (m, 1H), 2.51 – 2.42 (m, 1H).  $^{13}\text{C}$  NMR (100 MHz,  $\text{CDCl}_3$ )  $\delta$  (ppm) 192.9, 157.2, 134.4, 134.0, 132.2, 129.5, 129.4, 128.8, 127.6, 125.8 (q,  $J = 275.8$  Hz) 113.5, 111.7, 87.3, 38.7 (q,  $J = 27.6$  Hz), 37.3 (q,  $J = 2.7$  Hz).  $^{19}\text{F}$  NMR (376 MHz,  $\text{CDCl}_3$ )  $\delta$  (ppm) -64.12. HRMS (ESI) for:  $\text{C}_{17}\text{H}_{12}\text{BrF}_3\text{O}_2$   $[\text{M} + \text{Na}]^+$ : calcd: 406.9865, found: 406.9882.

### Product 4fa

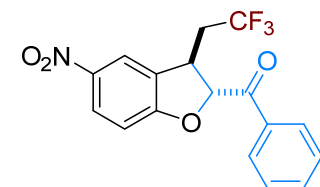

14 mg, white solid, yield: 20%.  $^1\text{H}$  NMR (400 MHz,  $\text{CDCl}_3$ )  $\delta$  (ppm) 8.12 (m, 2H), 8.02 (d,  $J = 7.6$  Hz, 2H), 7.61 (t,  $J = 7.2$  Hz, 1H), 7.48 (t,  $J = 7.6$  Hz, 2H), 6.87 – 6.84 (m, 1H), 5.86 (d,  $J = 5.2$  Hz, 1H), 4.48 – 4.43 (m, 1H), 2.71 – 2.61 (m, 1H), 2.58 – 2.49 (m, 1H).  $^{13}\text{C}$  NMR (100 MHz,  $\text{CDCl}_3$ )  $\delta$  (ppm) 191.9, 163.1, 142.9, 134.4, 134.0, 129.5, 128.9, 128.7 (q,  $J = 276.0$  Hz), 127.0, 126.7, 121.1, 110.2, 88.2, 38.7 (q,  $J = 28.2$  Hz), 36.8 (q,  $J = 2.6$  Hz).  $^{19}\text{F}$  NMR (376

MHz, CDCl<sub>3</sub>)  $\delta$  (ppm) -63.97. HRMS (ESI) for: C<sub>17</sub>H<sub>12</sub>F<sub>3</sub>NO<sub>4</sub> [M + Na]<sup>+</sup>: calcd: 374.0611, found: 374.0617.

#### Product 4ga

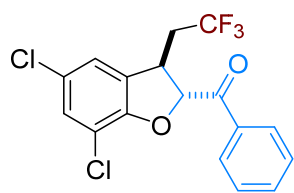

43 mg, white solid, yield: 58%. <sup>1</sup>H NMR (400 MHz, CDCl<sub>3</sub>)  $\delta$  (ppm) 8.03 – 8.00 (m, 2H), 7.58 – 7.54 (m, 1H), 7.45 (t, *J* = 8.0 Hz, 2H), 7.12 (d, *J* = 2.0 Hz, 1H), 7.03 (s, 1H), 5.72 (d, *J* = 5.2 Hz, 1H), 4.43 – 4.38 (m, 1H), 2.60 – 2.44 (m, 2H). <sup>13</sup>C NMR (100 MHz, CDCl<sub>3</sub>)  $\delta$  (ppm) 192.5, 153.1, 134.2, 134.2, 130.1, 129.5, 129.3, 128.8, 127.1 (q, *J* = 275.8 Hz), 126.9, 123.2, 116.3, 87.7, 38.7 (q, *J* = 28.2 Hz), 38.3 (q, *J* = 2.6 Hz). <sup>19</sup>F NMR (376 MHz, CDCl<sub>3</sub>)  $\delta$  (ppm) -64.05. HRMS (ESI)

for: C<sub>17</sub>H<sub>11</sub>F<sub>3</sub>O<sub>3</sub> [M + Na]<sup>+</sup>: calcd: 396.9980, found: 396.9976.

#### Product 4ha

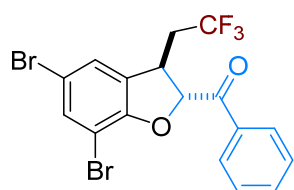

46 mg, white solid, yield: 61%. <sup>1</sup>H NMR (400 MHz, CDCl<sub>3</sub>)  $\delta$  (ppm) 8.10 (d, *J* = 7.6 Hz, 2H), 7.63 (t, *J* = 7.2 Hz, 1H), 7.52 (t, *J* = 7.6 Hz, 2H), 7.47 (s, 1H), 7.28 (s, 1H), 5.78 (d, *J* = 7.2 Hz, 1H), 4.53 – 4.48 (m, 1H), 2.67 – 2.51 (m, 2H). <sup>13</sup>C NMR (100 MHz, CDCl<sub>3</sub>)  $\delta$  (ppm) 192.5, 155.0, 134.6, 134.2, 134.1, 130.1, 129.5, 128.8, 126.6, 125.7 (q, *J* = 275.8 Hz), 113.8, 103.9, 87.4, 38.6 (q, *J* = 28.2 Hz), 38.5 (q, *J* = 2.7 Hz). <sup>19</sup>F NMR (376 MHz, CDCl<sub>3</sub>)  $\delta$  (ppm) -64.04. HRMS (ESI)

for: C<sub>17</sub>H<sub>11</sub>Br<sub>2</sub>F<sub>3</sub>O<sub>3</sub> [M + K]<sup>+</sup>: calcd: 500.8709, found: 500.8704.

#### Product 7

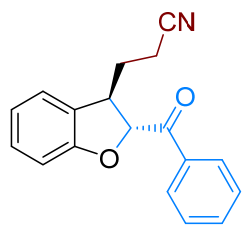

39 mg, yellow oil, yield: 70%. <sup>1</sup>H NMR (400 MHz, CDCl<sub>3</sub>)  $\delta$  (ppm) 8.04 (d, *J* = 7.6 Hz, 2H), 7.62 (t, *J* = 7.6 Hz, 1H), 7.51 (t, *J* = 7.6 Hz, 2H), 7.22 – 7.17 (m, 2H), 6.95 (t, *J* = 7.2 Hz, 1H), 6.90 (d, *J* = 8.4 Hz, 1H), 5.53 (d, *J* = 5.2 Hz, 1H), 4.04 (q, *J* = 6.0 Hz, 1H), 2.55 – 2.37 (m, 2H), 2.31 – 2.12 (m, 2H). <sup>13</sup>C NMR (100 MHz, CDCl<sub>3</sub>)  $\delta$  (ppm) 195.4, 158.6, 134.3, 133.9, 129.3, 129.3, 128.8, 126.9, 124.4, 121.6, 119.0, 110.3, 88.0, 43.1, 30.5, 14.5. IR (in KBr): 1688, 1596, 1478, 1461, 1448, 1221, 751, 691 cm<sup>-1</sup>. HRMS (ESI) for: C<sub>18</sub>H<sub>15</sub>NO<sub>2</sub> [M + Na]<sup>+</sup>: calcd: 300.0995, found: 300.0998.

#### References:

- [1] A. Singh, K. Teegardin, M. Kelly, K. S. Prasad, S. Krishnan, J. D. Weaver, *J. Organomet. Chem.* 2014, **776**, 51-59.
- [2] a) V. Hirschbeck, P. H. Gehrtz and I. Fleischer, *Chem. - Eur. J.* 2018, **24**, 7092-7107.; b) P. Liu, S. Zou, B. Yu, L. Li and H. Huang, *Org. Lett.* 2018, **20**, 3601-3604. c) H. Konishi, T. Ueda, T. Muto, and K. Manabe, *Org. Lett.* 2012, **14**, 4722. d) F. Yang, K. Rauch, K. Kettelhoit and L. Ackermann, *Angew. Chem. Int. Ed.* 2014, **53**, 11285-11288.
- [3] Y.-Y. Liu, X.-Y. Yu, J.-R. Chen, M.-M. Qiao, X. Qi, D.-Q. Shi and W.-J. Xiao, *Angew. Chem. Int. Ed.*, 2017, **56**, 9527-9531.

## 4. Synthetic Utility

### 4.1 1.0 mmol Scale Reaction

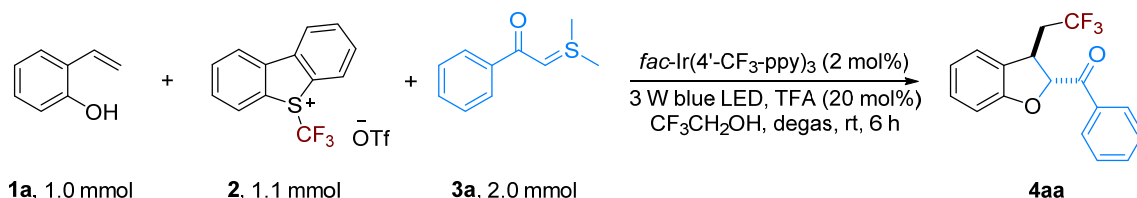

**1a** (120.0 mg, 1.0 mmol), **2** (440.0 mg, 1.1 mmol), **3a** (360.0 mg, 2.0 mmol), *fac*-Ir(4'-CF<sub>3</sub>-ppy)<sub>3</sub> (17.2 mg, 2 mol%), TFA (22.8 mg, 20 mol%) were dissolved in CF<sub>3</sub>CH<sub>2</sub>OH (10 mL). The resulting mixture was degassed by a “freeze-pump-thaw” procedure (3 times). Then, the resulting mixture was stirred at 3 W blue LEDs at rt about 6 h until the reaction was completed, as monitored by TLC analysis. The crude product was purified by flash chromatography on silica gel (petroleum ether/ethyl acetate 200:1) directly to give the desired product **4aa** in 76% isolated yield as a white solid.

### 4.2 Sunlight-driven Reaction

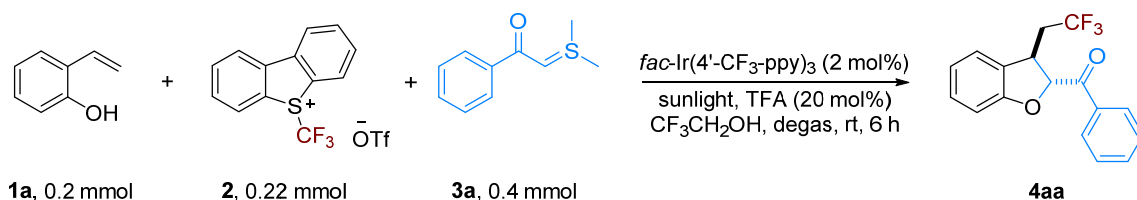

**1a** (24.0 mg, 0.2 mmol), **2** (88.0 mg, 0.22 mmol), **3a** (72.0 mg, 0.4 mmol), *fac*-Ir(4'-CF<sub>3</sub>-ppy)<sub>3</sub> (3.4 mg, 2 mol%), TFA (4.5 mg, 20 mol%) were dissolved in CF<sub>3</sub>CH<sub>2</sub>OH (2 mL). The resulting mixture was degassed by a “freeze-pump-thaw” procedure (3 times). Then, the resulting mixture was stirred at 3 W blue LEDs at rt about 6 h until the reaction was completed, as monitored by TLC analysis. The crude product was purified by flash chromatography on silica gel (petroleum ether/ethyl acetate 200:1) directly to give the desired product **4aa** in 57% isolated yield as a white solid.

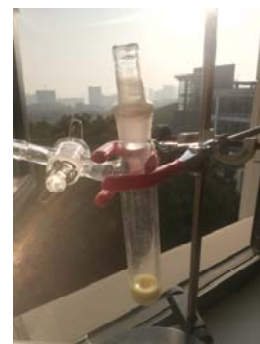

## 5. Mechanism Study

### TEMPO Trapping Experiment

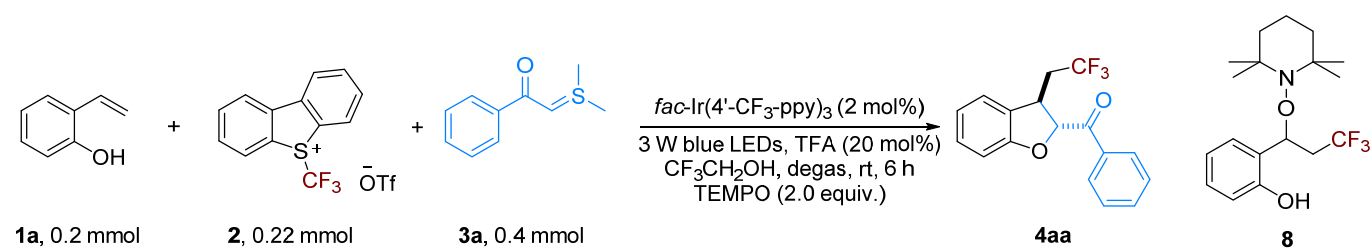

**1a** (24.0 mg, 0.20 mmol), **2** (88.4 mg, 0.22 mmol), **3a** (72.0 mg, 0.4 mmol), *fac*-Ir(4'-CF<sub>3</sub>-ppy)<sub>3</sub> (3.4 mg, 2 mol%), TFA (4.5 mg, 20 mol%), TEMPO (62.4 mg, 2.0 equiv.) were dissolved in CF<sub>3</sub>CH<sub>2</sub>OH (2.0 mL). The resulting mixture was degassed by a “freeze-pump-thaw” procedure (3 times). Then, the mixture was stirred at 3 W blue LEDs at room temperature about 6 h. The crude product was purified by flash chromatography on silica gel (petroleum ether/ethyl acetate 200:1) directly to give the desired product **4aa** in 28% isolated yield as a white solid. The TEMPO trapped intermediate **8** was detected by HRMS. HRMS (ESI) for: (C<sub>18</sub>H<sub>26</sub>F<sub>3</sub>NO<sub>2</sub>) [M + H]<sup>+</sup> calcd: 346.1988, found: 346.1991.

### BHT Trapping Experiment

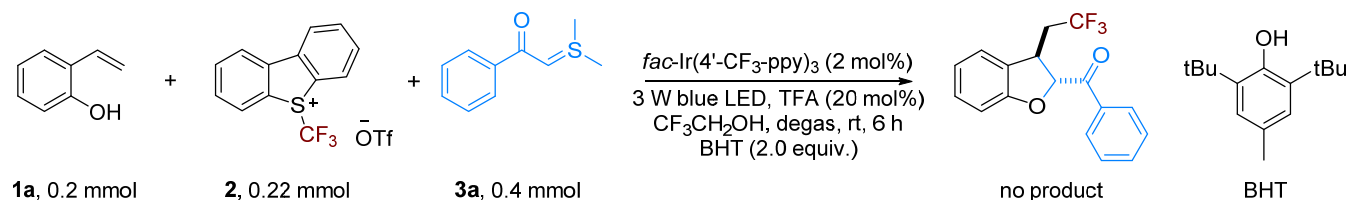

**1a** (24.0 mg, 0.20 mmol), **2** (88.4 mg, 0.22 mmol), **3a** (72.0 mg, 0.4 mmol), *fac*-Ir(4'-CF<sub>3</sub>-ppy)<sub>3</sub> (3.4 mg, 2 mol%), TFA (4.5 mg, 20 mol%), BHT (88.1 mg, 2.0 equiv.) were dissolved in CF<sub>3</sub>CH<sub>2</sub>OH (2.0 ml). The resulting mixture was degassed by a “freeze-pump-thaw” procedure (3 times). Then, the mixture was stirred at 3 W blue LEDs at room temperature about 6 h. No desired product **4aa** can be detected.

## 6. Spectra of Products

$^1\text{H}$  NMR (400 MHz,  $\text{CDCl}_3$ ),  $^{13}\text{C}$  NMR (100 MHz,  $\text{CDCl}_3$ ) and  $^{19}\text{F}$  NMR (376 MHz,  $\text{CDCl}_3$ ) spectra of product 4aa

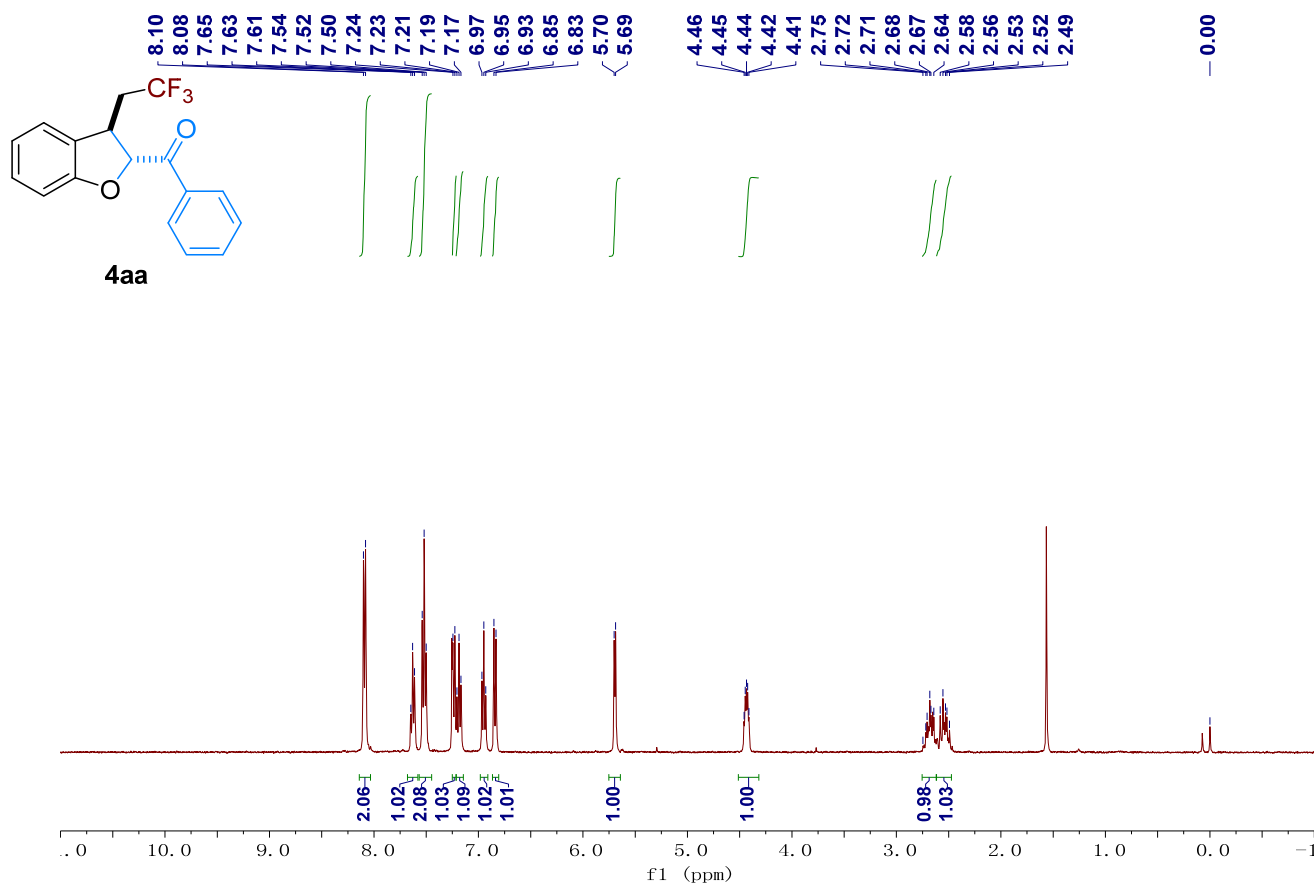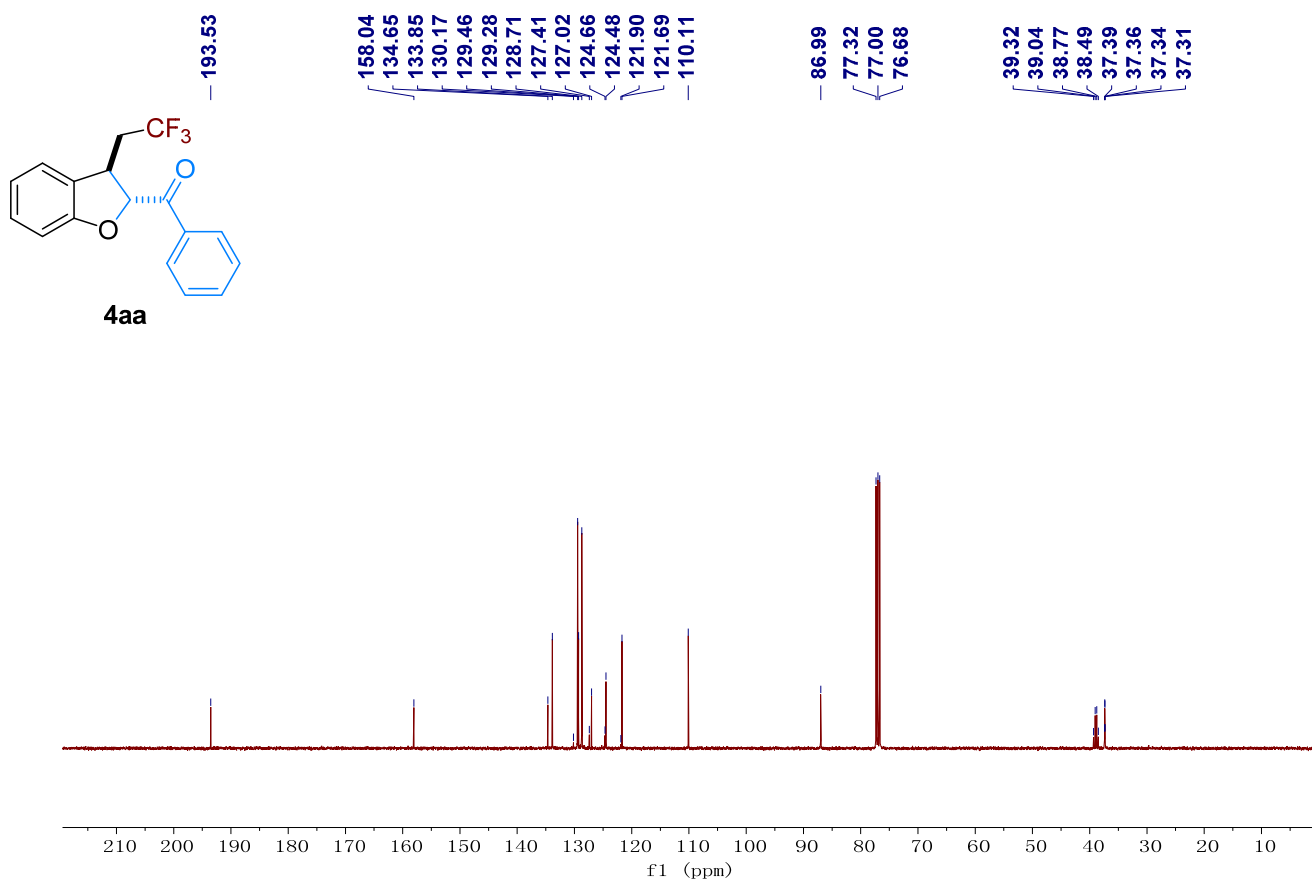

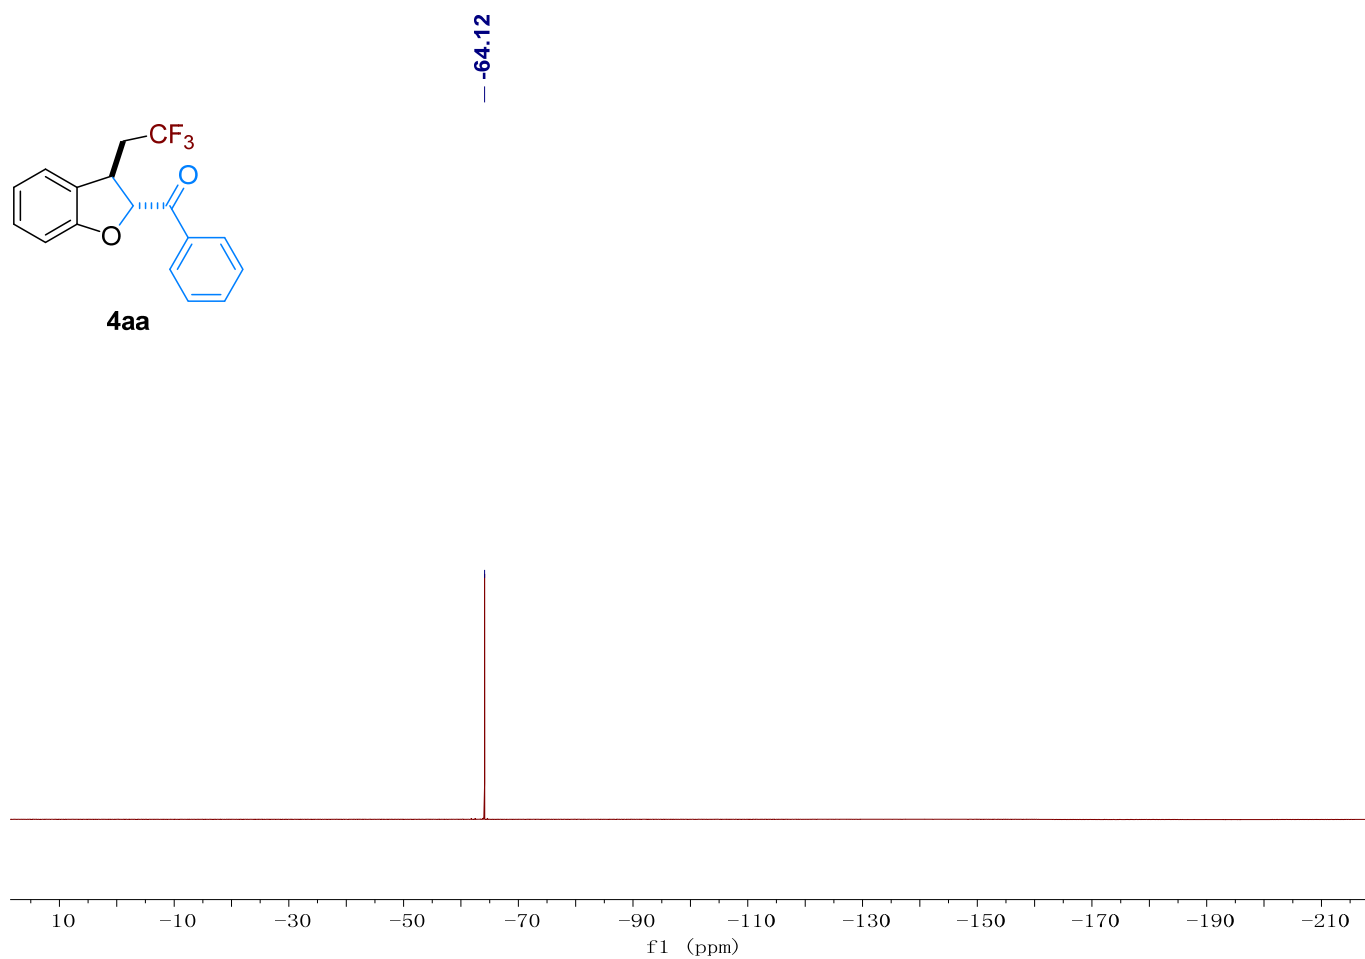



$^1\text{H}$  NMR (400 MHz,  $\text{CDCl}_3$ ),  $^{13}\text{C}$  NMR (100 MHz,  $\text{CDCl}_3$ ) and  $^{19}\text{F}$  NMR (376 MHz,  $\text{CDCl}_3$ ) spectra of product 4ab

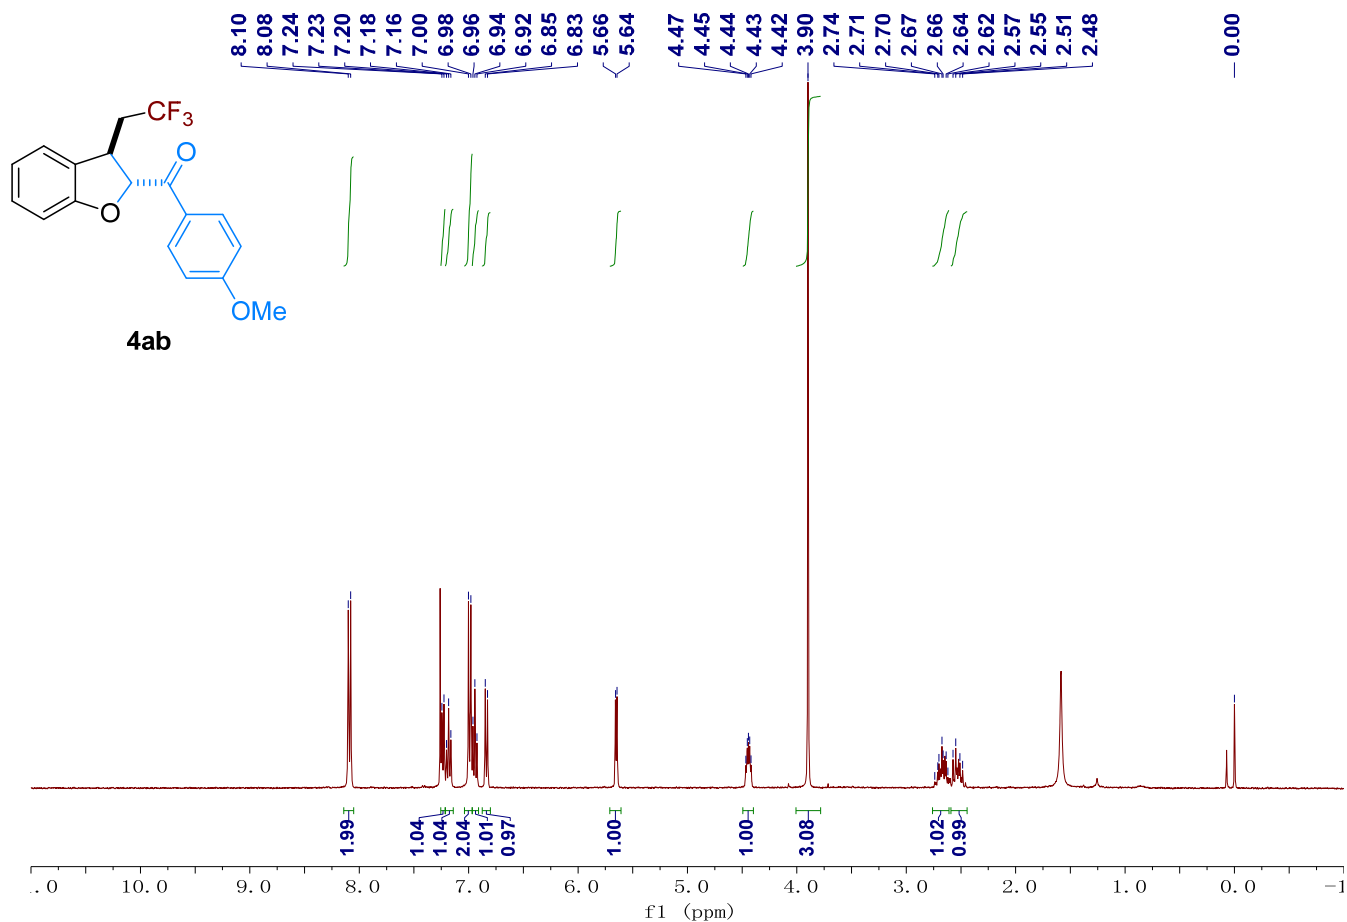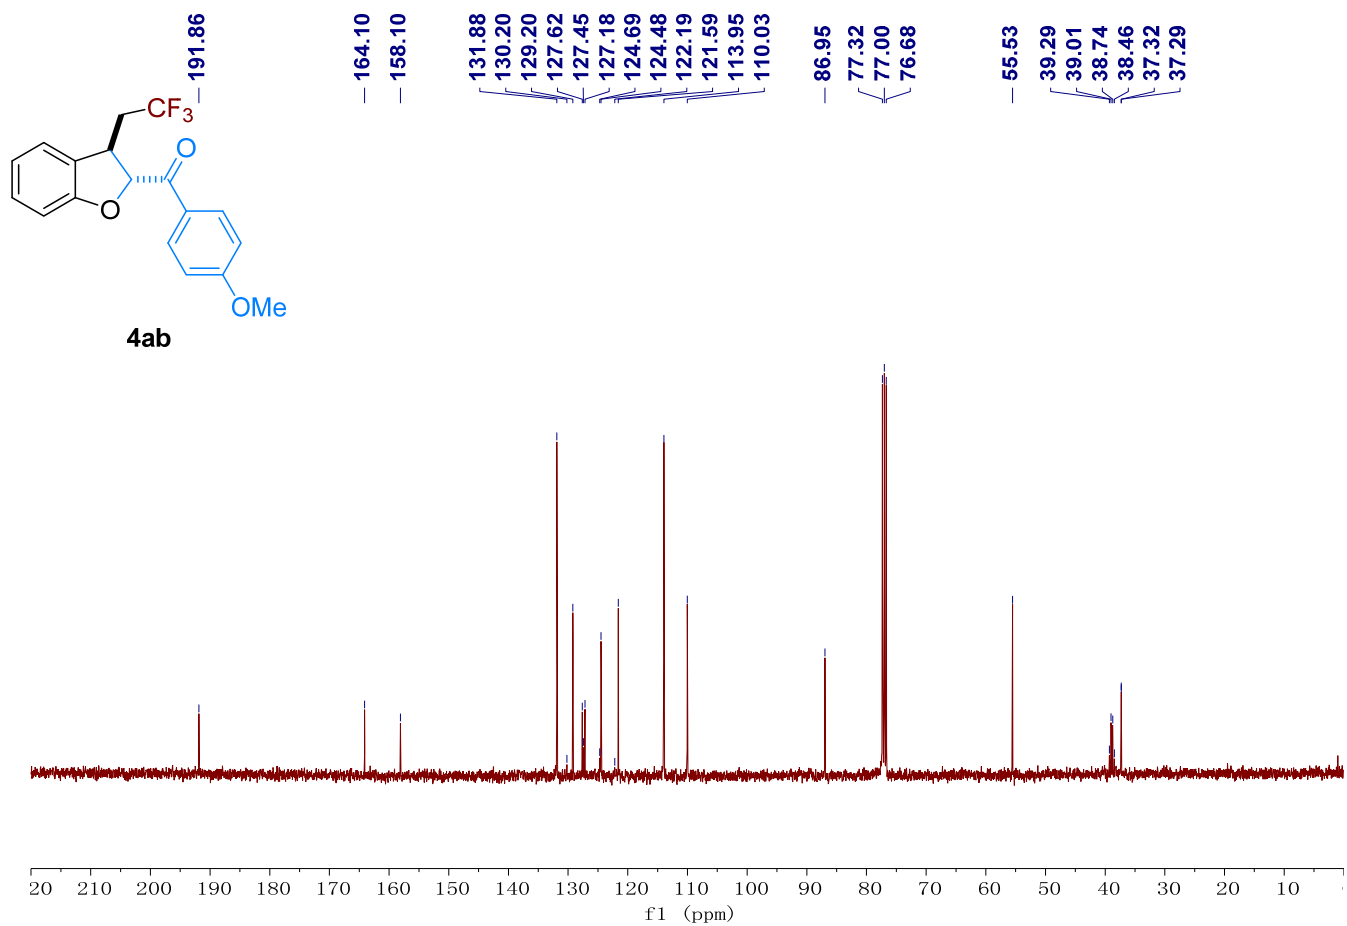

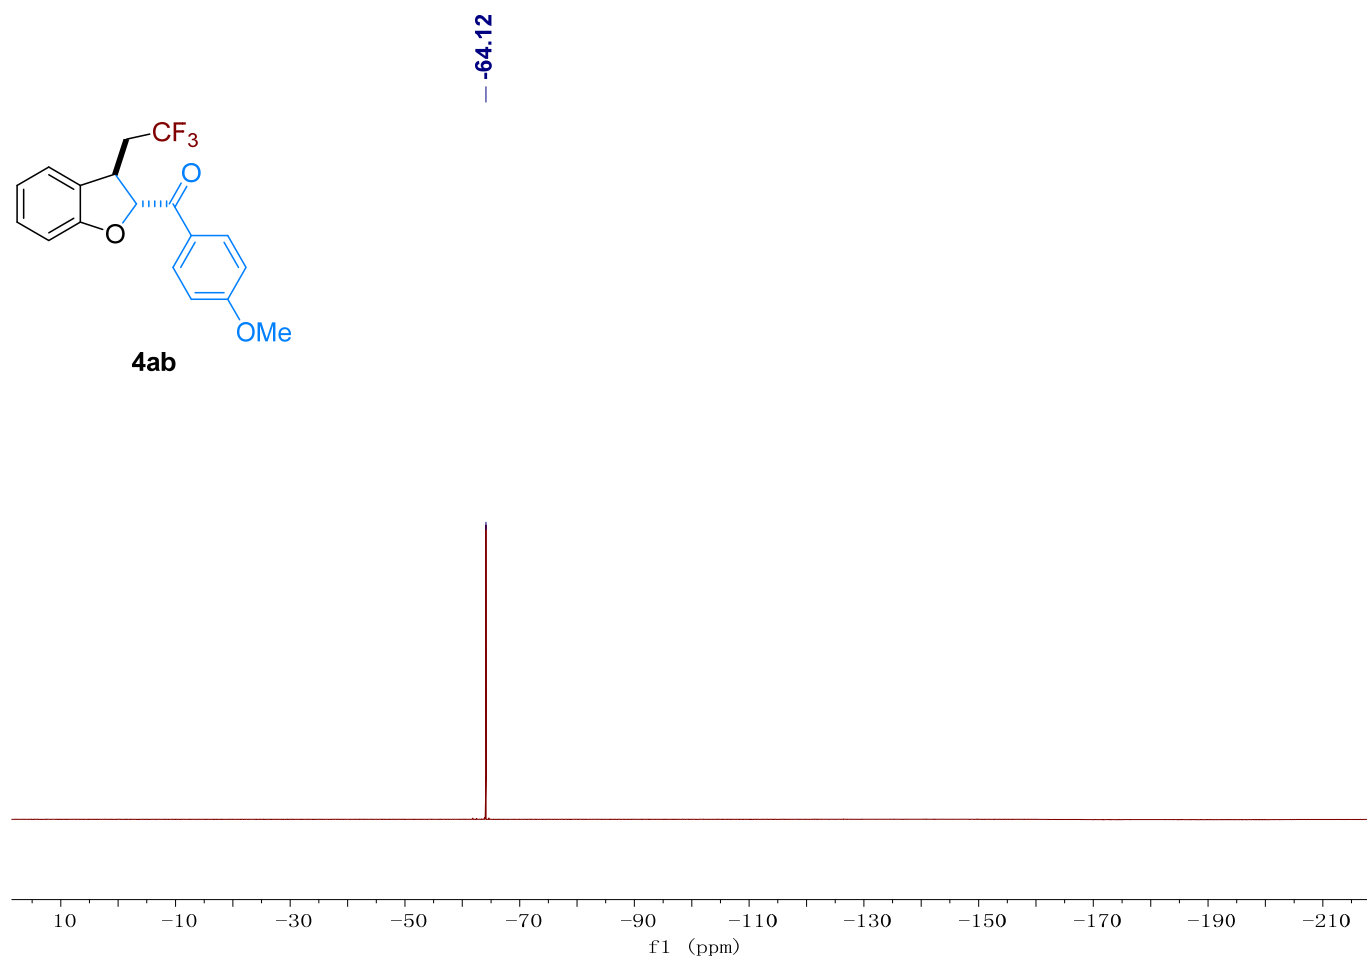

$^1\text{H}$  NMR (400 MHz,  $\text{CDCl}_3$ ),  $^{13}\text{C}$  NMR (100 MHz,  $\text{CDCl}_3$ ) and  $^{19}\text{F}$  NMR (376 MHz,  $\text{CDCl}_3$ ) spectra of product 4ac

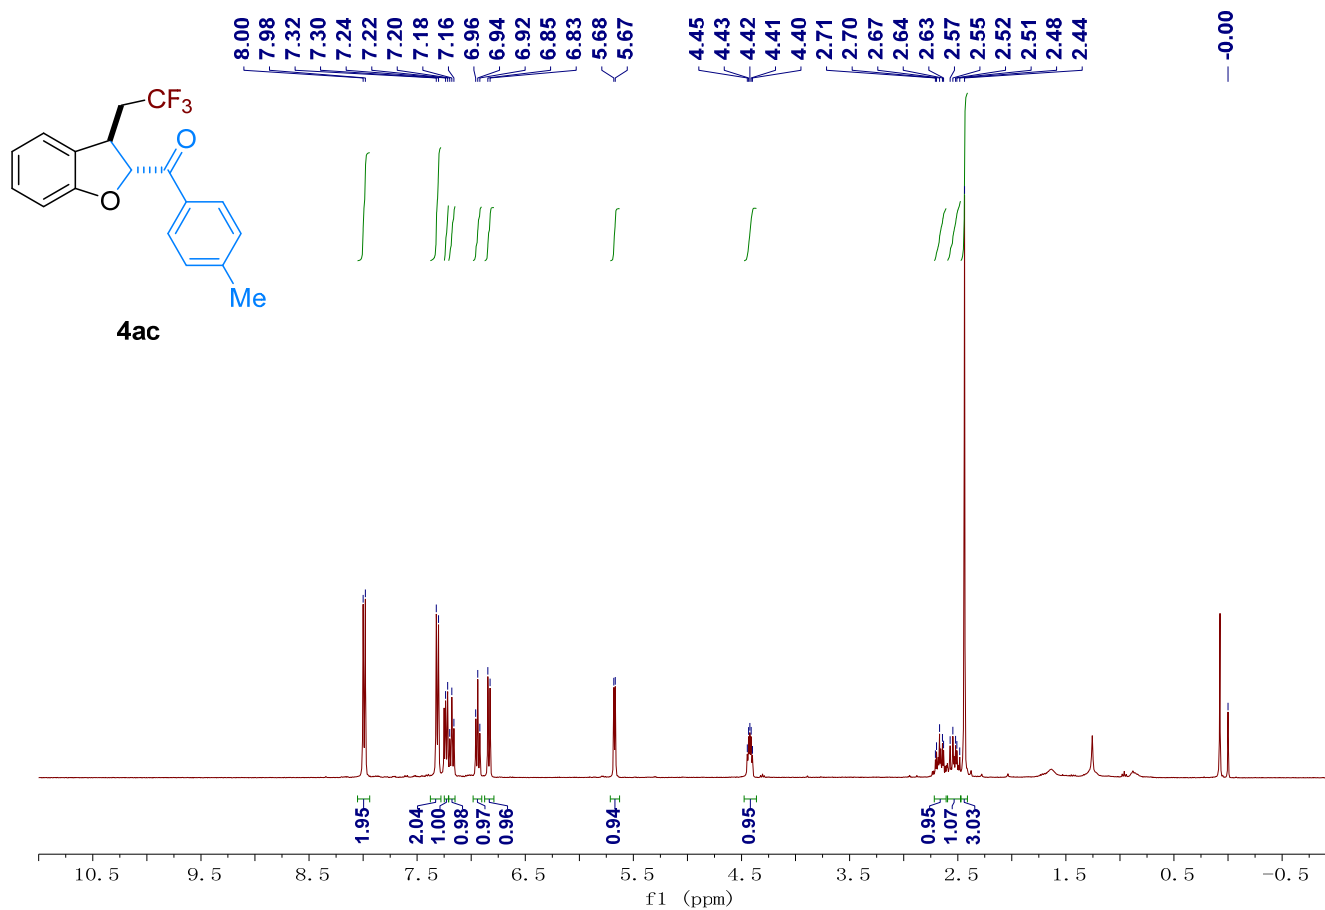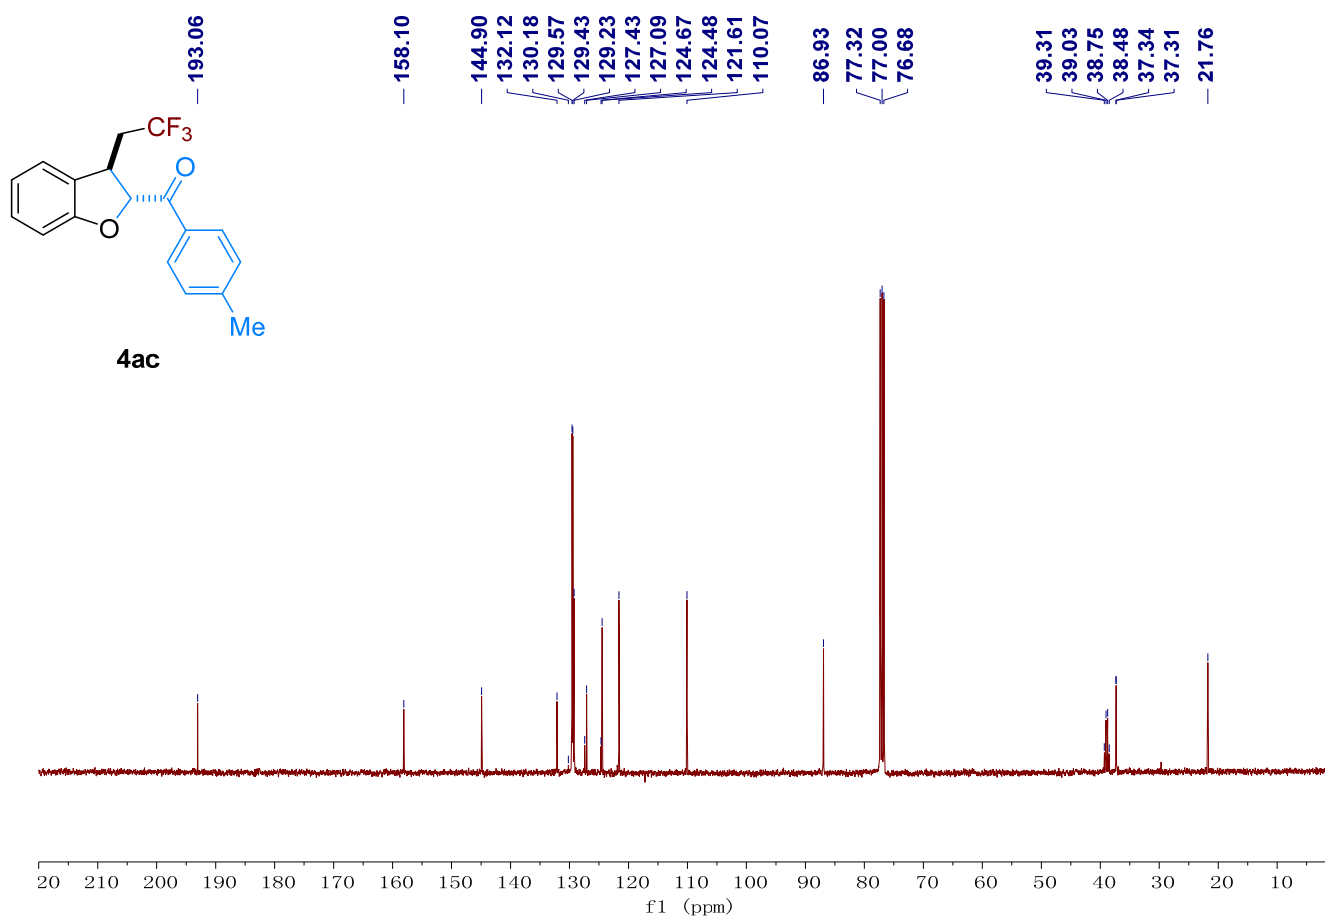

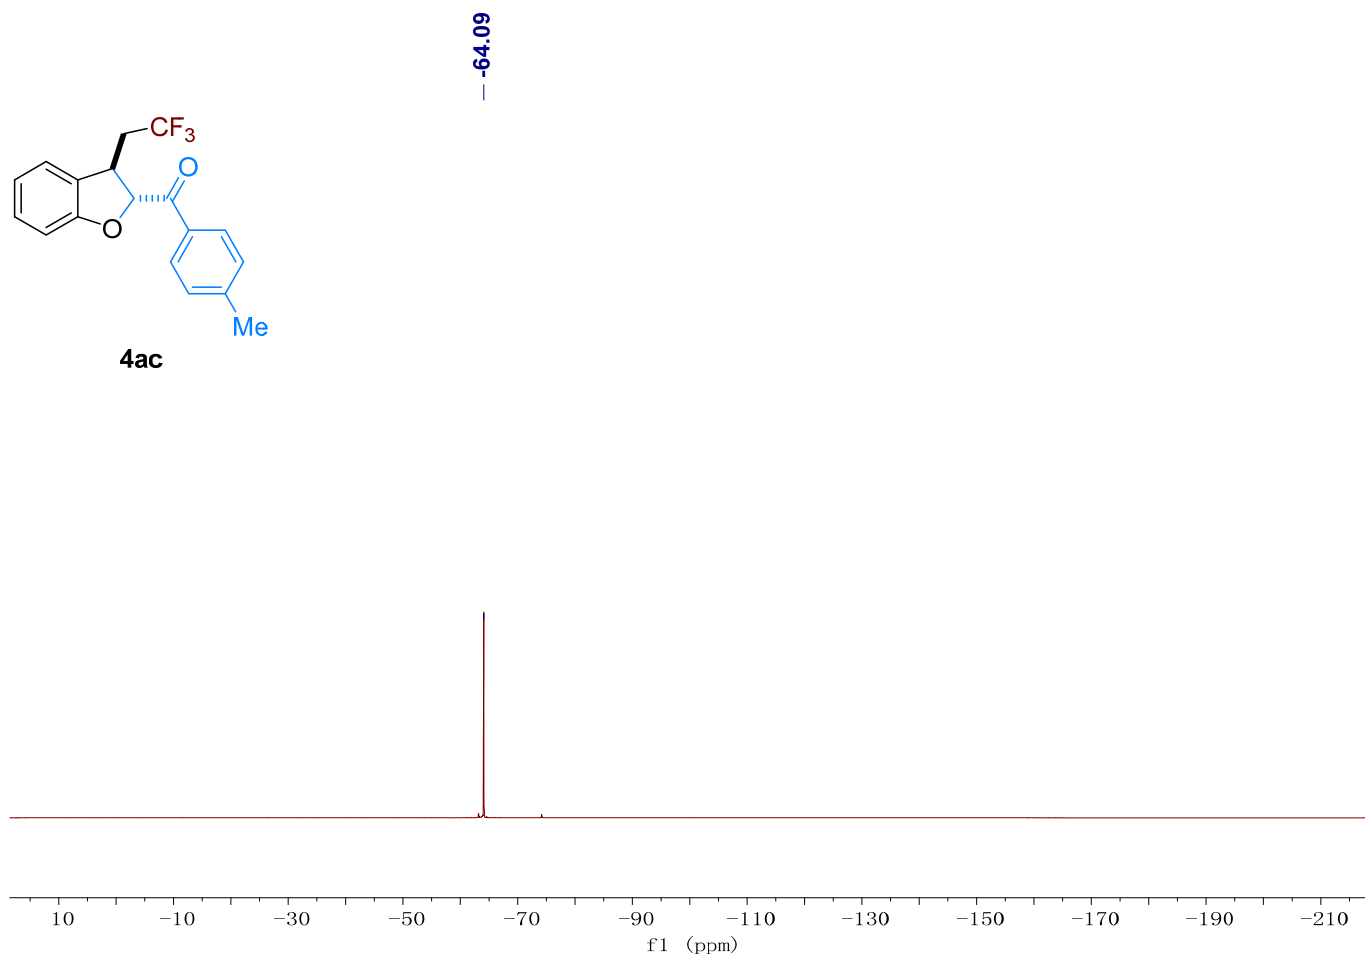

$^1\text{H}$  NMR (400 MHz,  $\text{CDCl}_3$ ),  $^{13}\text{C}$  NMR (100 MHz,  $\text{CDCl}_3$ ) and  $^{19}\text{F}$  NMR (376 MHz,  $\text{CDCl}_3$ ) spectra of product 4ad

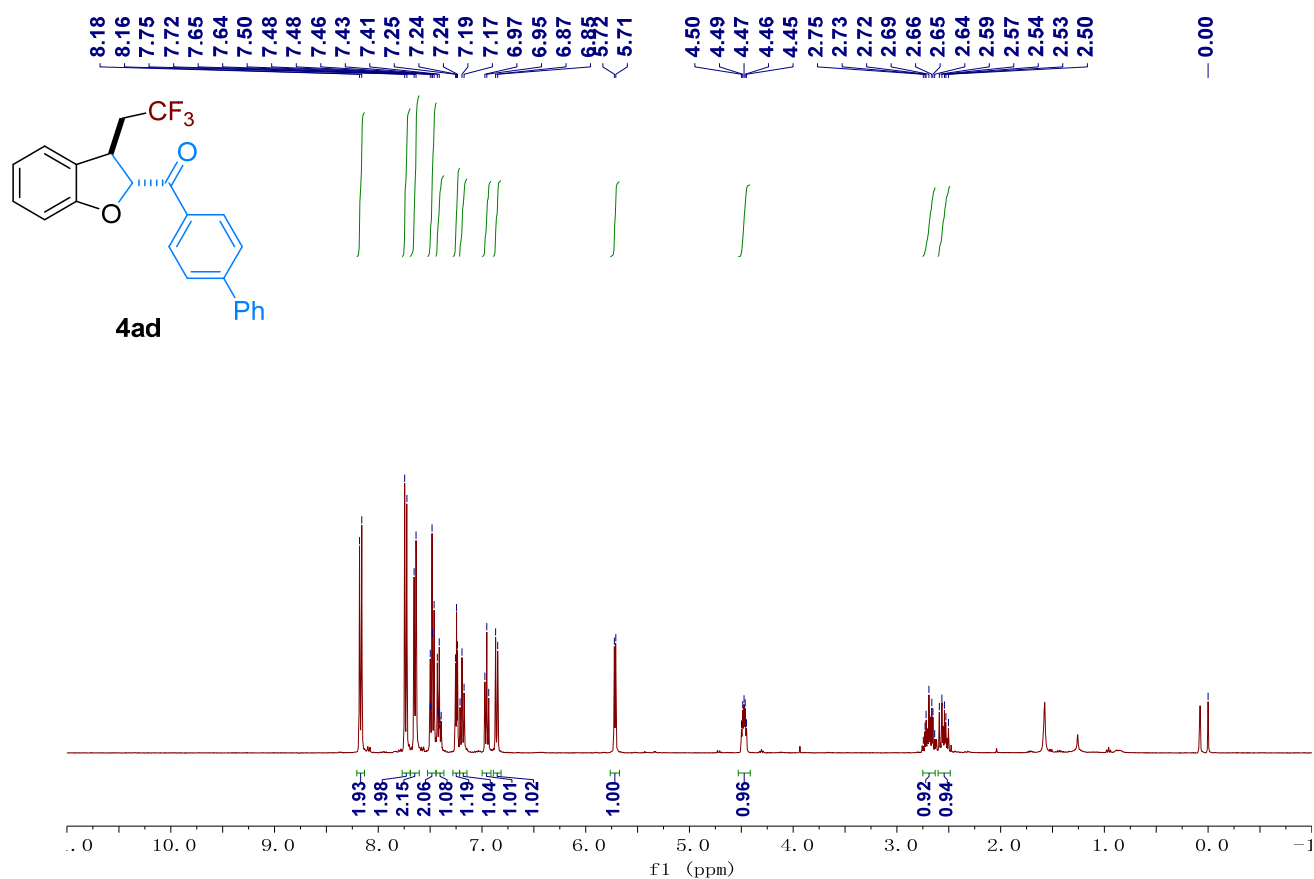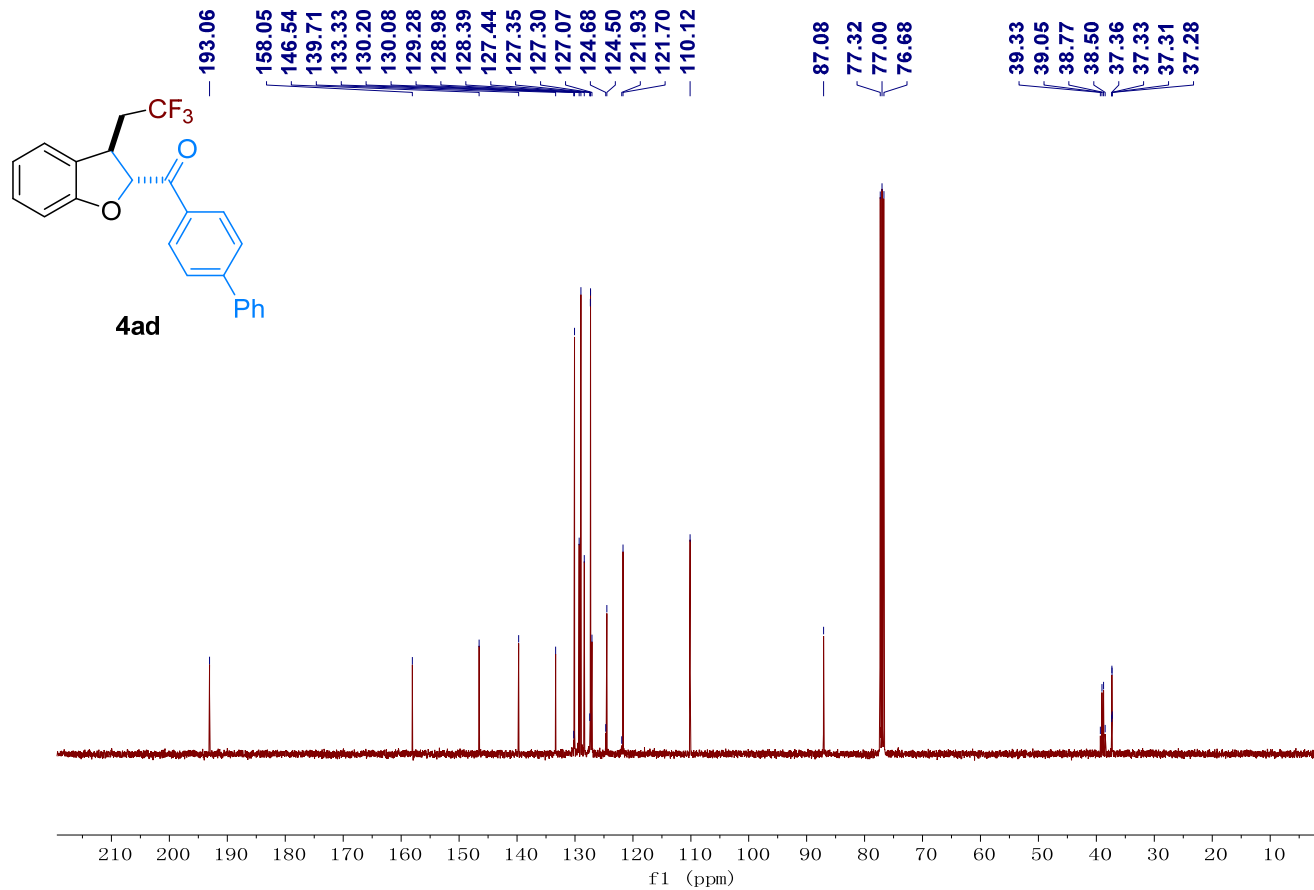

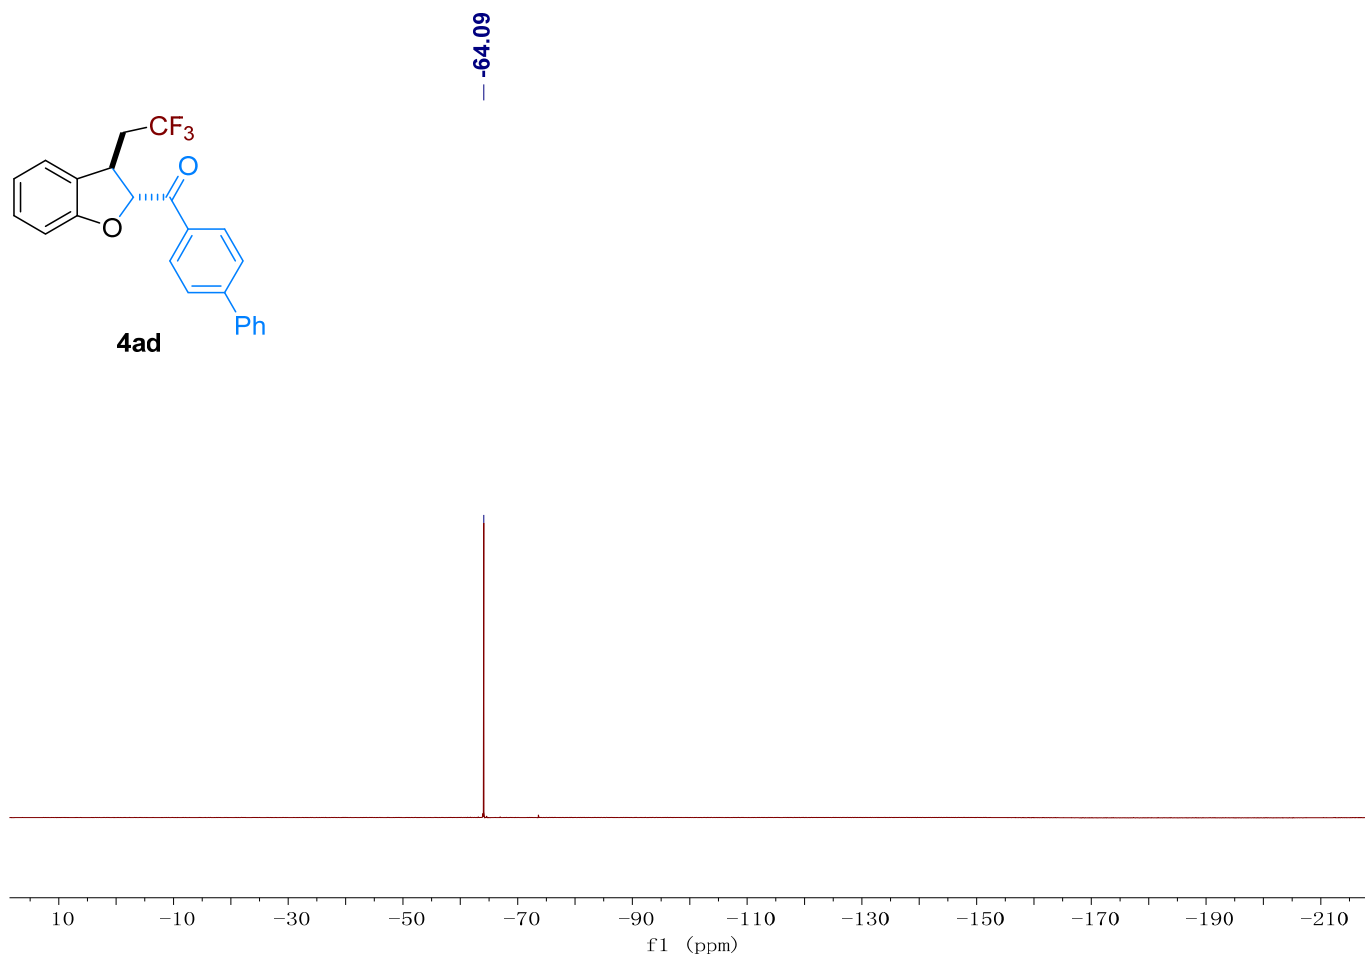

$^1\text{H}$  NMR (400 MHz,  $\text{CDCl}_3$ ),  $^{13}\text{C}$  NMR (100 MHz,  $\text{CDCl}_3$ ) and  $^{19}\text{F}$  NMR (376 MHz,  $\text{CDCl}_3$ ) spectra of product 4ae

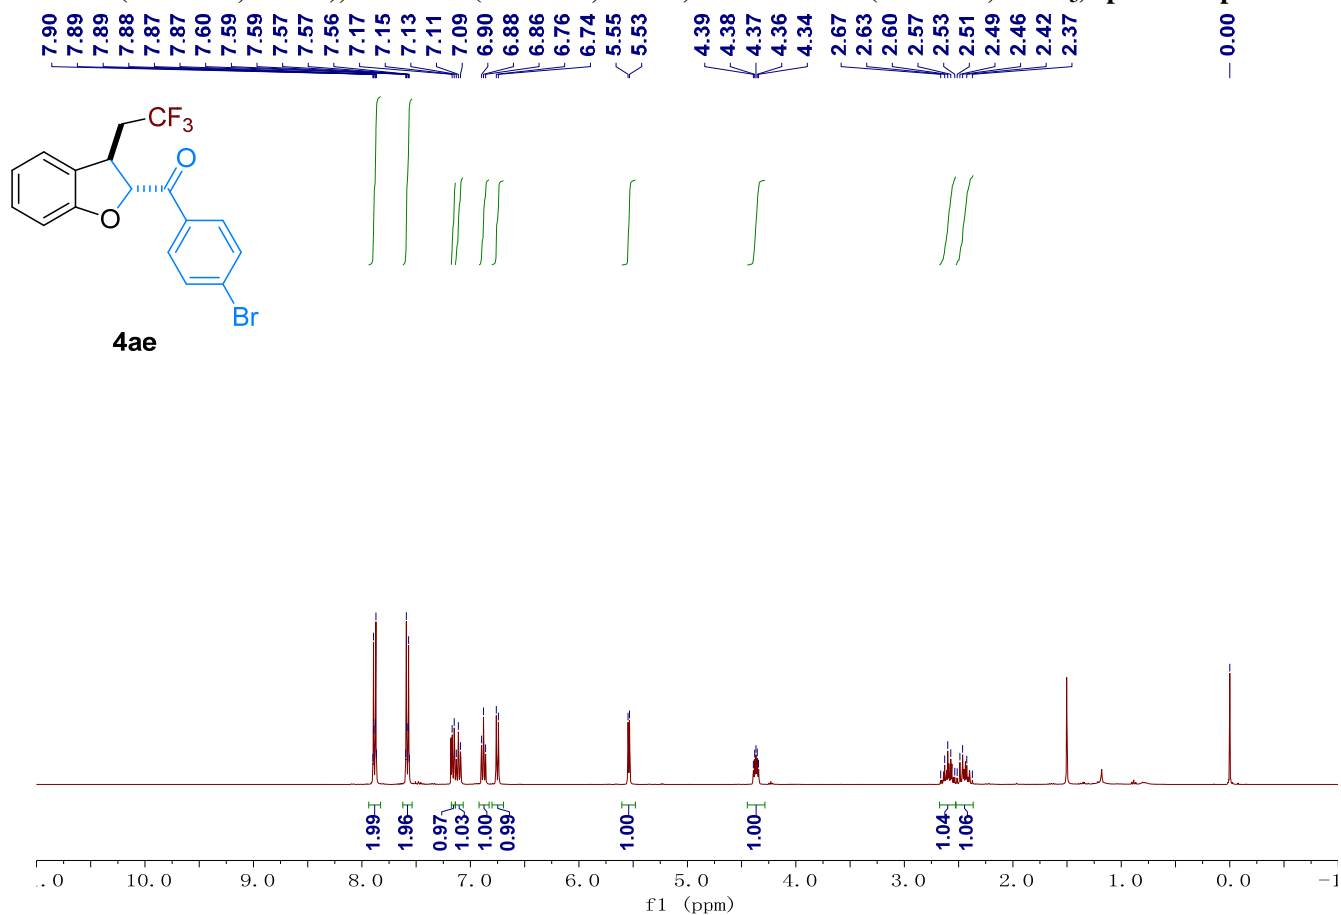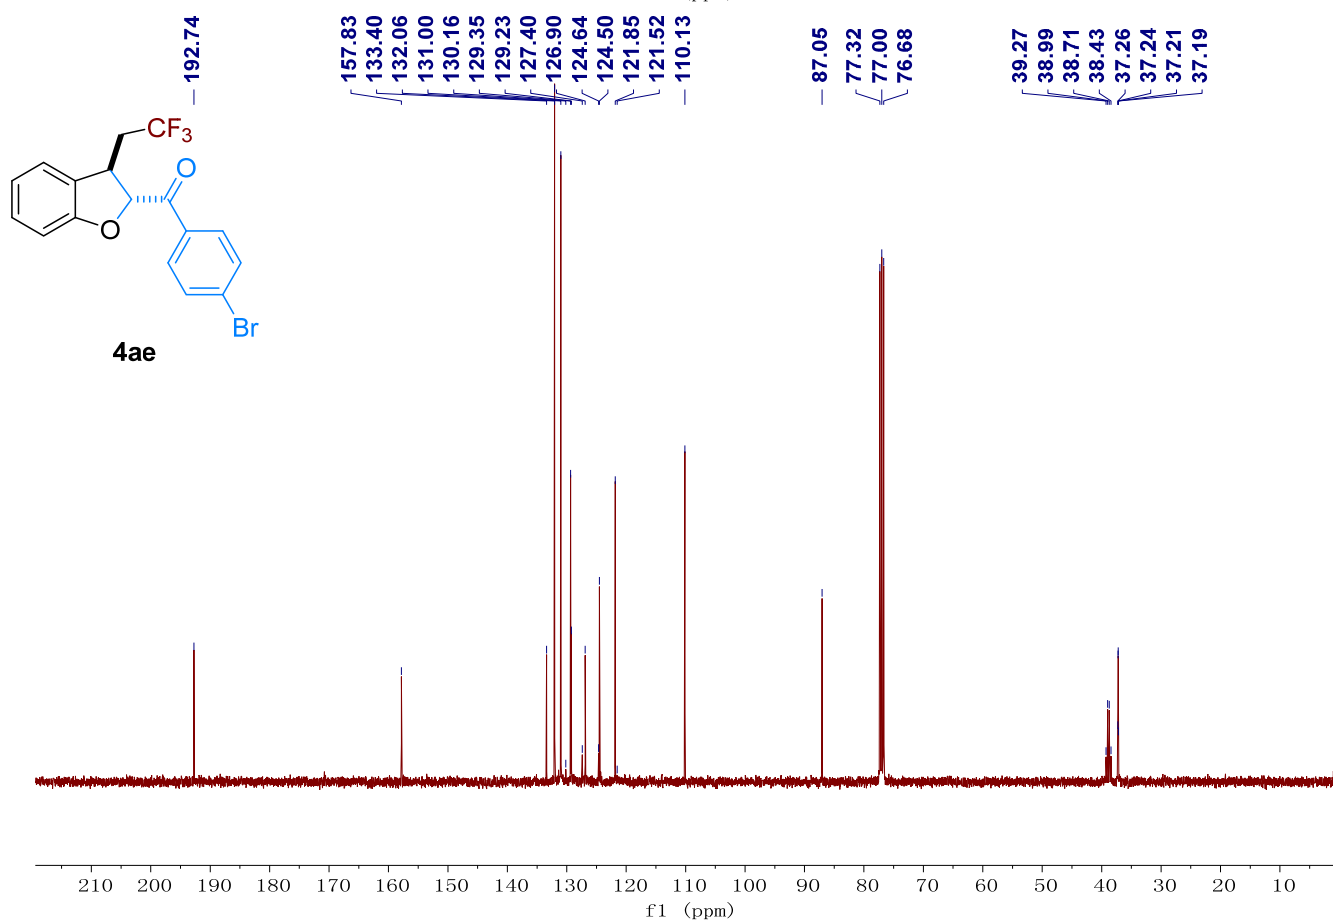

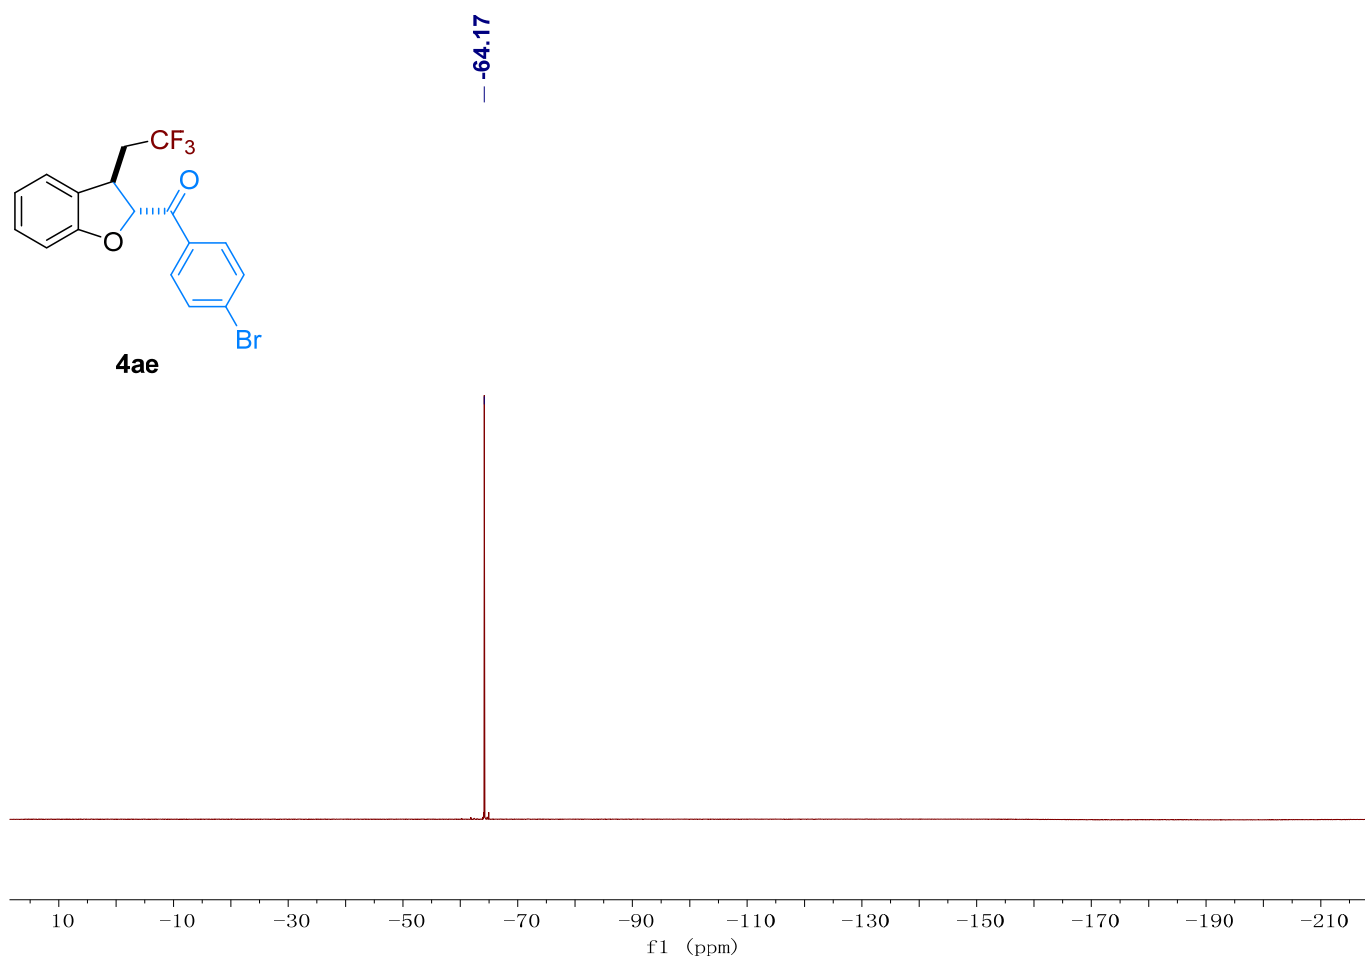



$^1\text{H}$  NMR (400 MHz,  $\text{CDCl}_3$ ),  $^{13}\text{C}$  NMR (100 MHz,  $\text{CDCl}_3$ ) and  $^{19}\text{F}$  NMR (376 MHz,  $\text{CDCl}_3$ ) spectra of product 4af

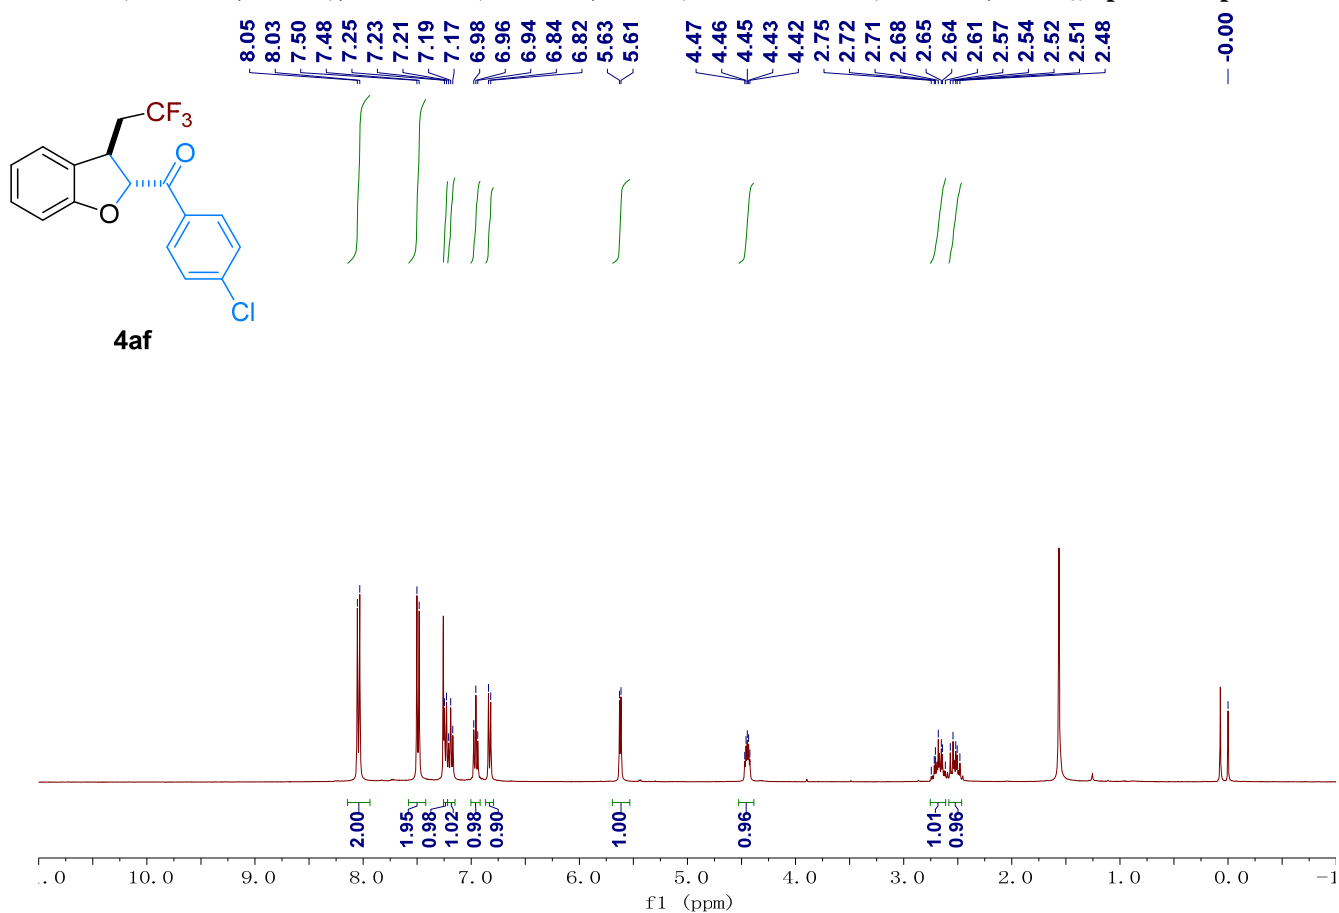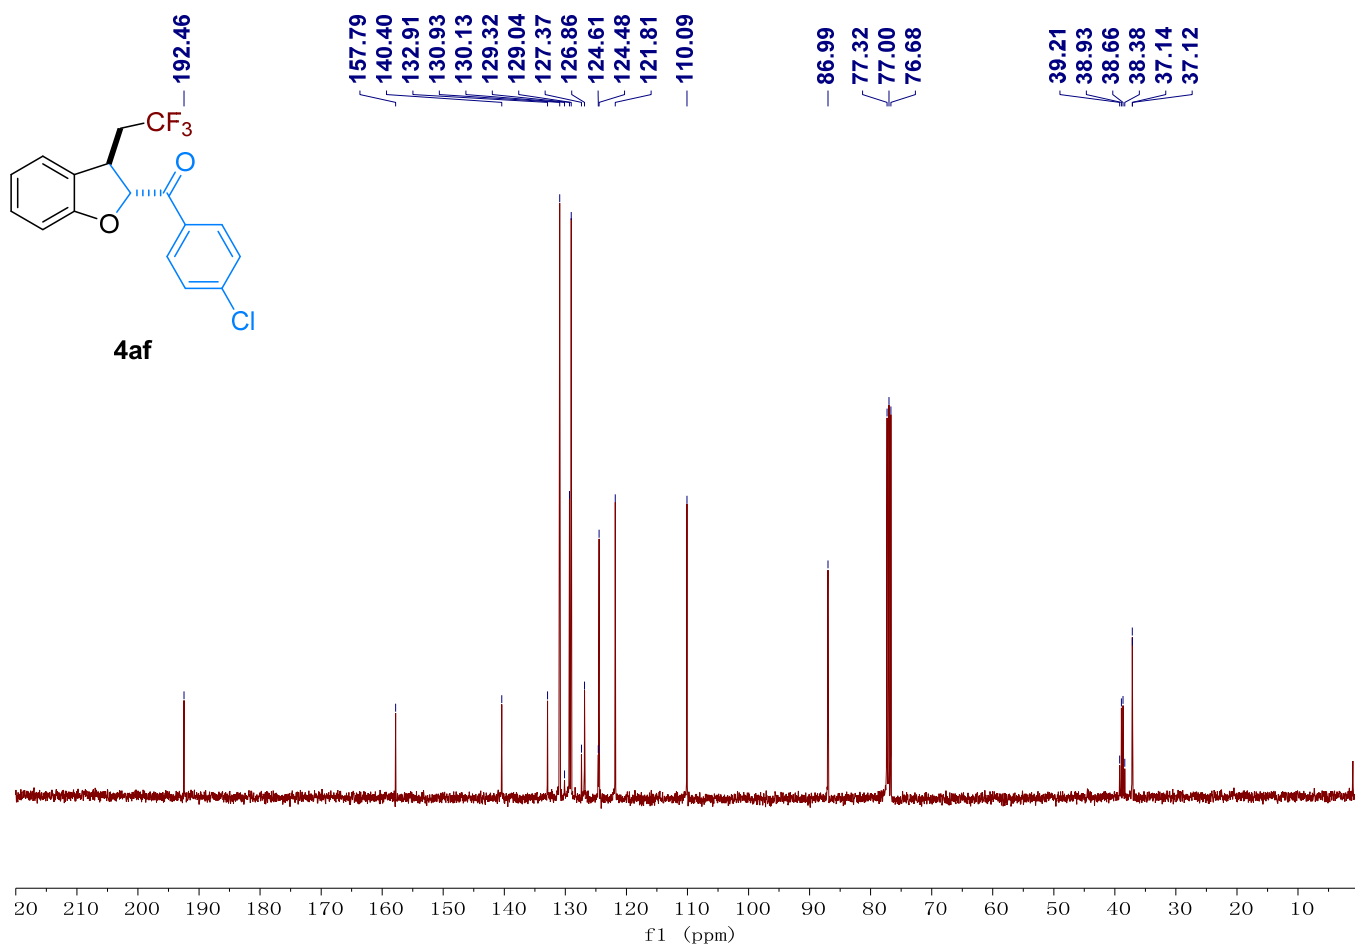

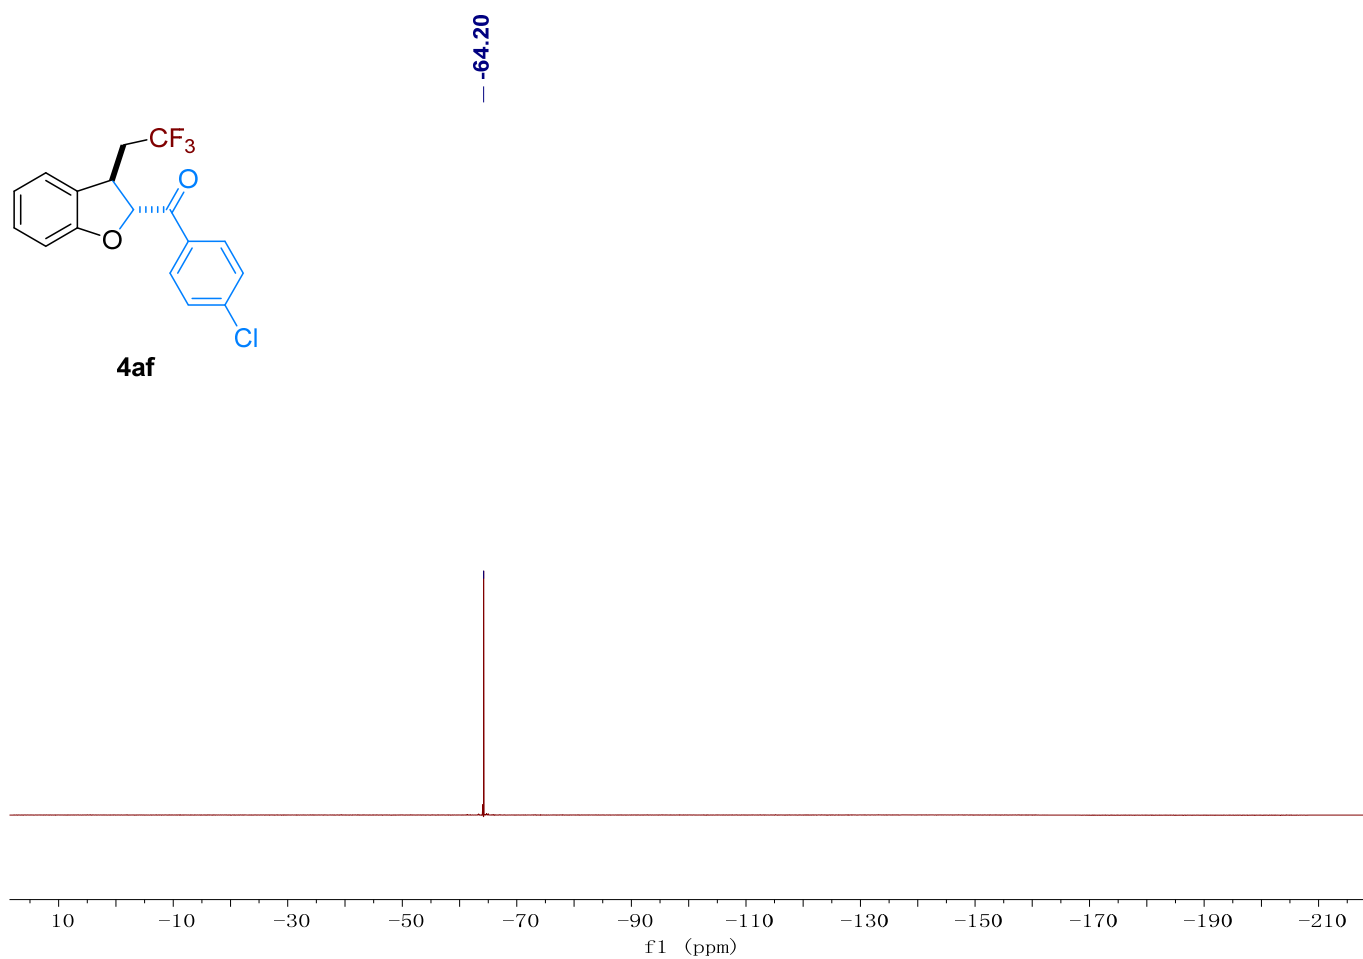

$^1\text{H}$  NMR (400 MHz,  $\text{CDCl}_3$ ),  $^{13}\text{C}$  NMR (100 MHz,  $\text{CDCl}_3$ ) and  $^{19}\text{F}$  NMR (376 MHz,  $\text{CDCl}_3$ ) spectra of product 4ag

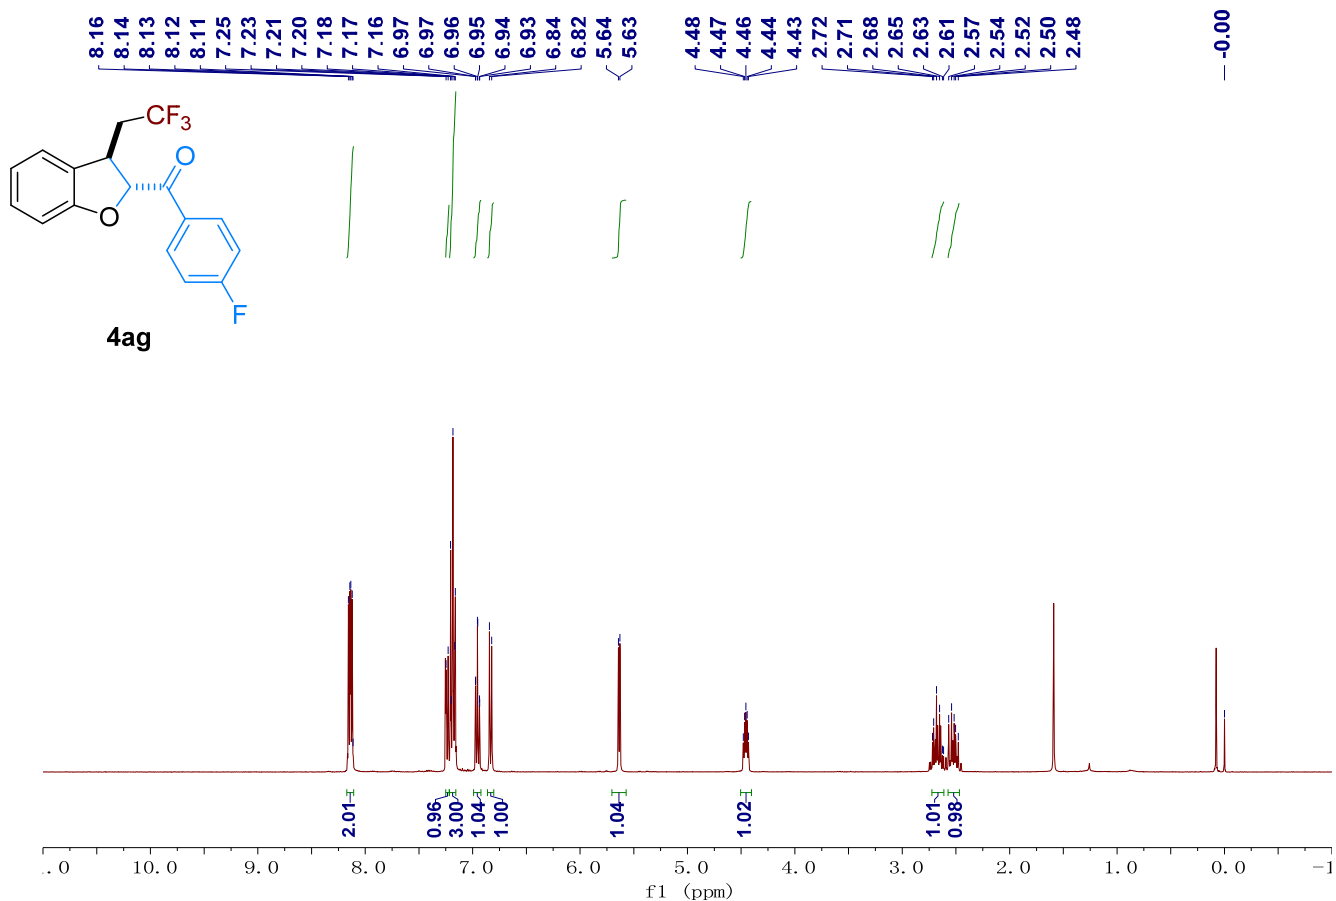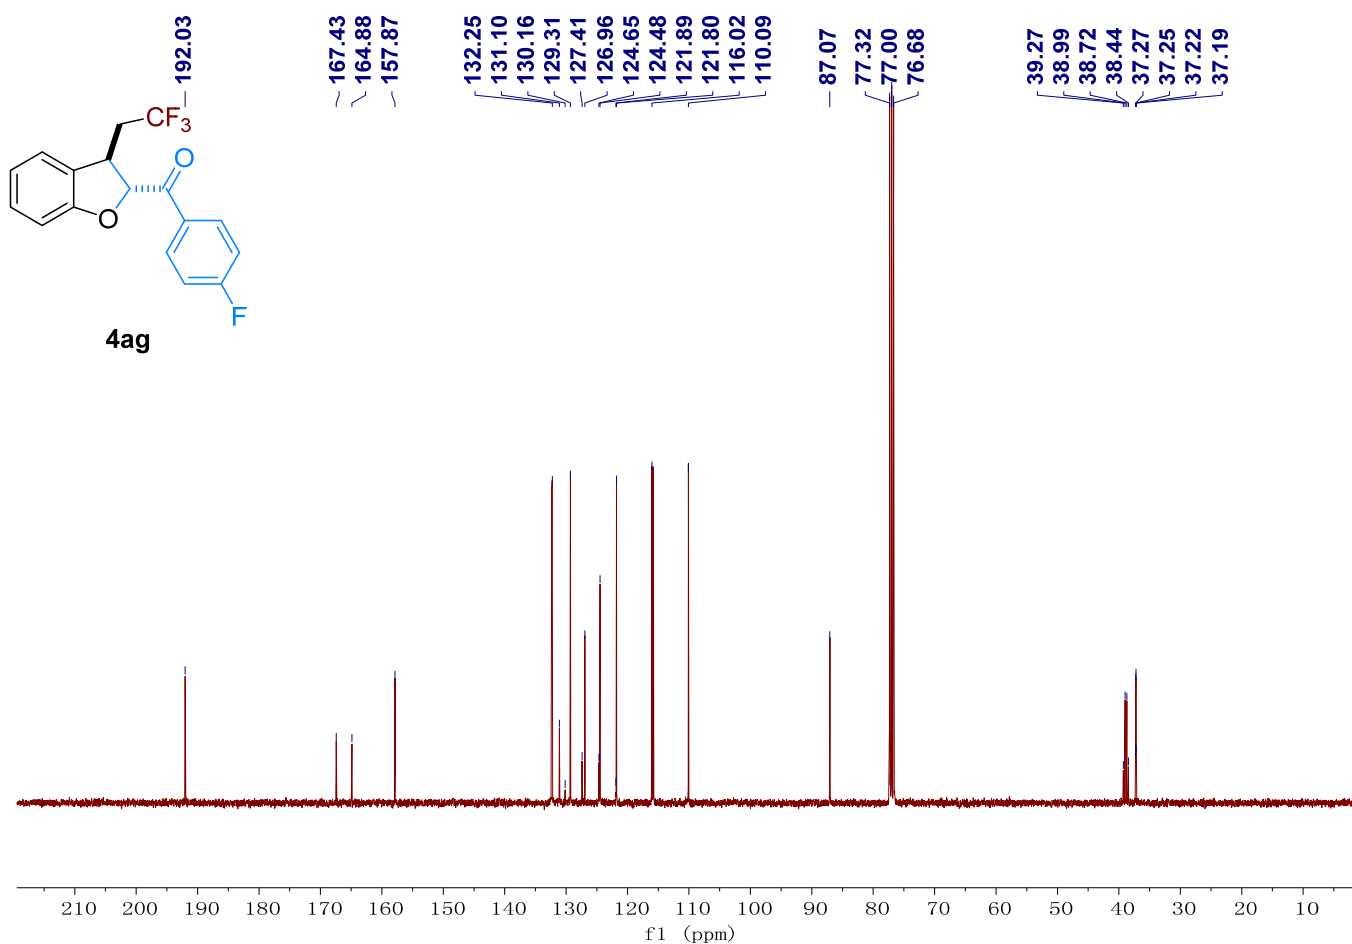

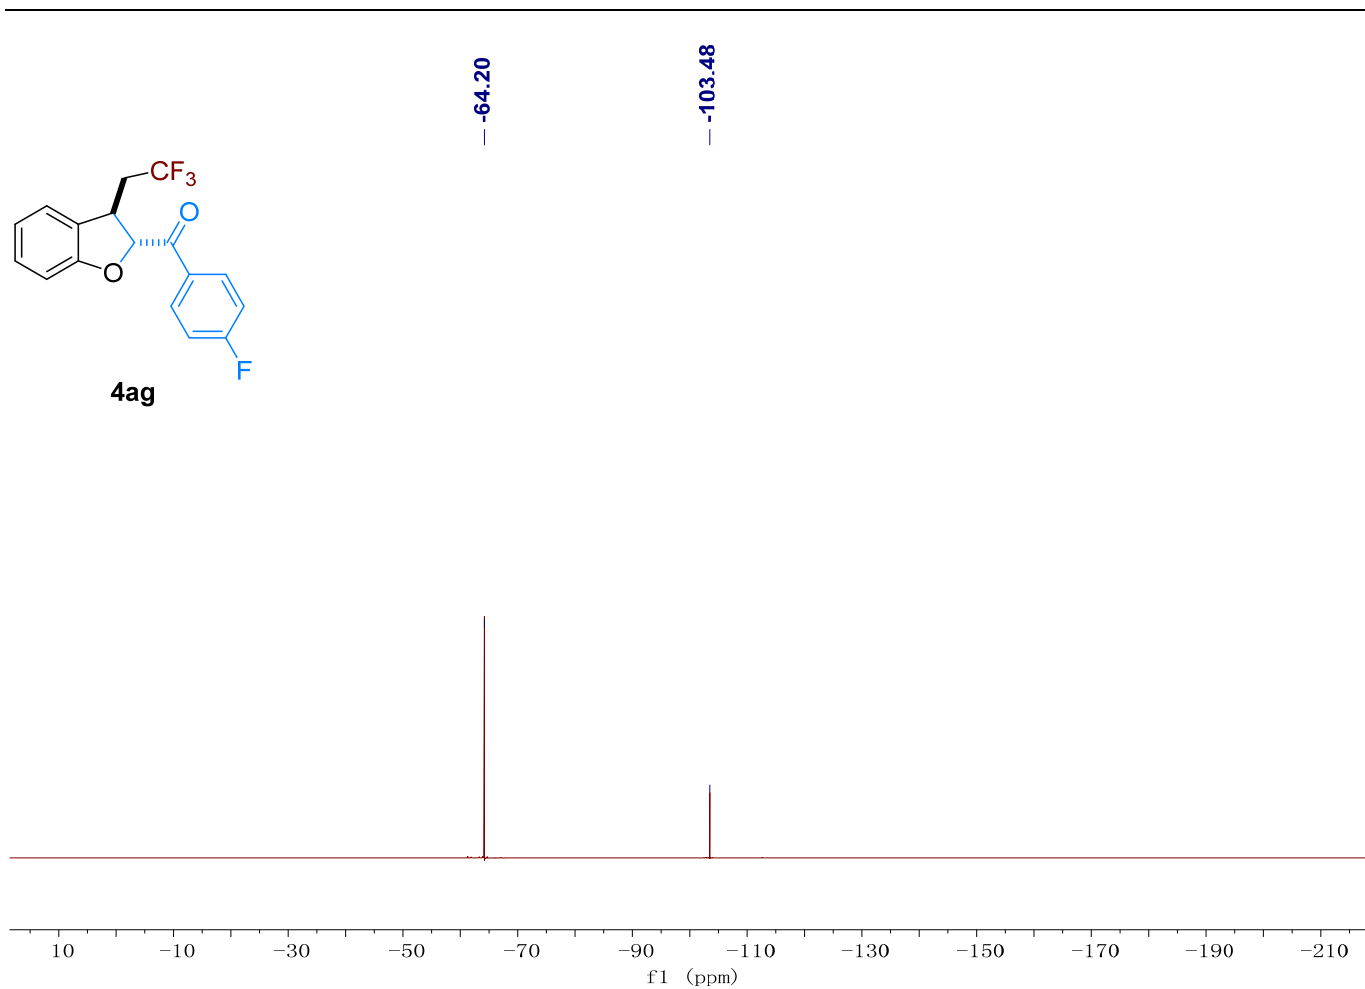

$^1\text{H}$  NMR (400 MHz,  $\text{CDCl}_3$ ),  $^{13}\text{C}$  NMR (100 MHz,  $\text{CDCl}_3$ ) and  $^{19}\text{F}$  NMR (376 MHz,  $\text{CDCl}_3$ ) spectra of product 4ah

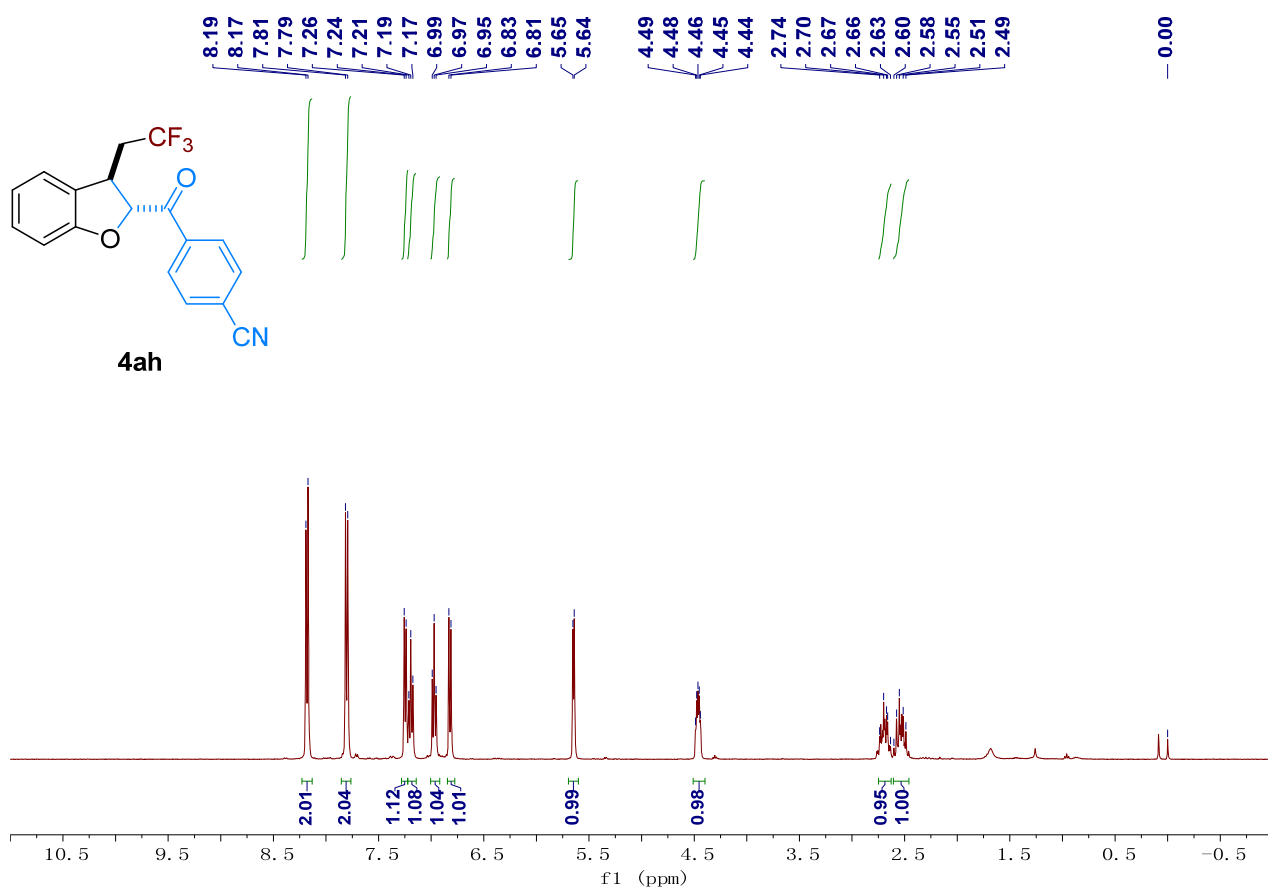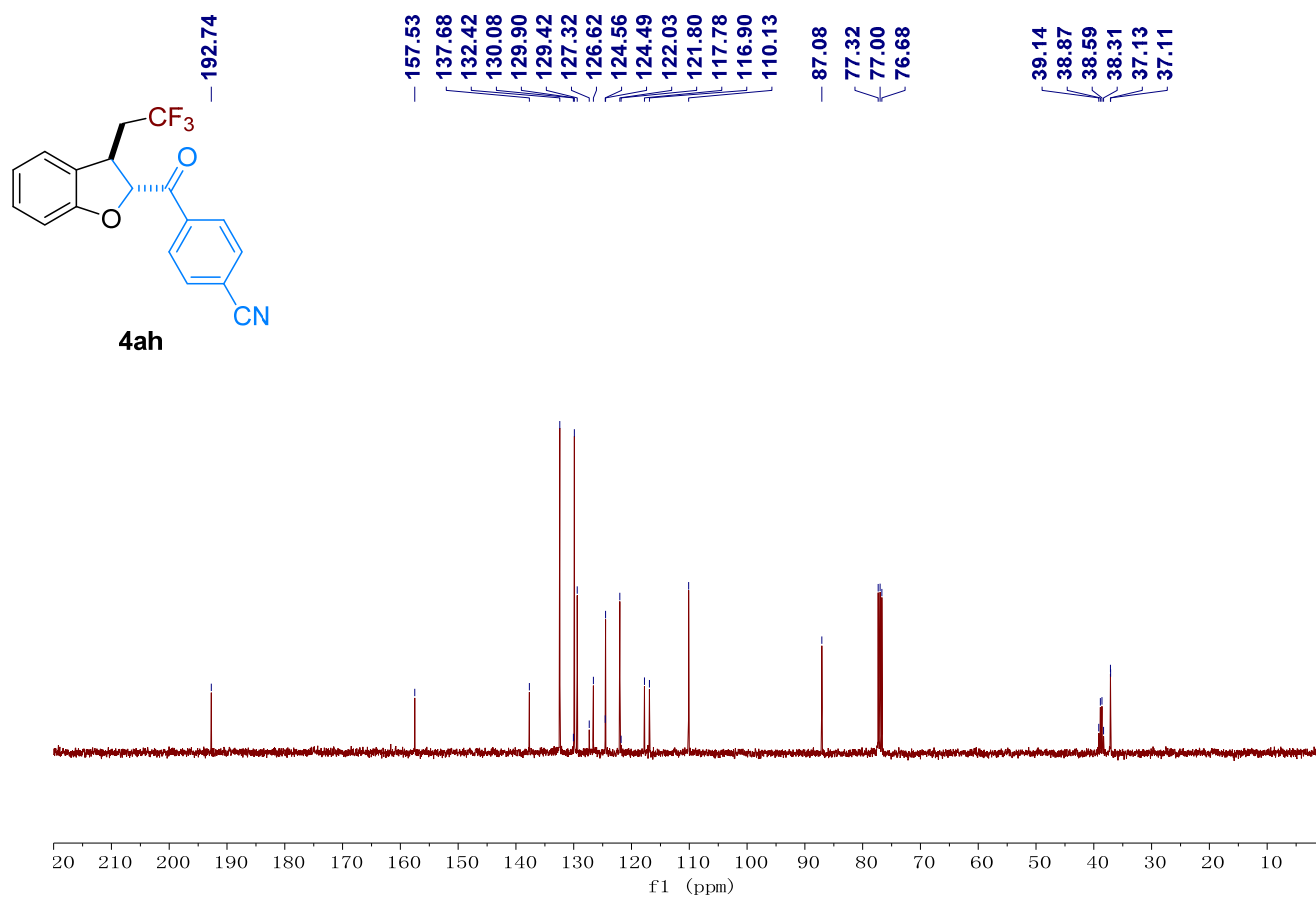

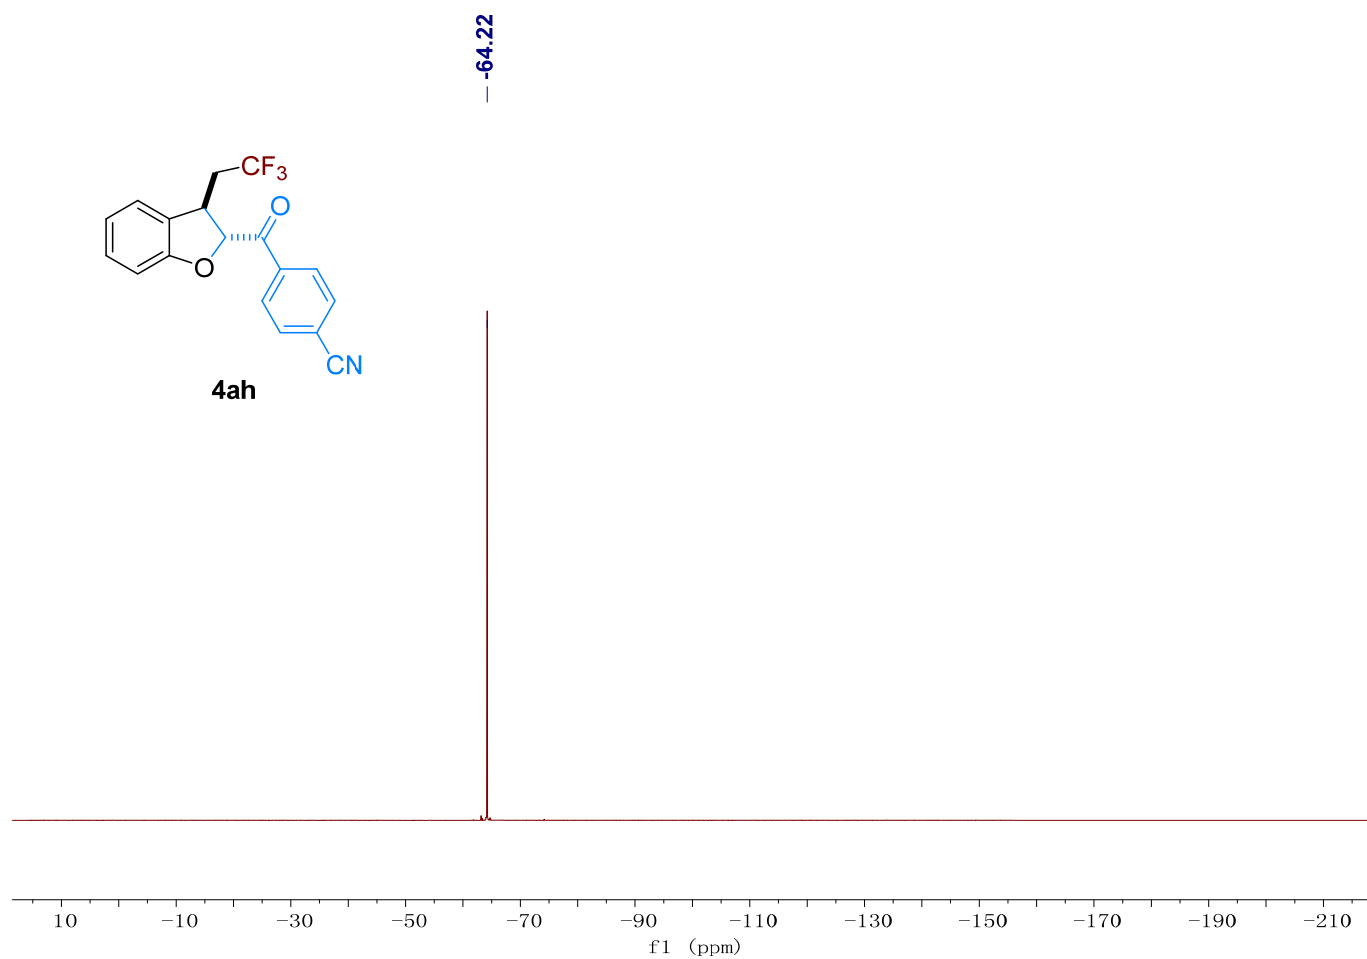

$^1\text{H}$  NMR (400 MHz,  $\text{CDCl}_3$ ),  $^{13}\text{C}$  NMR (100 MHz,  $\text{CDCl}_3$ ) and  $^{19}\text{F}$  NMR (376 MHz,  $\text{CDCl}_3$ ) spectra of product 4ai

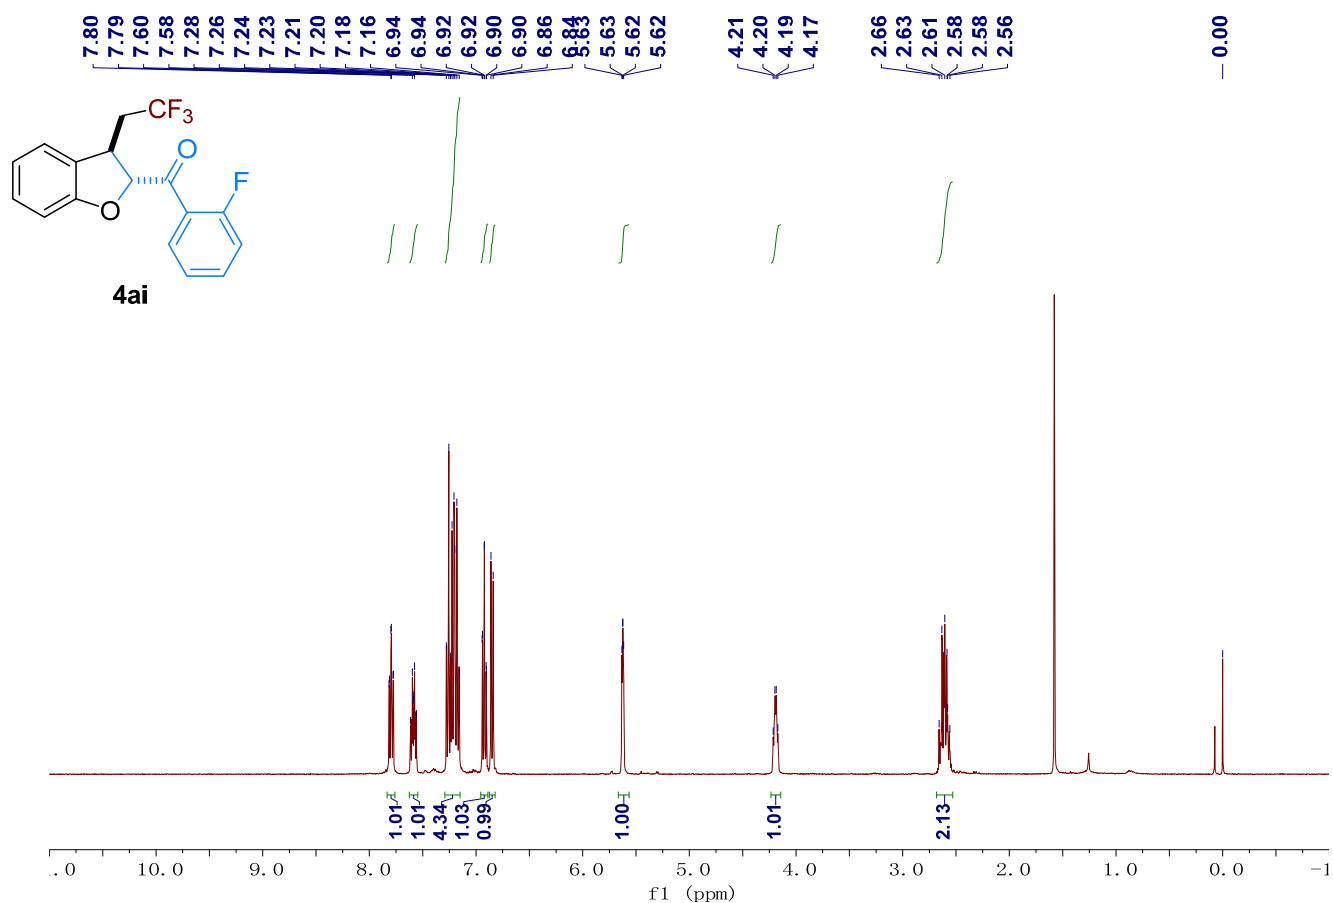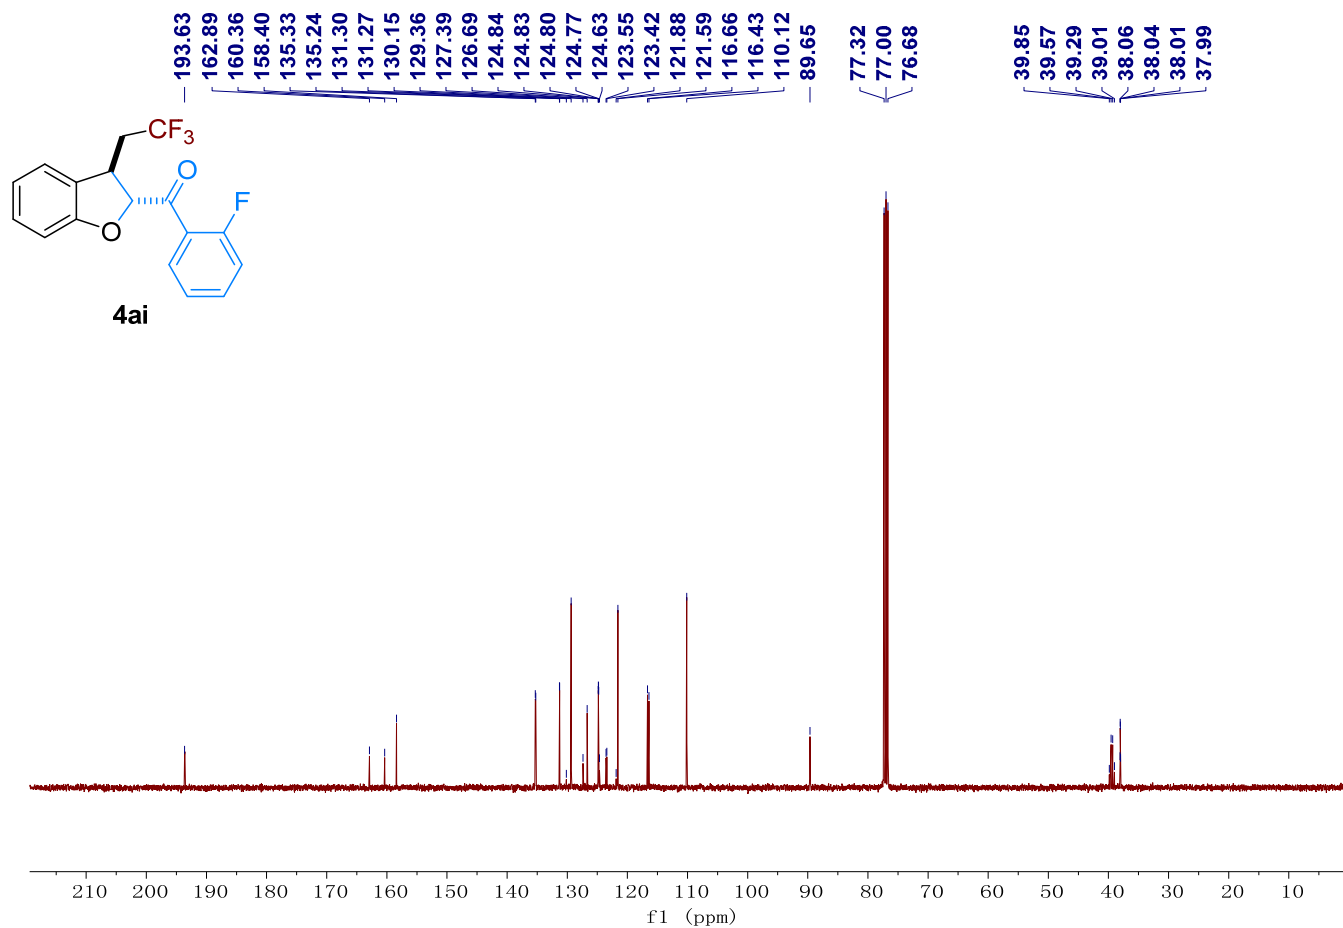

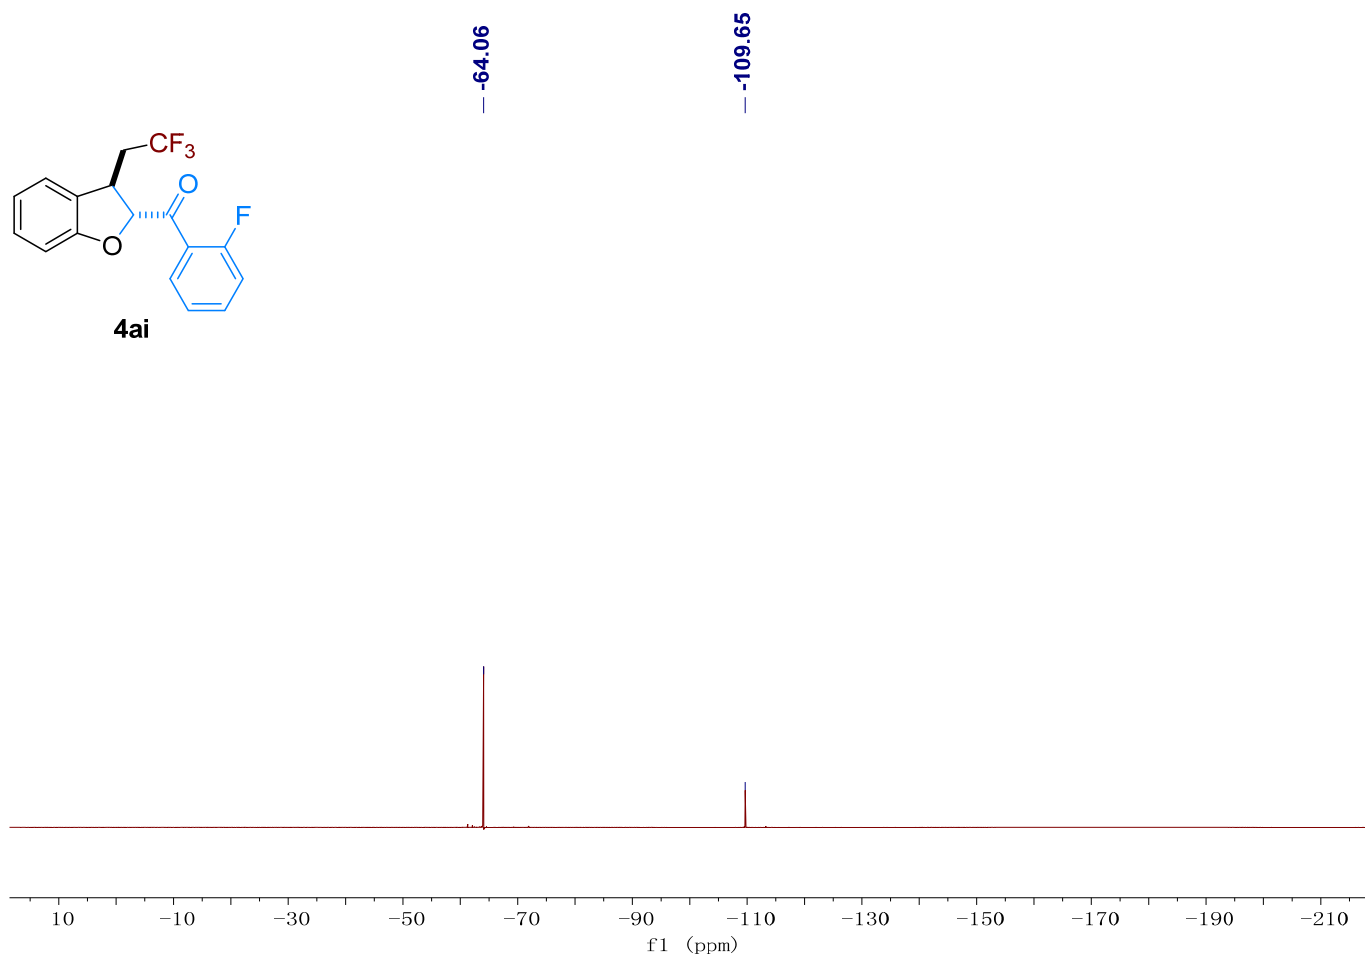



$^1\text{H}$  NMR (400 MHz,  $\text{CDCl}_3$ ),  $^{13}\text{C}$  NMR (100 MHz,  $\text{CDCl}_3$ ) and  $^{19}\text{F}$  NMR (376 MHz,  $\text{CDCl}_3$ ) spectra of product 4aj

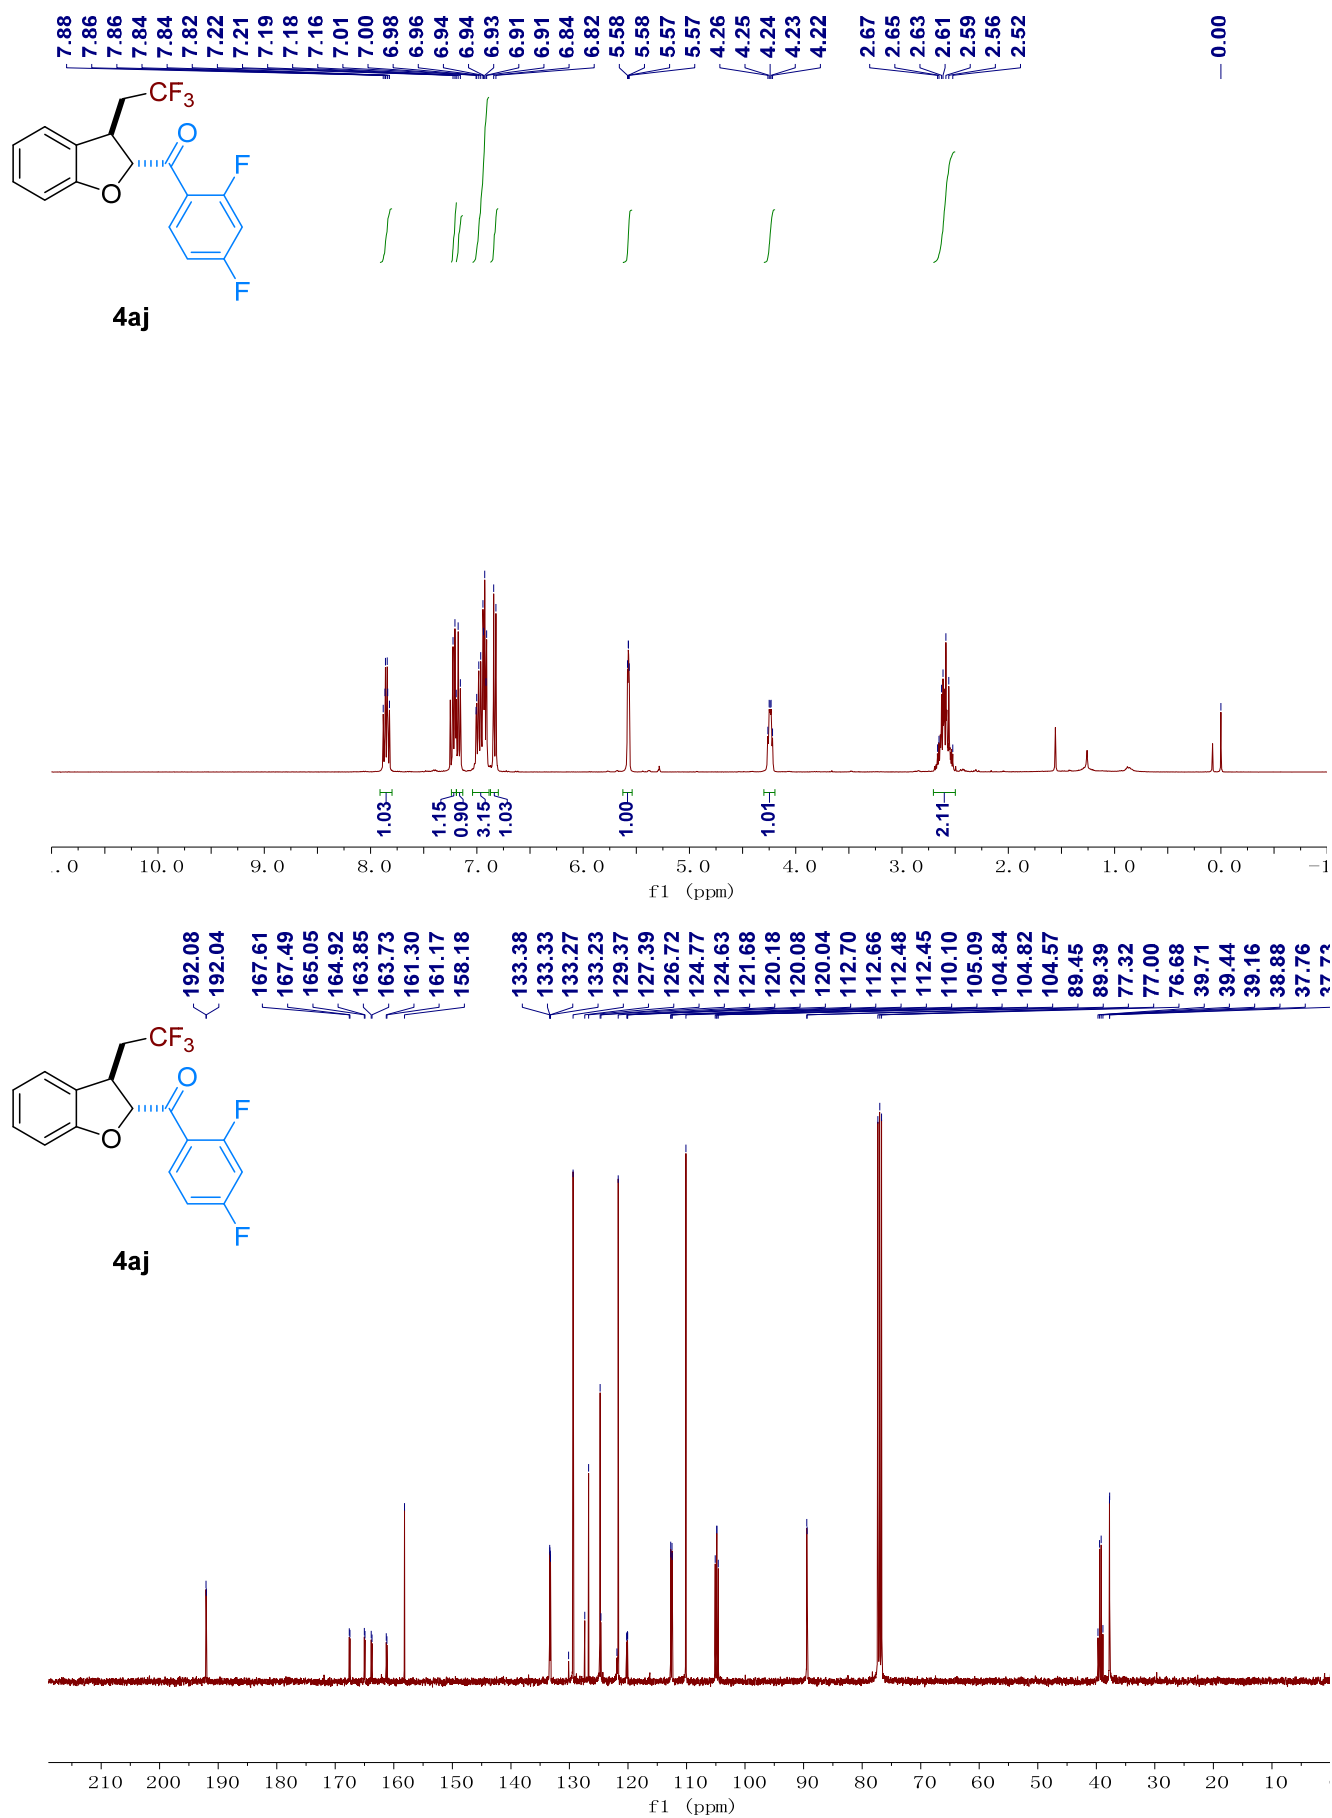

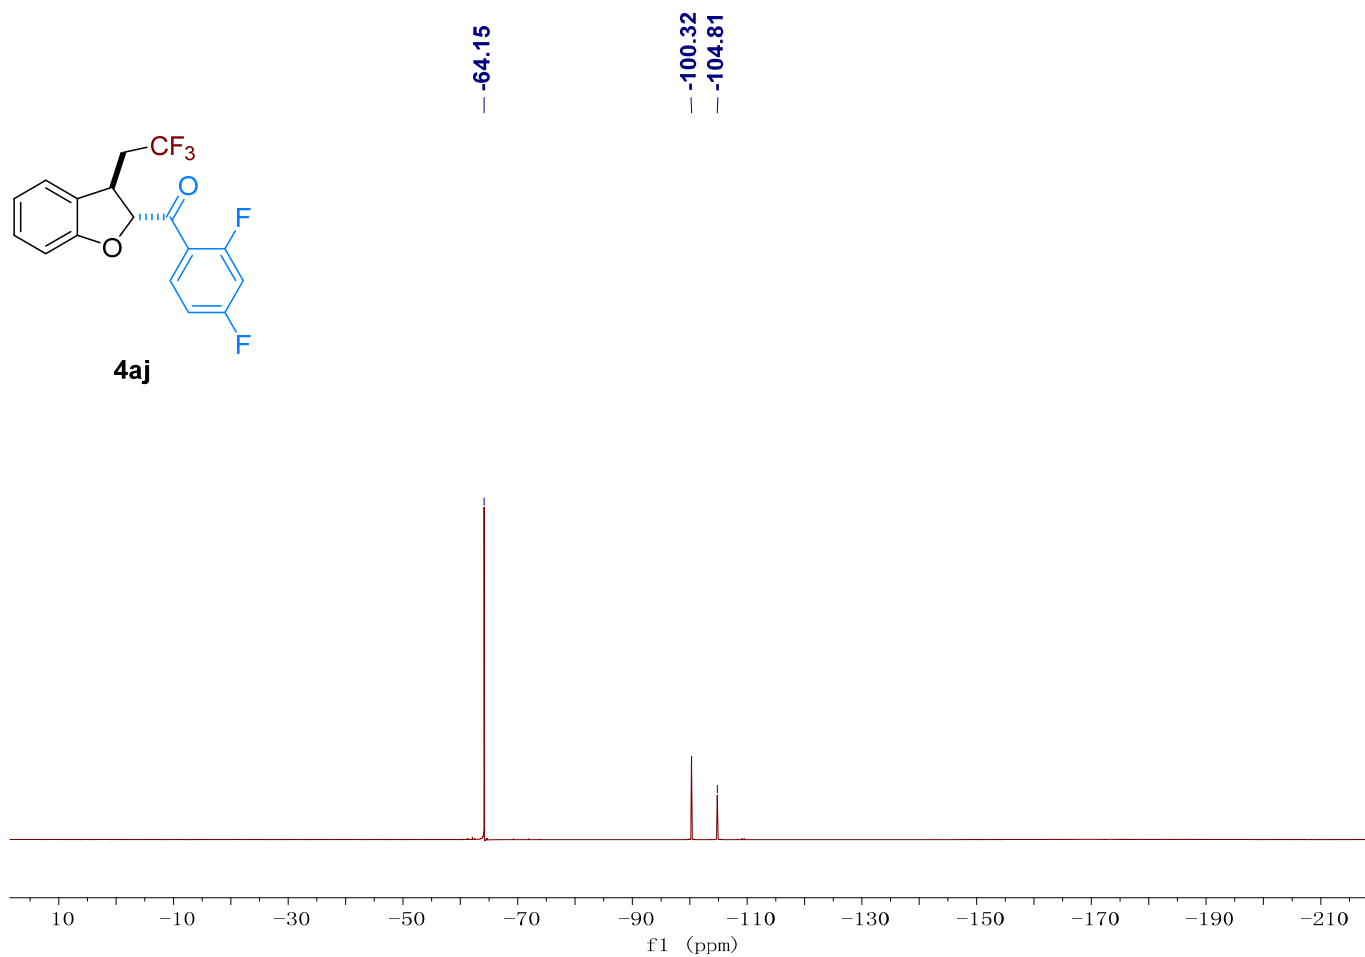

$^1\text{H}$  NMR (400 MHz,  $\text{CDCl}_3$ ),  $^{13}\text{C}$  NMR (100 MHz,  $\text{CDCl}_3$ ) and  $^{19}\text{F}$  NMR (376 MHz,  $\text{CDCl}_3$ ) spectra of product 4ak

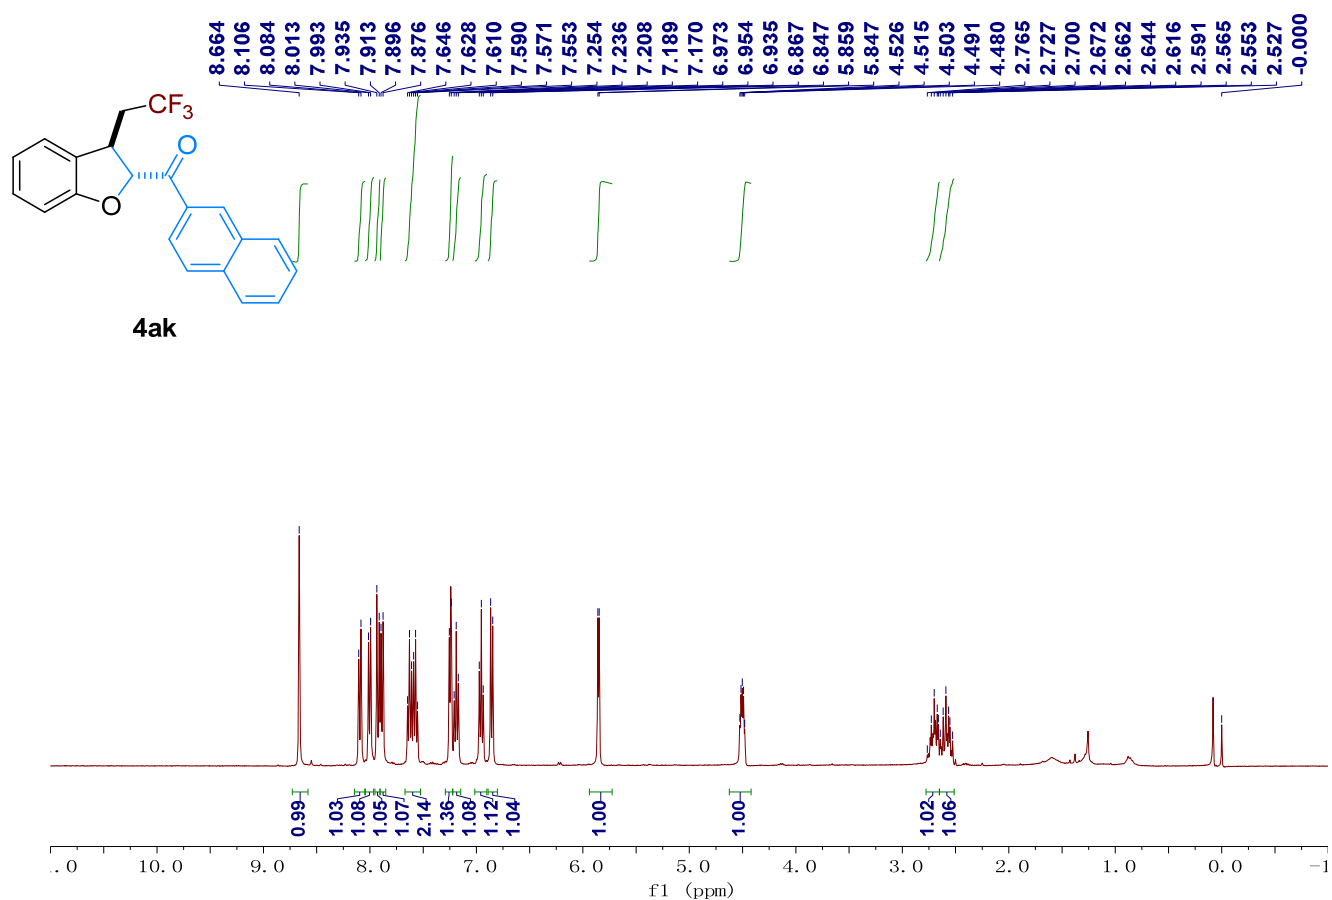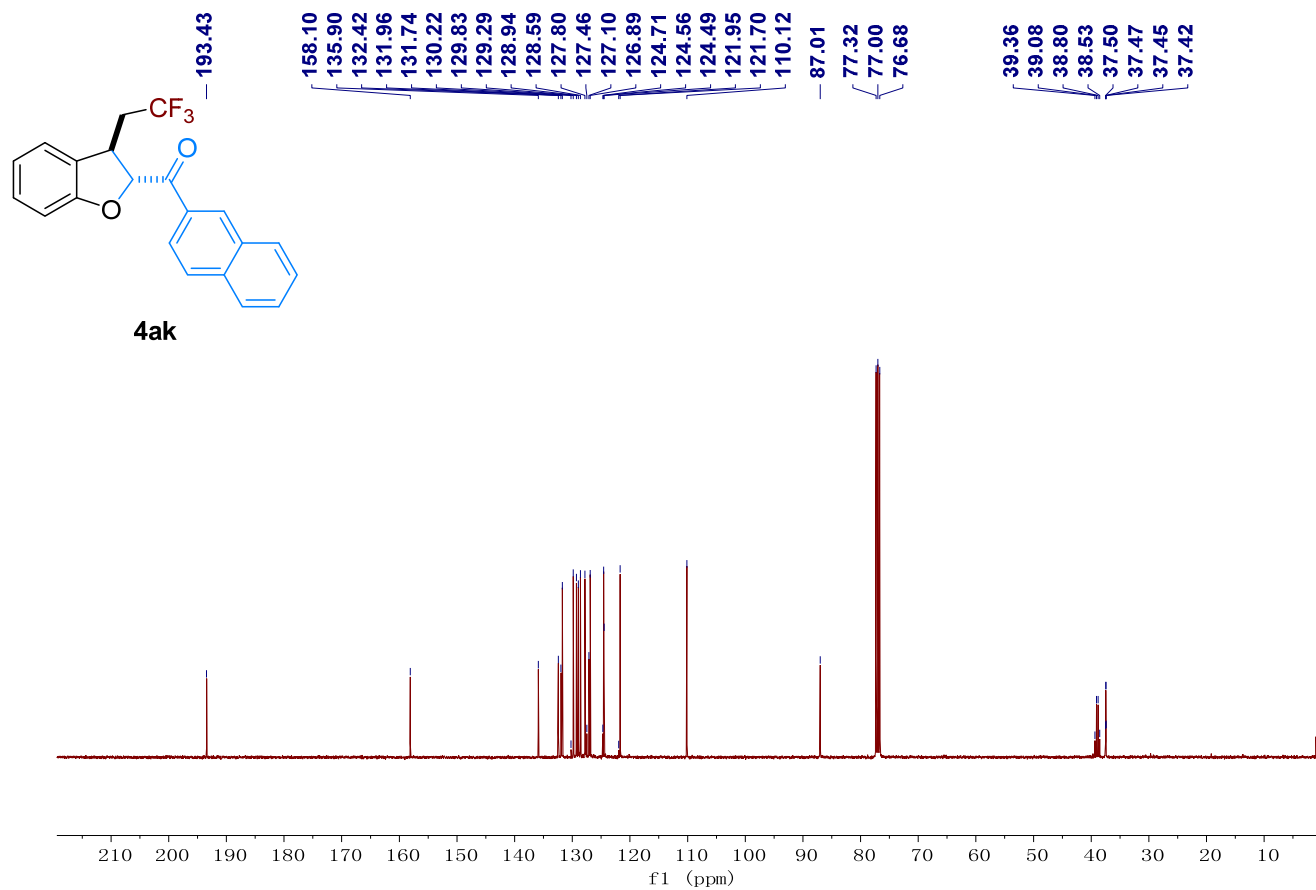

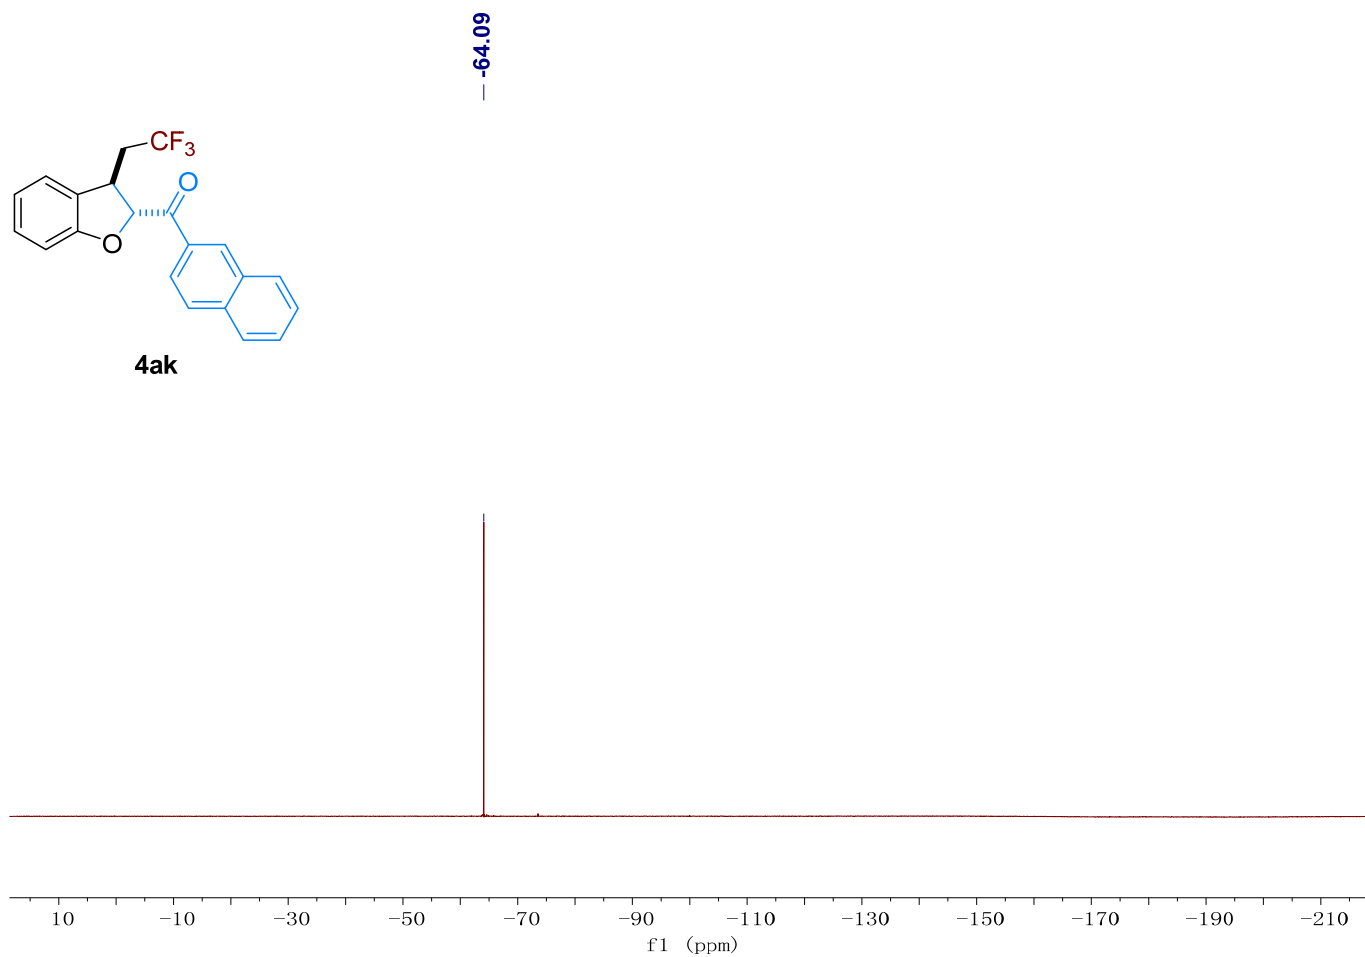

$^1\text{H}$  NMR (400 MHz,  $\text{CDCl}_3$ ),  $^{13}\text{C}$  NMR (100 MHz,  $\text{CDCl}_3$ ) and  $^{19}\text{F}$  NMR (376 MHz,  $\text{CDCl}_3$ ) spectra of product 4al

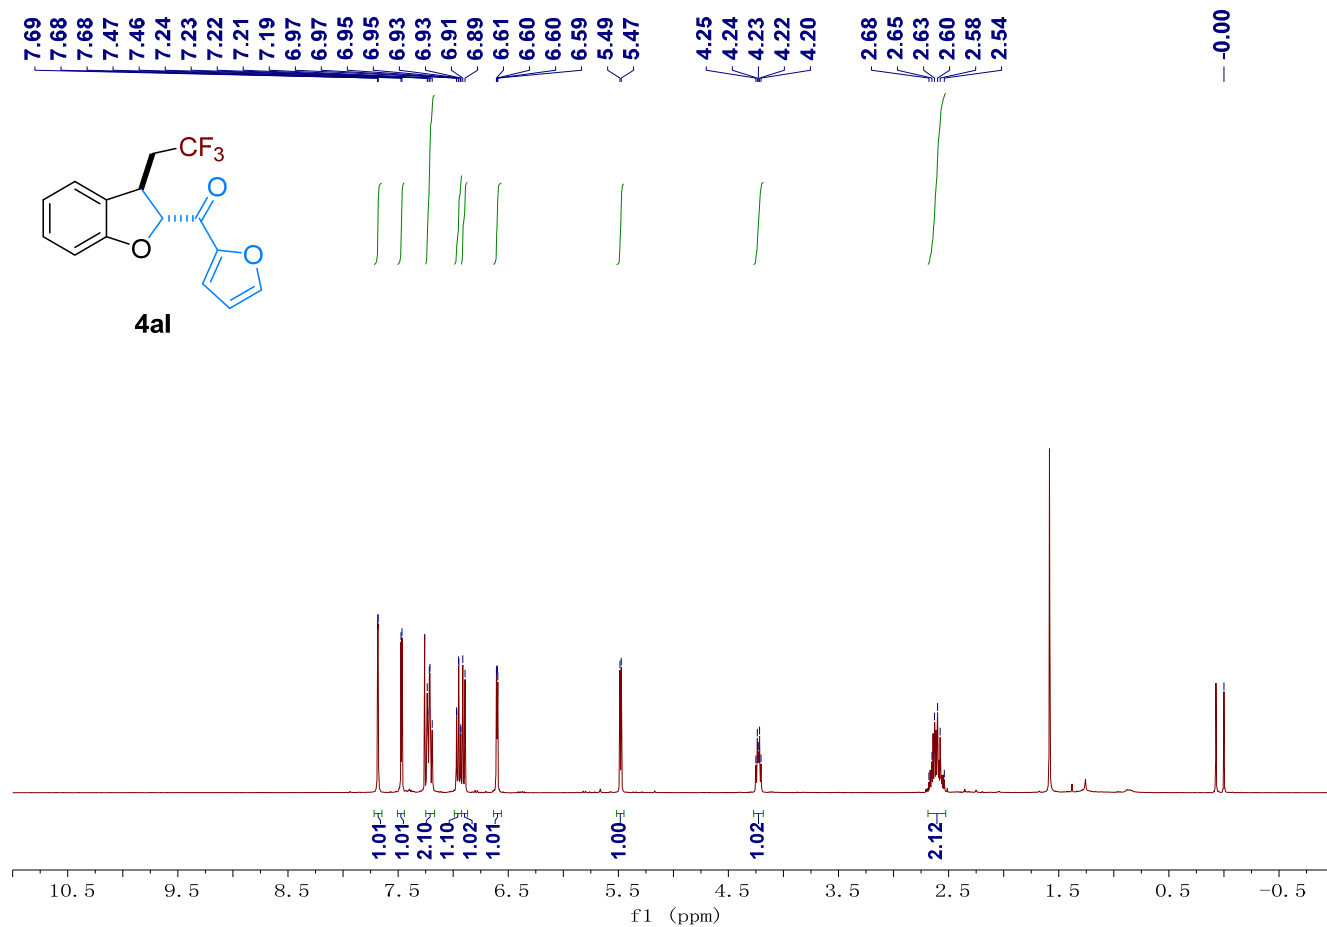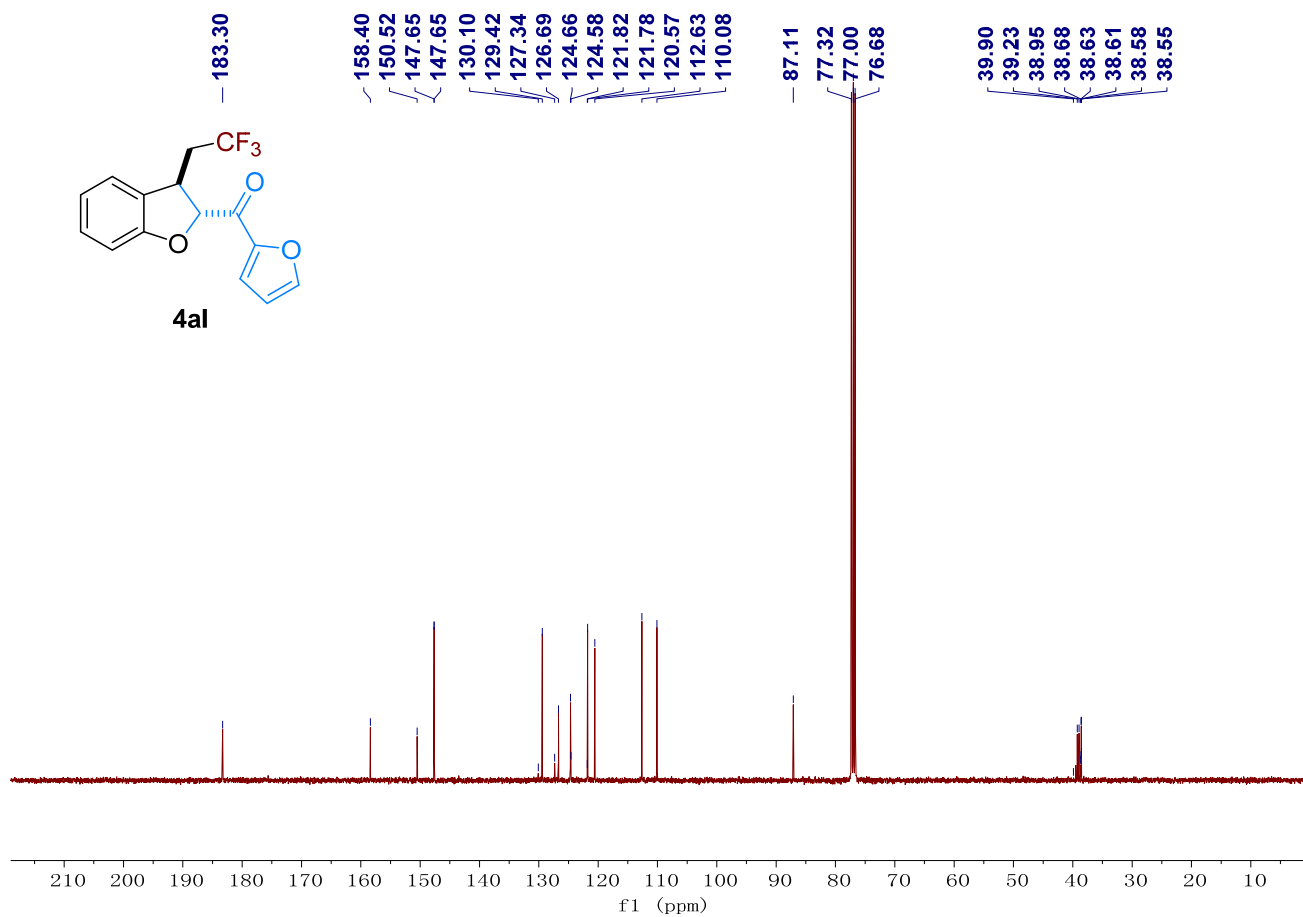

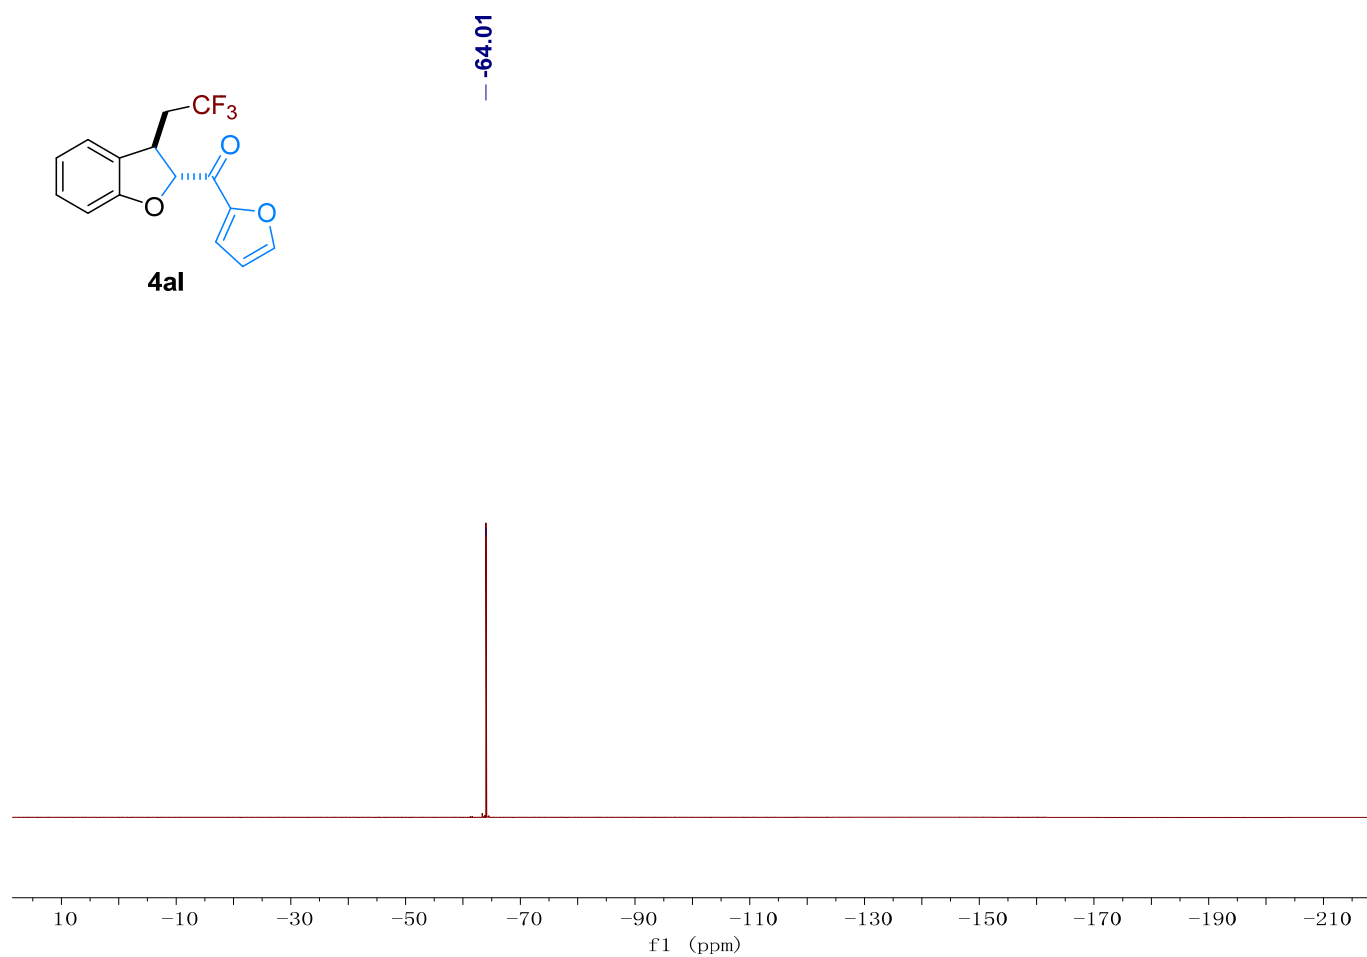

$^1\text{H}$  NMR (400 MHz,  $\text{CDCl}_3$ ),  $^{13}\text{C}$  NMR (100 MHz,  $\text{CDCl}_3$ ) and  $^{19}\text{F}$  NMR (376 MHz,  $\text{CDCl}_3$ ) spectra of product

4am

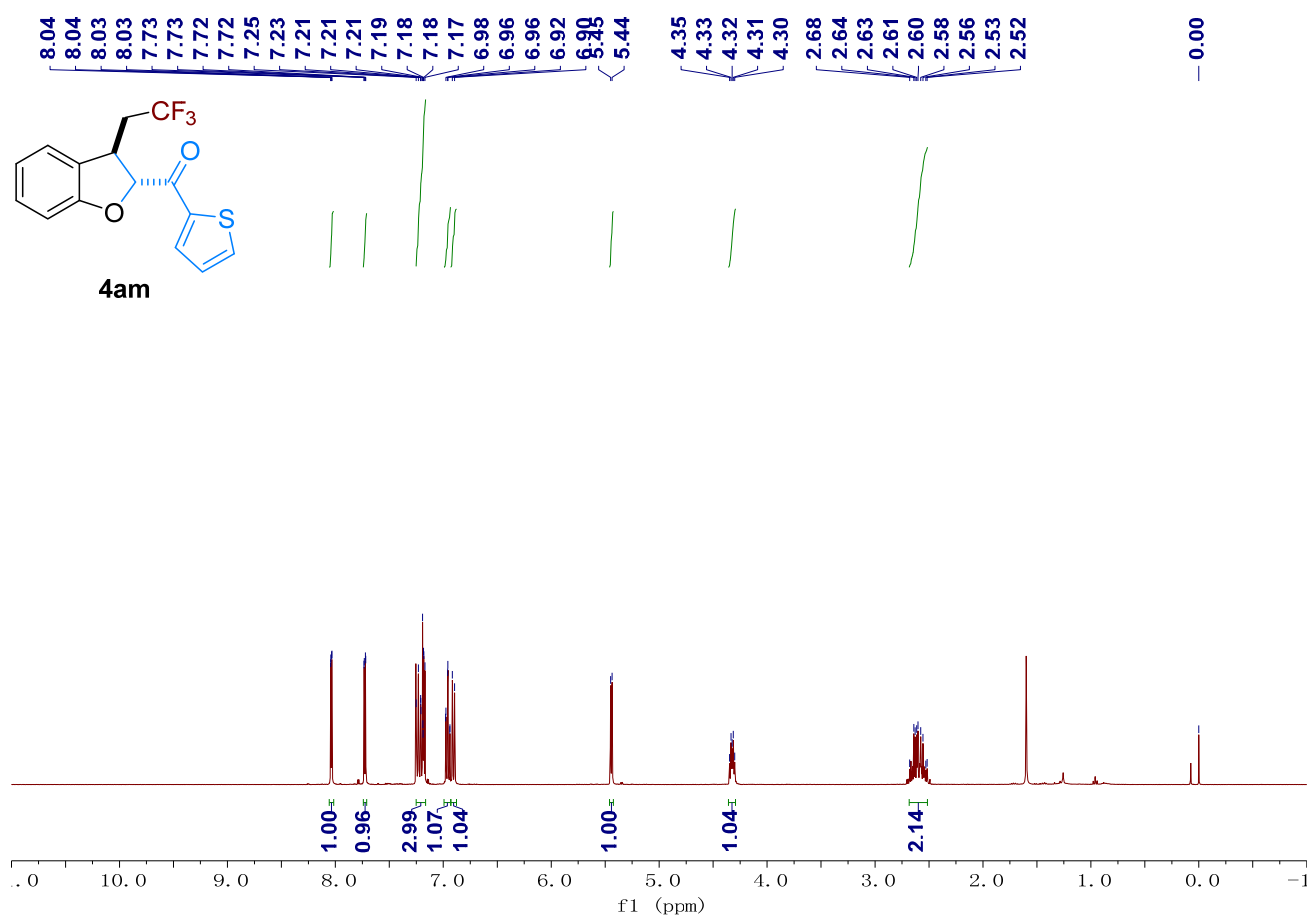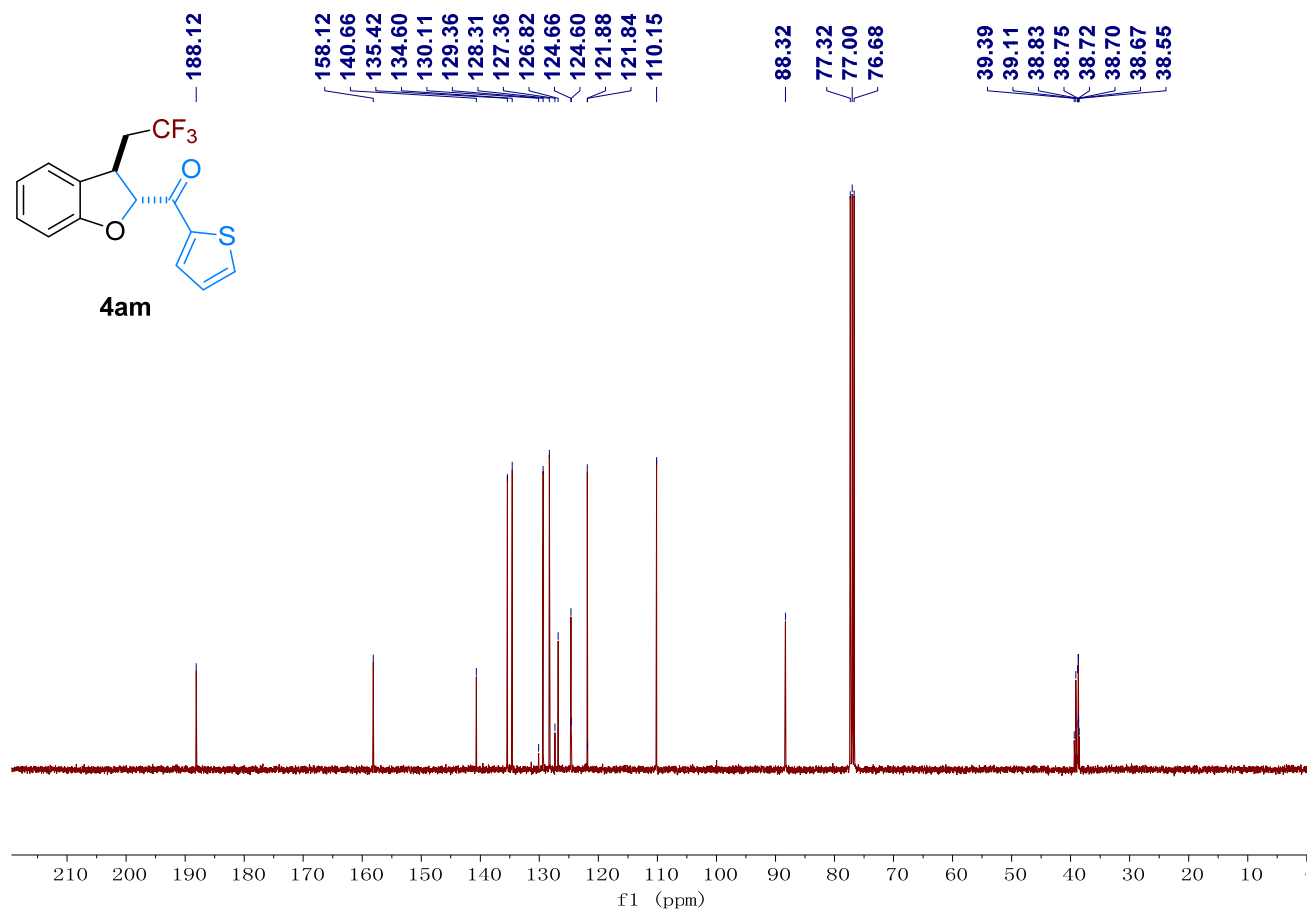

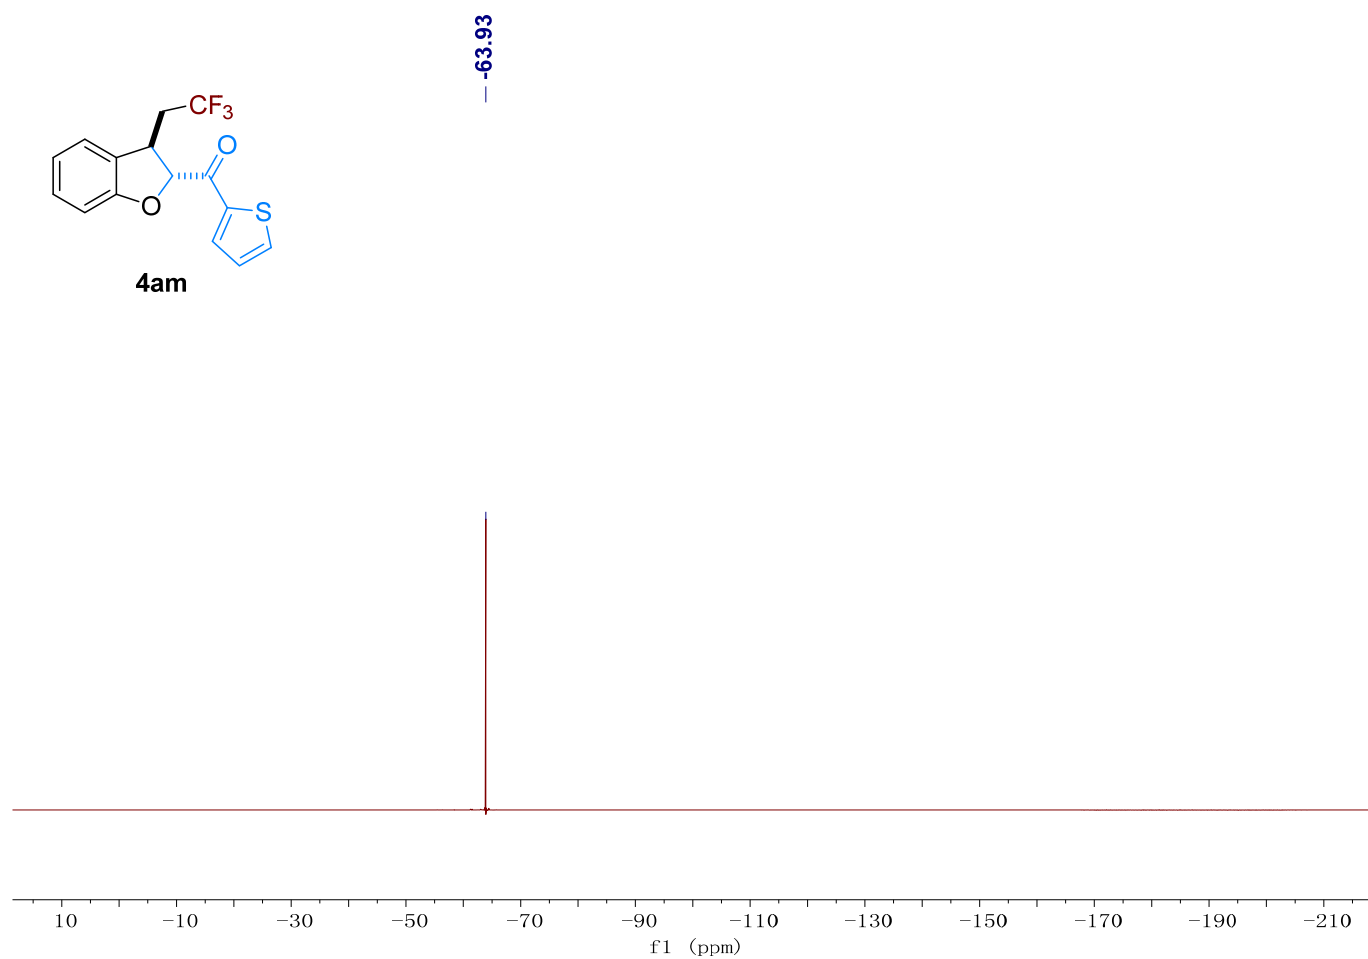



$^1\text{H}$  NMR (400 MHz,  $\text{CDCl}_3$ ),  $^{13}\text{C}$  NMR (100 MHz,  $\text{CDCl}_3$ ) and  $^{19}\text{F}$  NMR (376 MHz,  $\text{CDCl}_3$ ) spectra of product 4ba

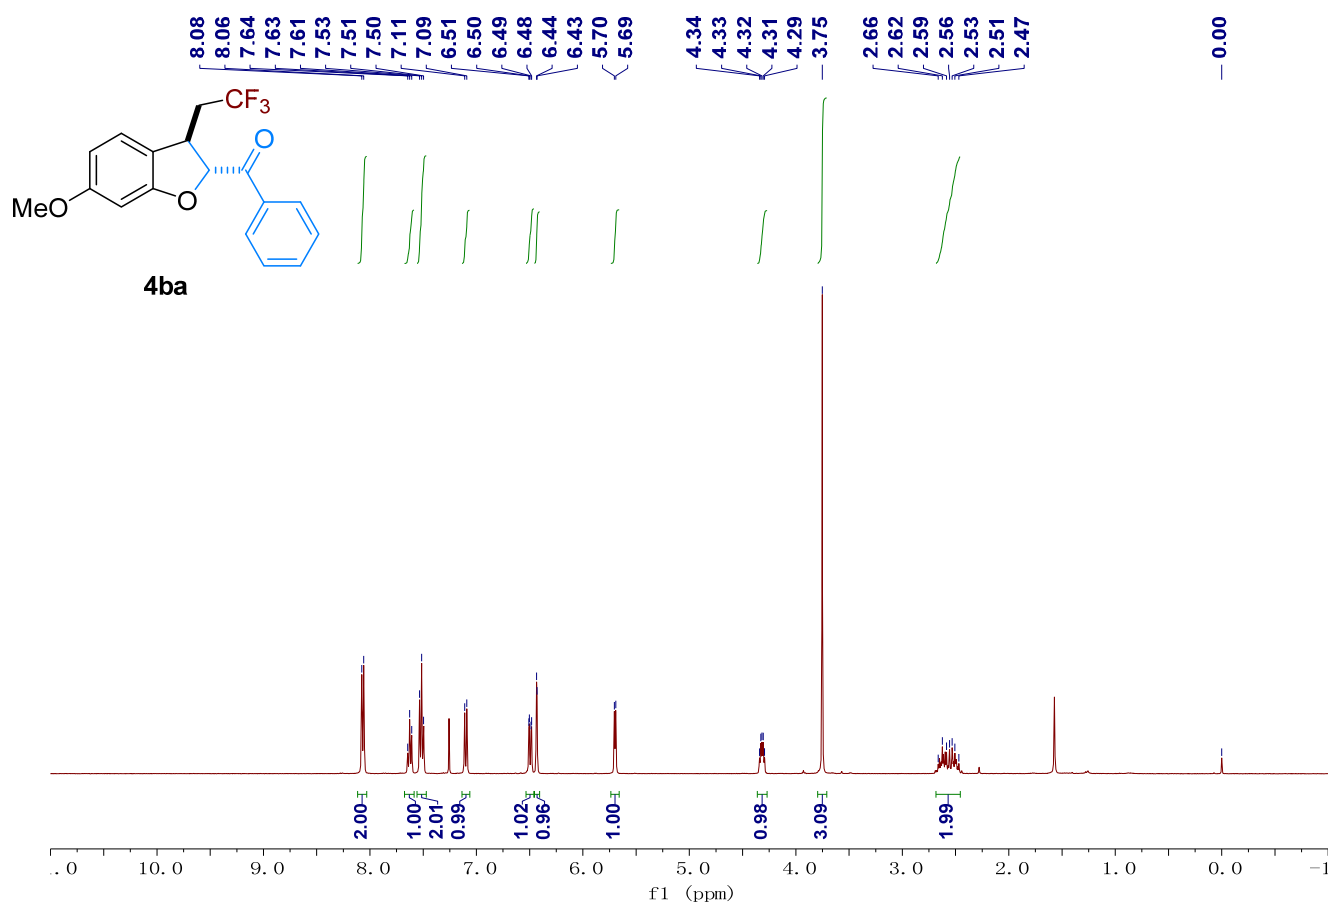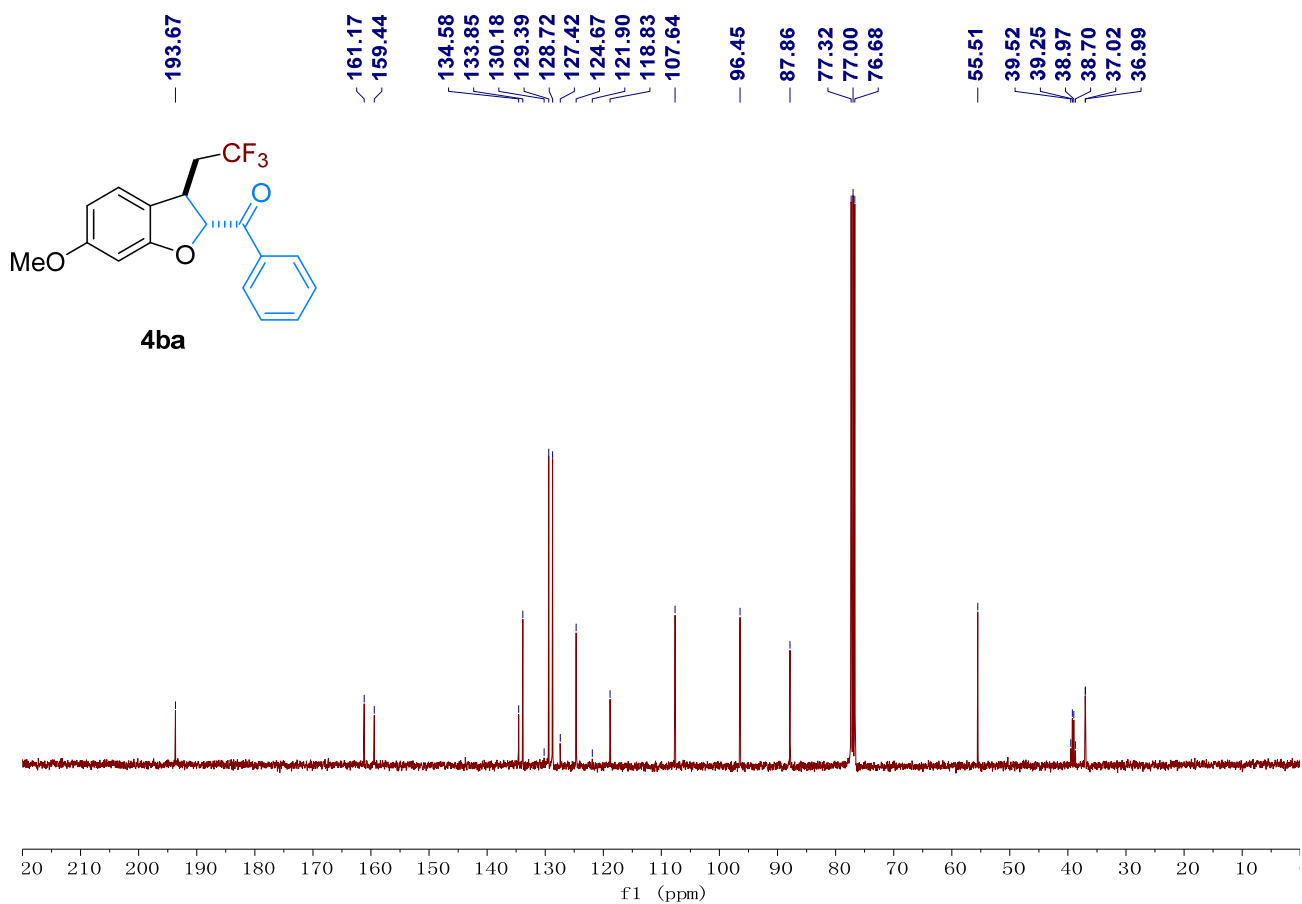

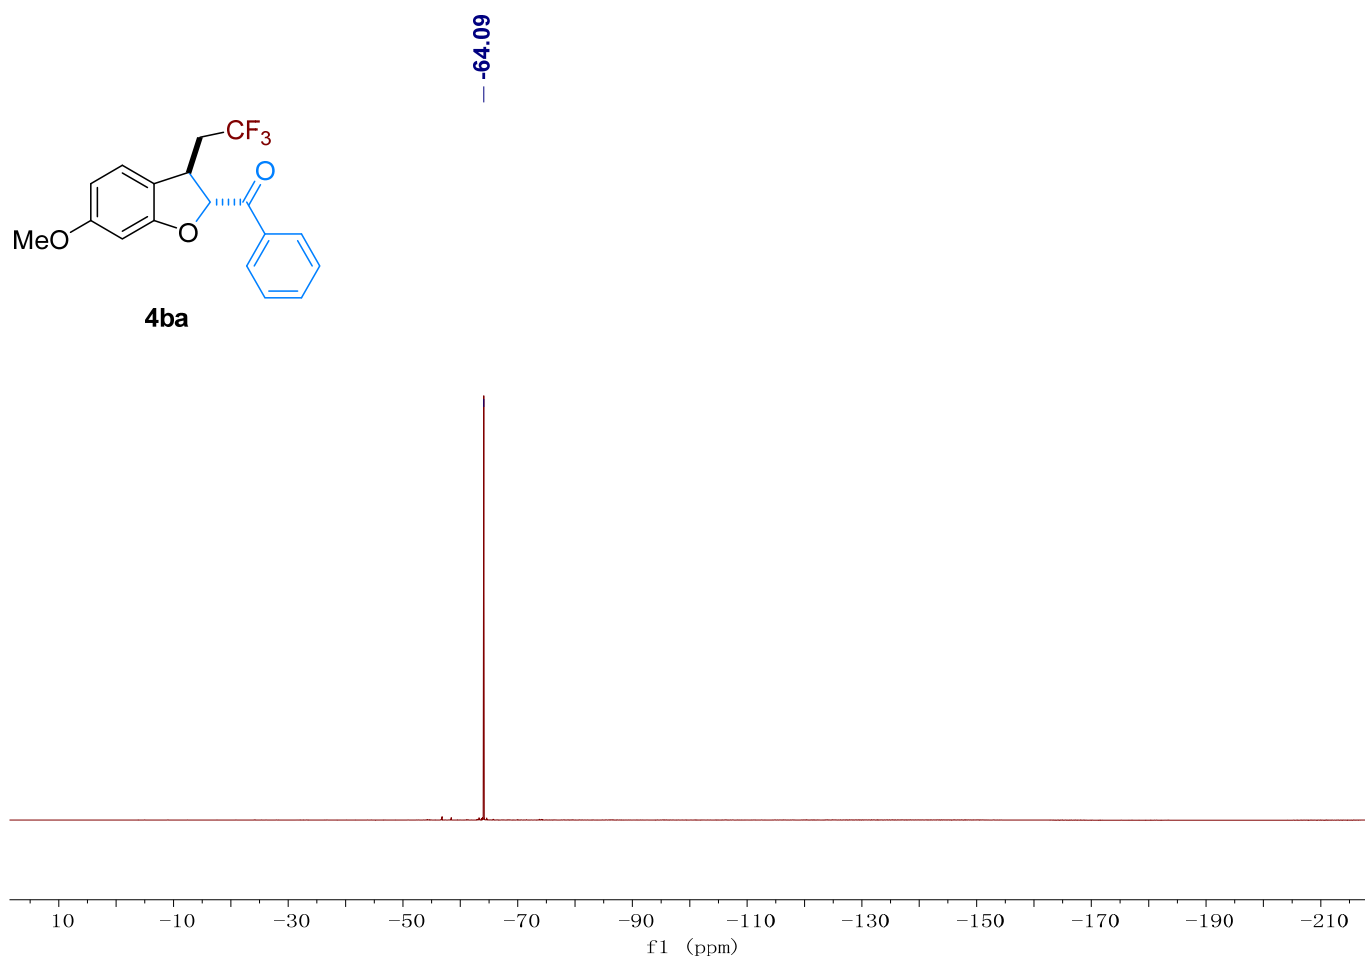

$^1\text{H}$  NMR (400 MHz,  $\text{CDCl}_3$ ),  $^{13}\text{C}$  NMR (100 MHz,  $\text{CDCl}_3$ ) and  $^{19}\text{F}$  NMR (376 MHz,  $\text{CDCl}_3$ ) spectra of product 4ca

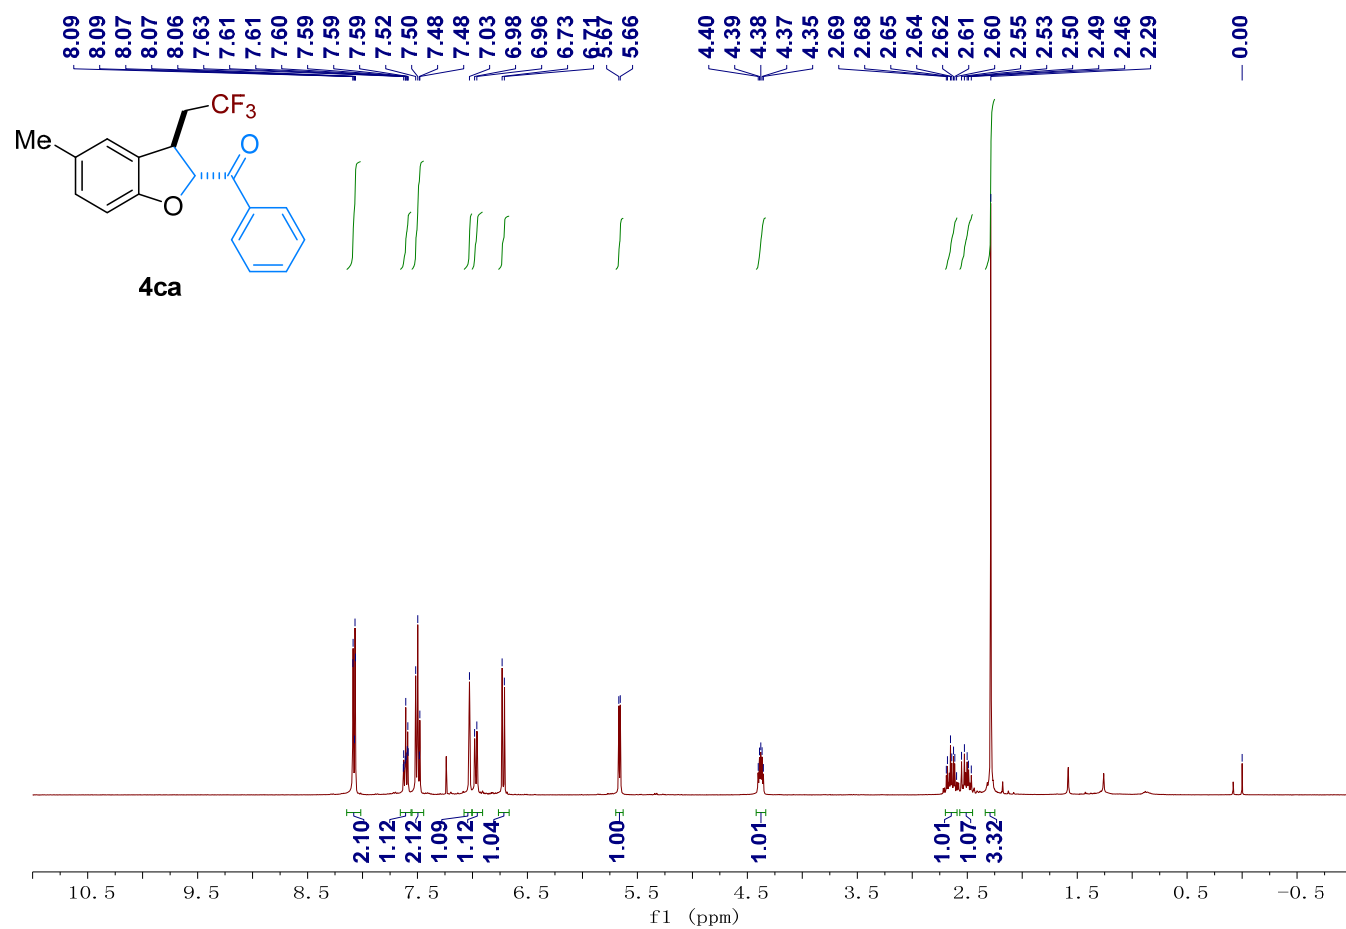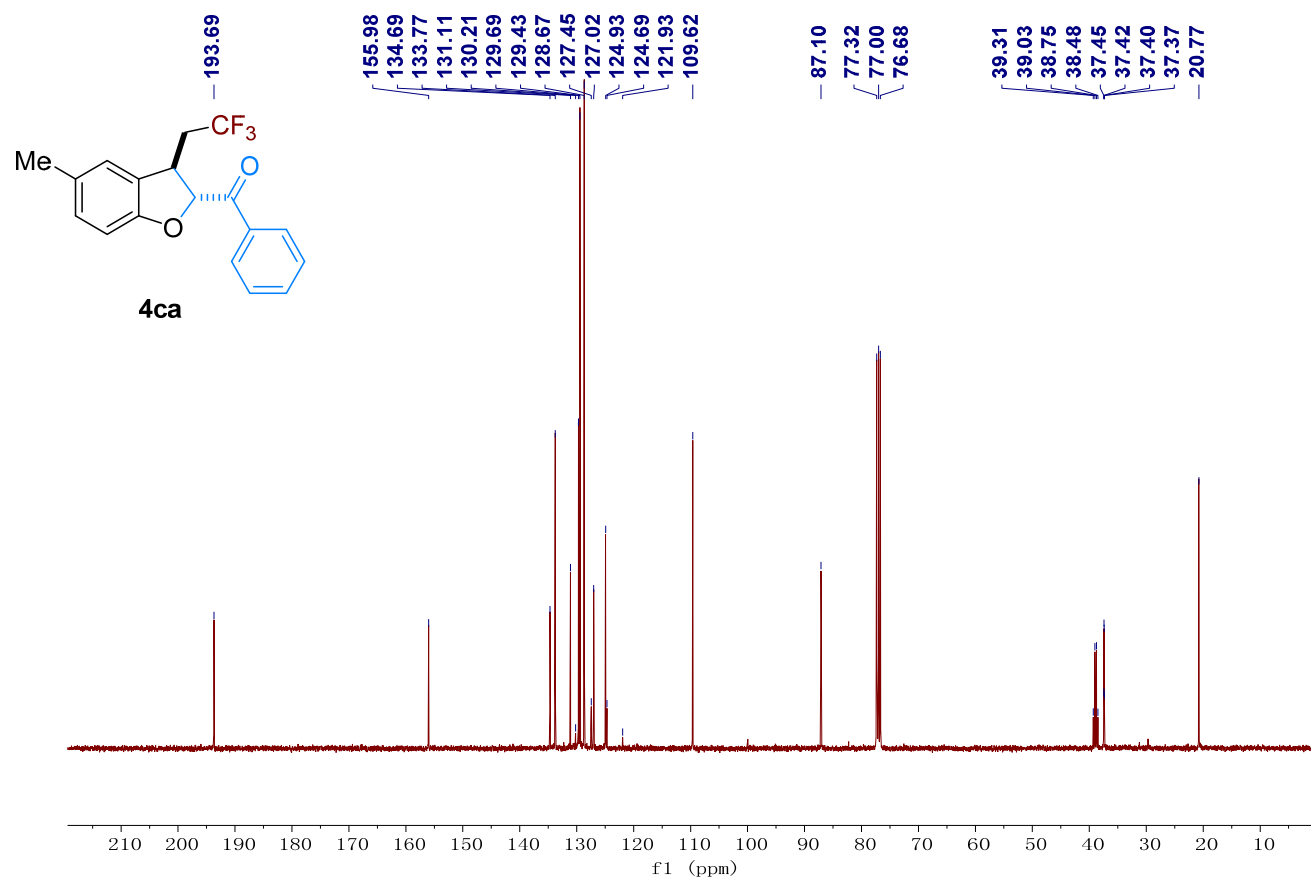

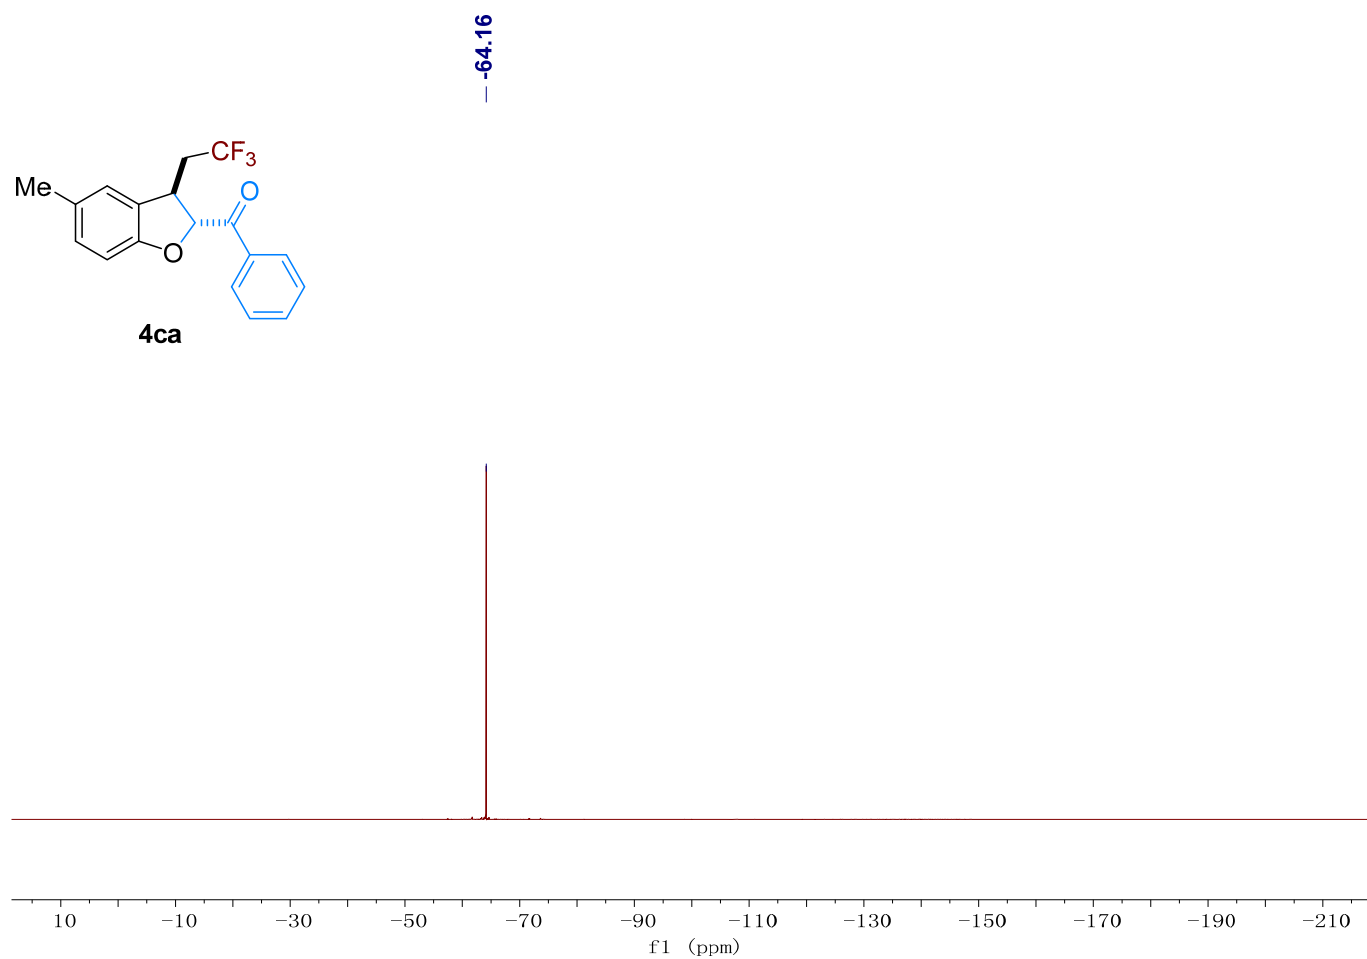

$^1\text{H}$  NMR (400 MHz,  $\text{CDCl}_3$ ),  $^{13}\text{C}$  NMR (100 MHz,  $\text{CDCl}_3$ ) and  $^{19}\text{F}$  NMR (376 MHz,  $\text{CDCl}_3$ ) spectra of product 4da

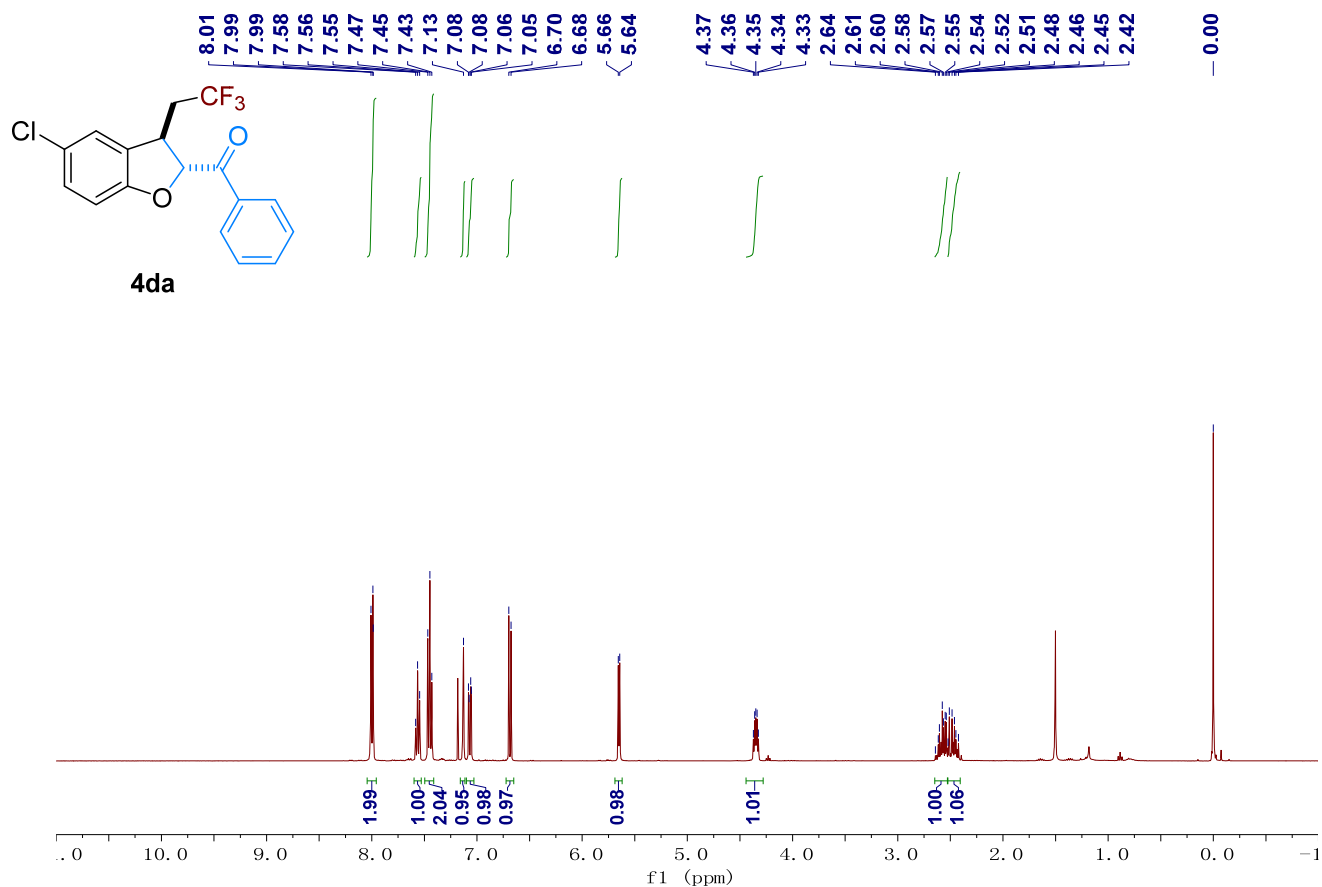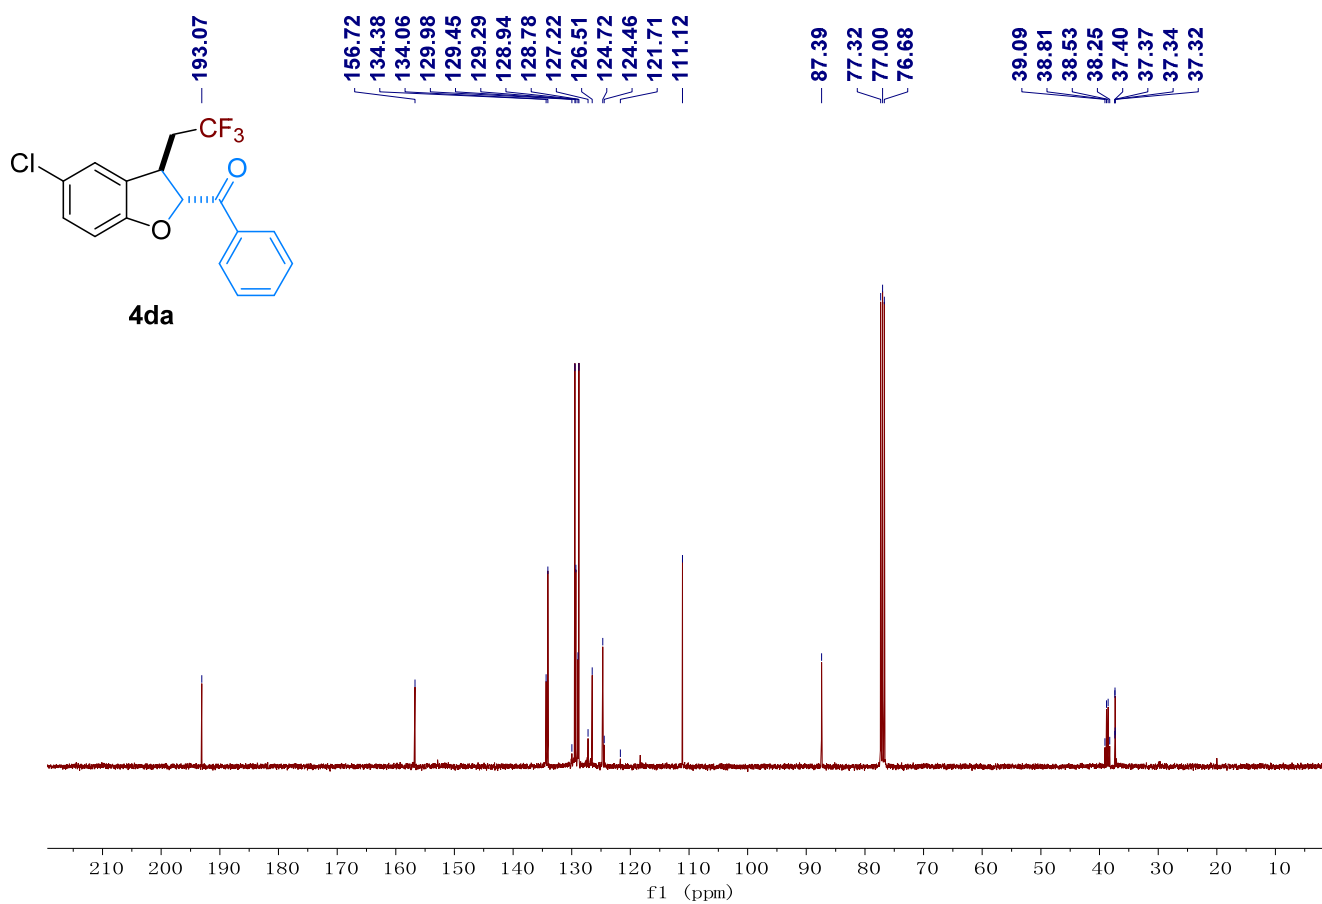

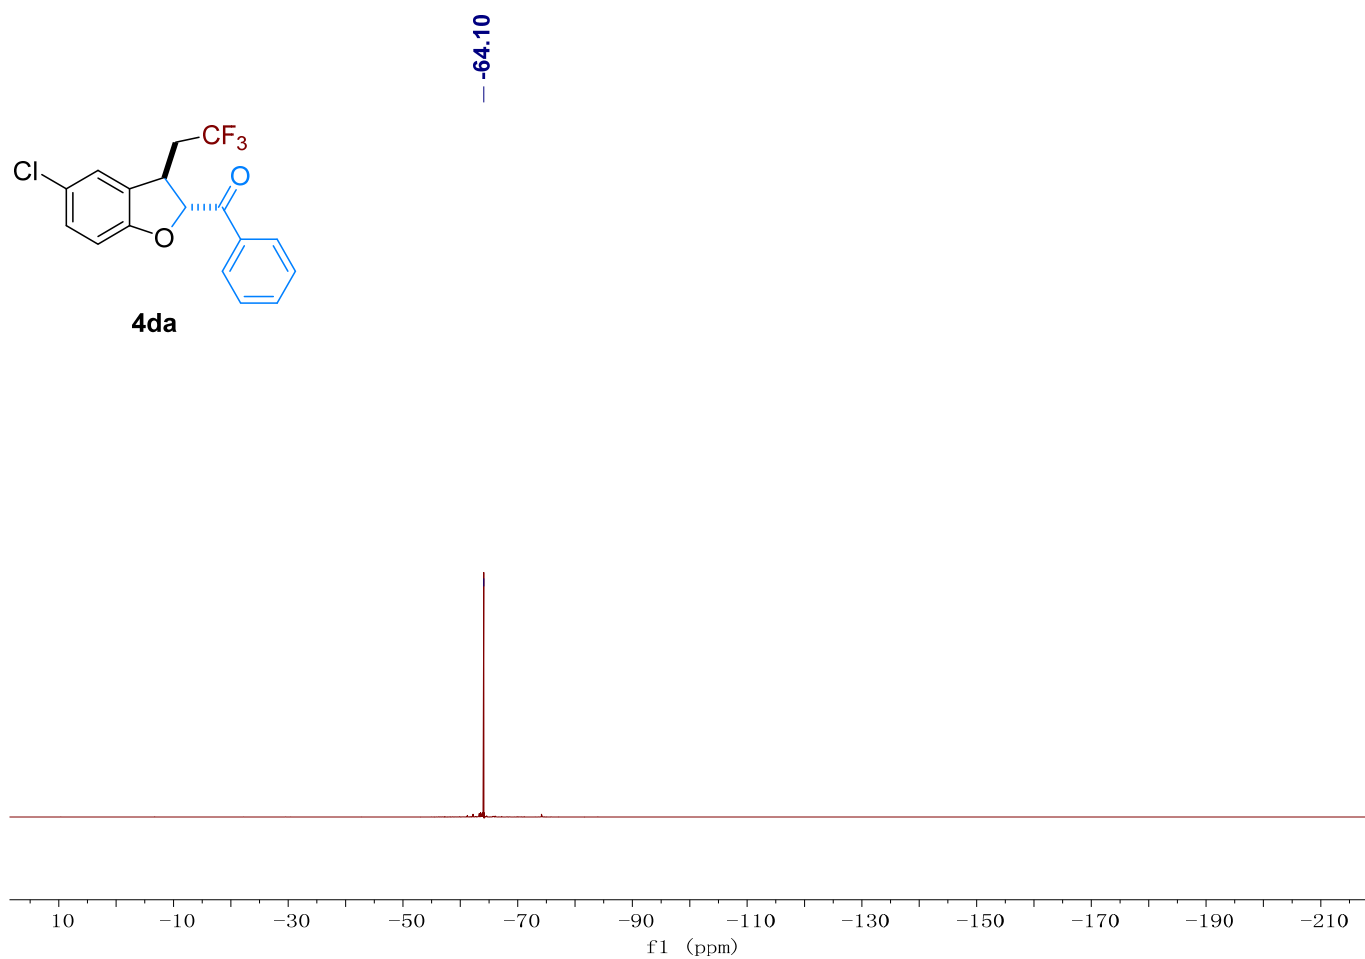

$^1\text{H}$  NMR (400 MHz,  $\text{CDCl}_3$ ),  $^{13}\text{C}$  NMR (100 MHz,  $\text{CDCl}_3$ ) and  $^{19}\text{F}$  NMR (376 MHz,  $\text{CDCl}_3$ ) spectra of product 4ea

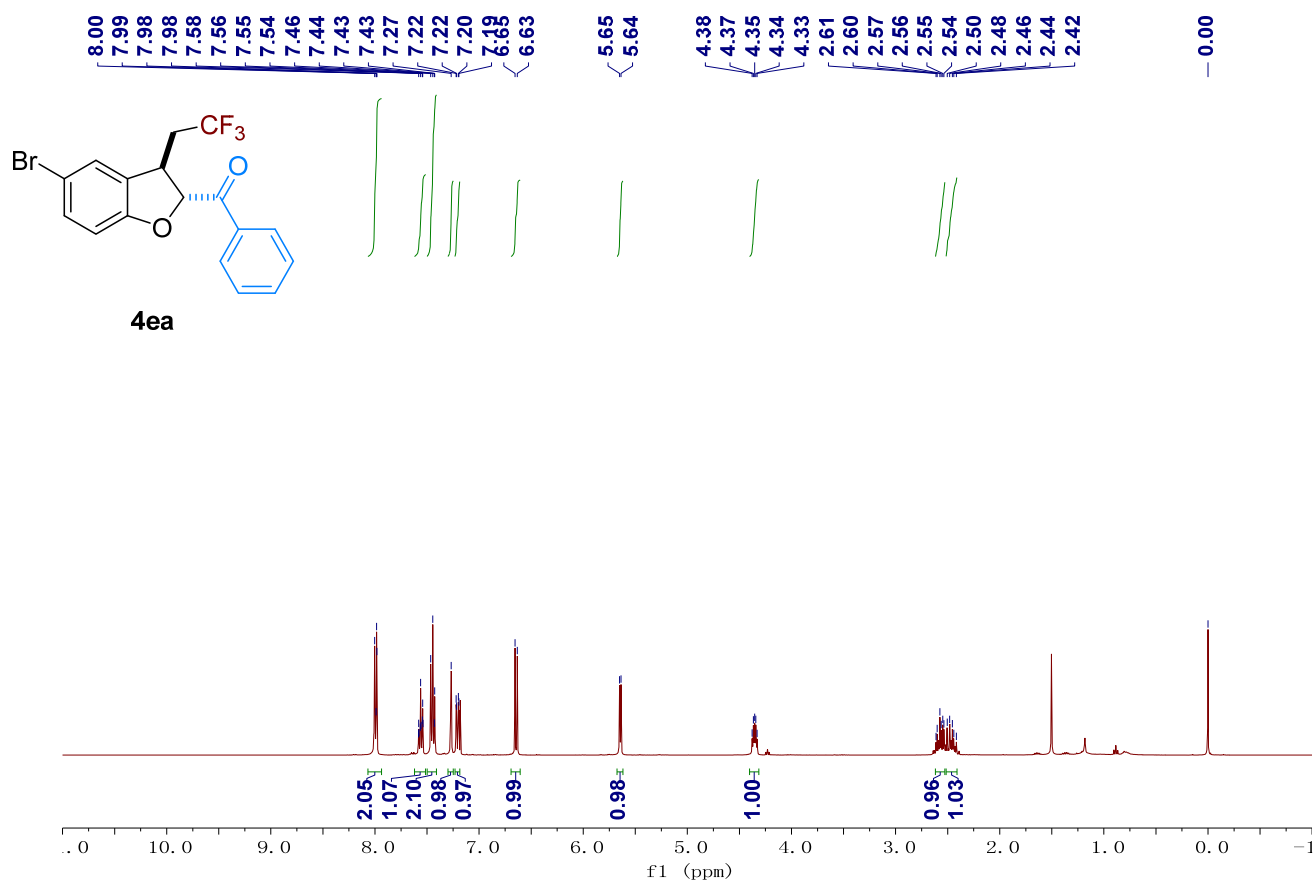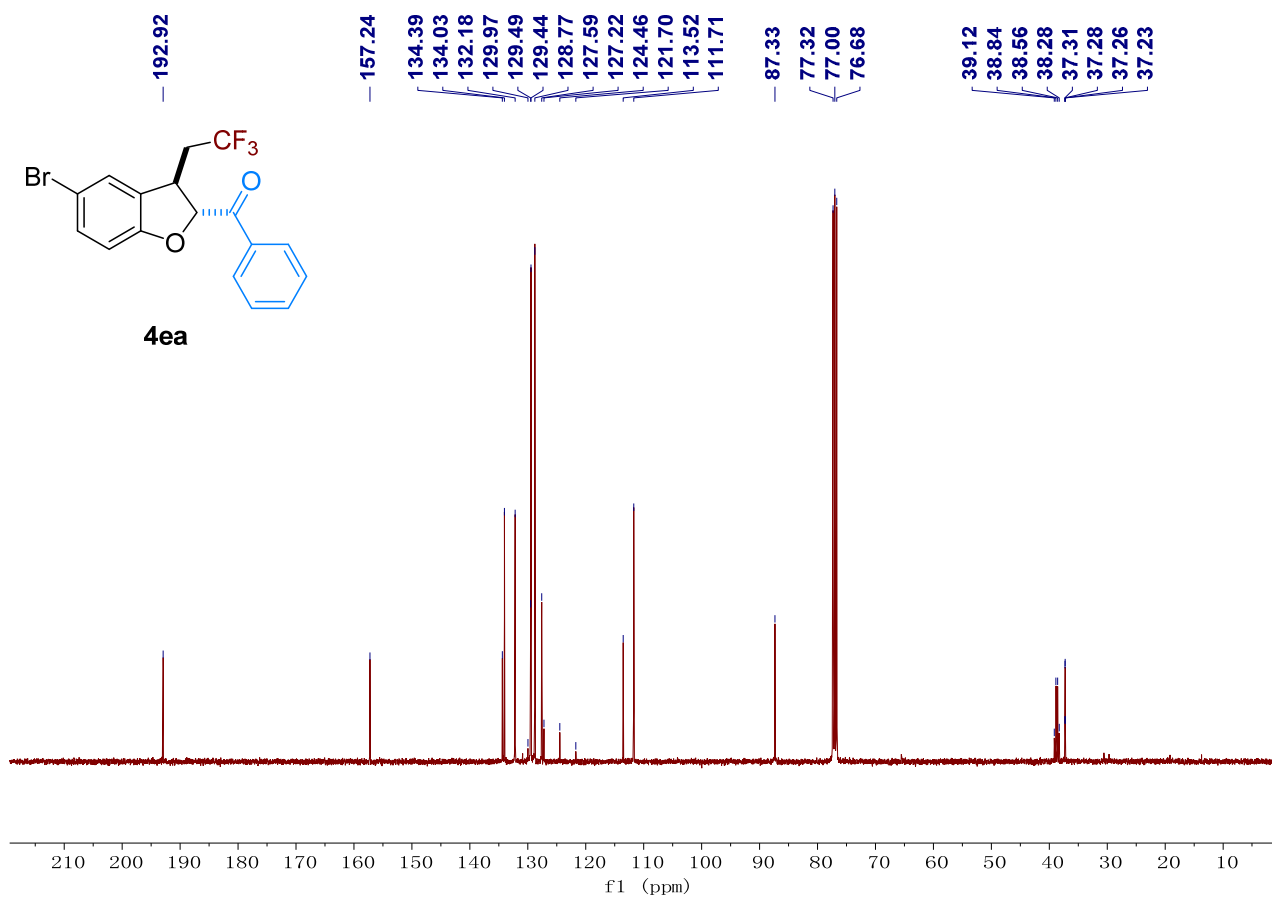

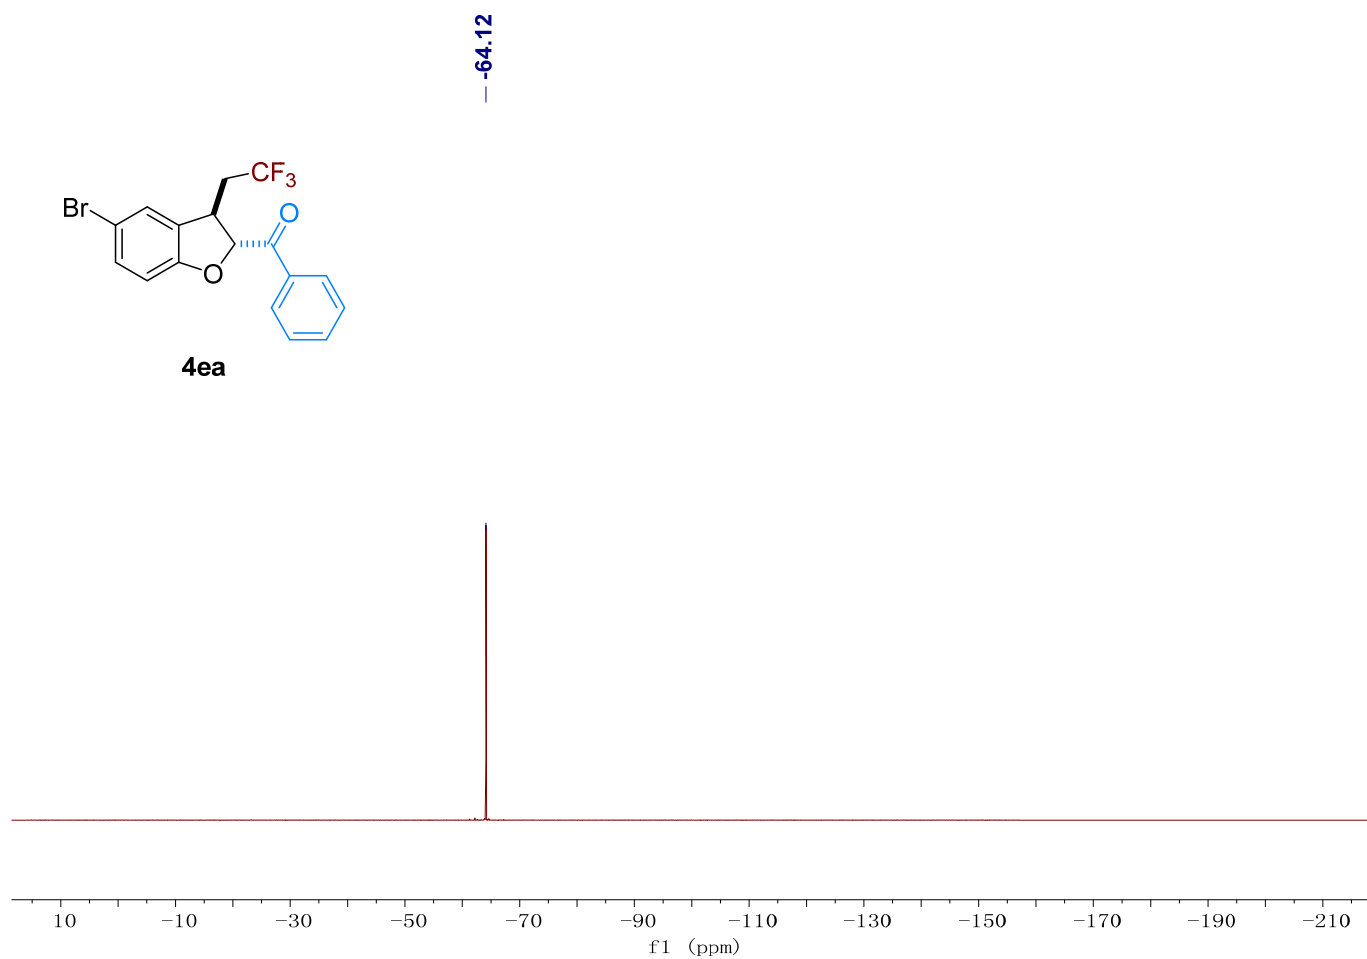



$^1\text{H}$  NMR (400 MHz,  $\text{CDCl}_3$ ),  $^{13}\text{C}$  NMR (100 MHz,  $\text{CDCl}_3$ ) and  $^{19}\text{F}$  NMR (376 MHz,  $\text{CDCl}_3$ ) spectra of product 4fa

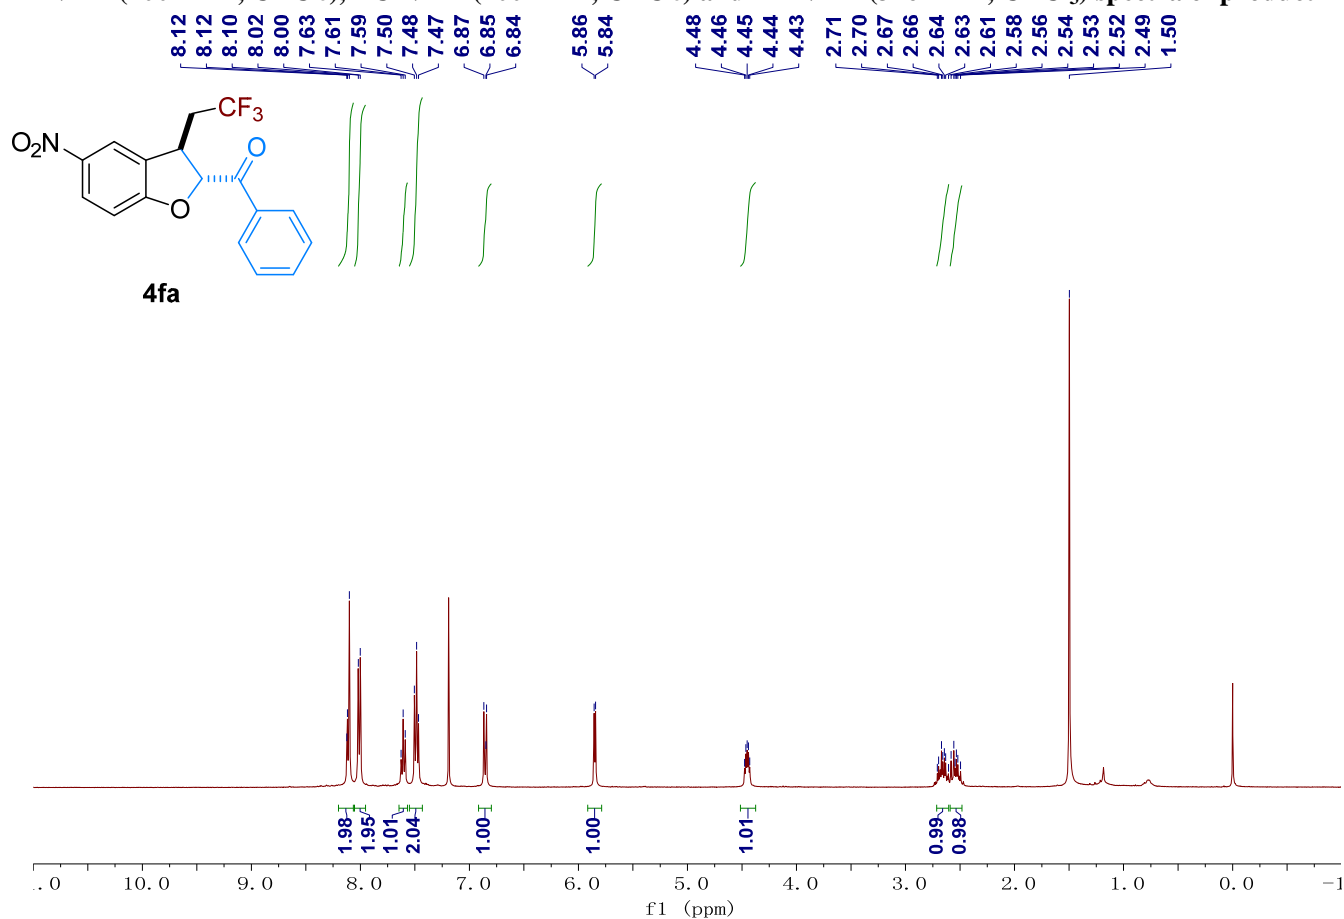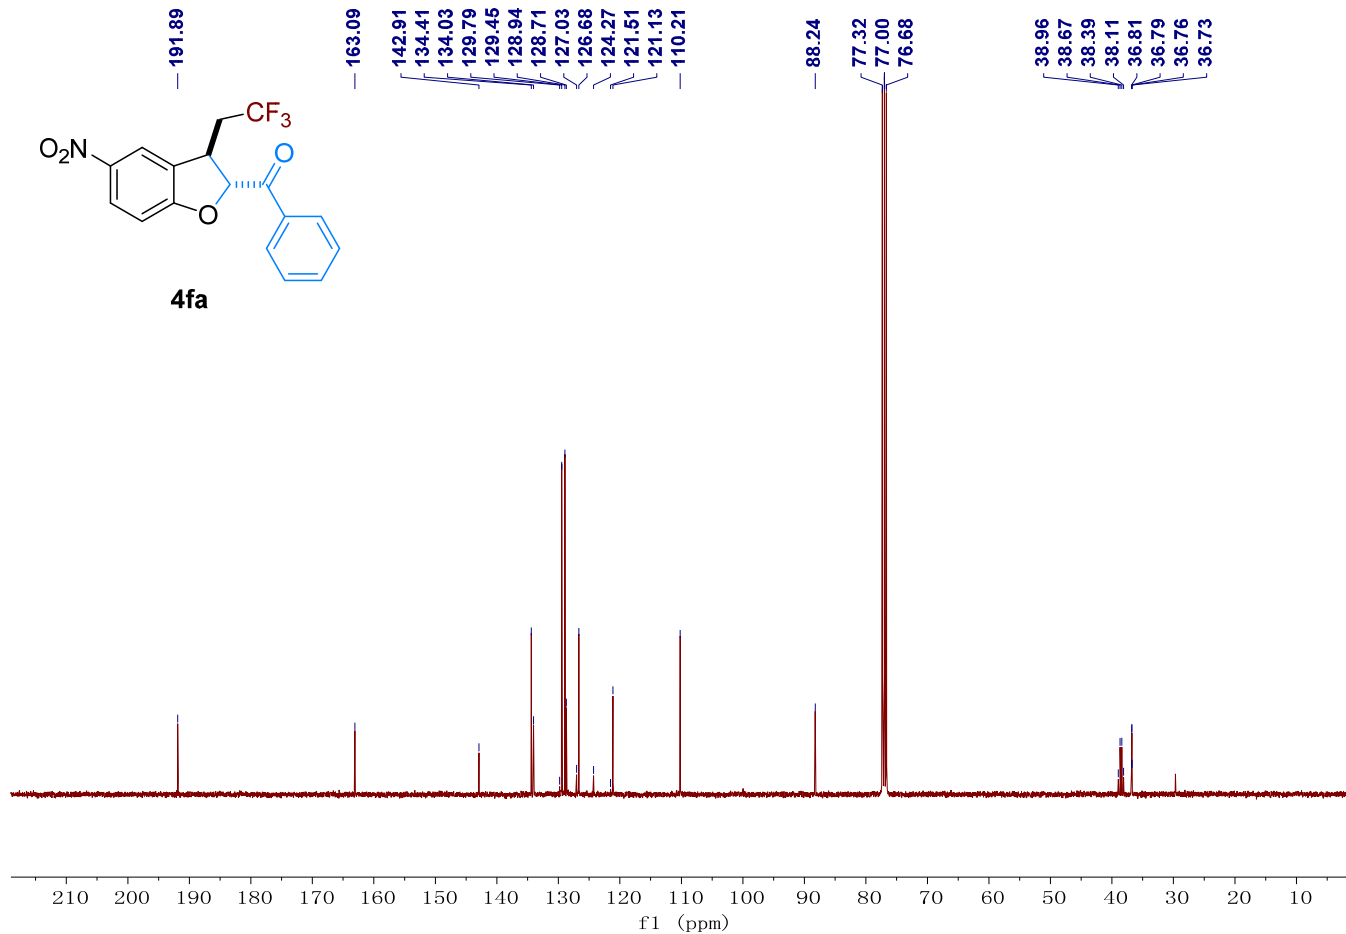

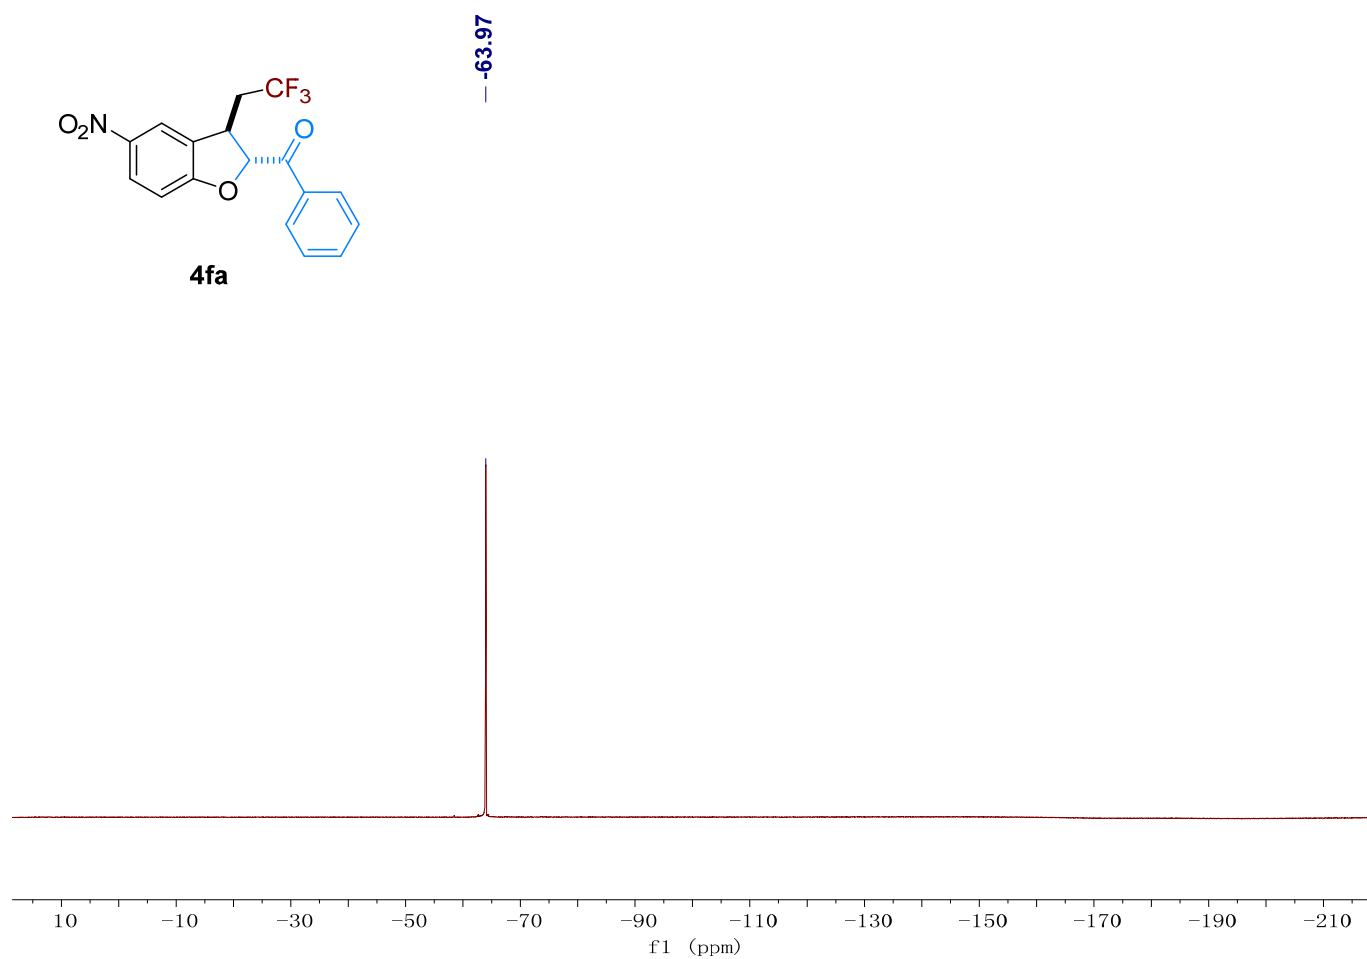

$^1\text{H}$  NMR (400 MHz,  $\text{CDCl}_3$ ),  $^{13}\text{C}$  NMR (100 MHz,  $\text{CDCl}_3$ ) and  $^{19}\text{F}$  NMR (376 MHz,  $\text{CDCl}_3$ ) spectra of product 4ga

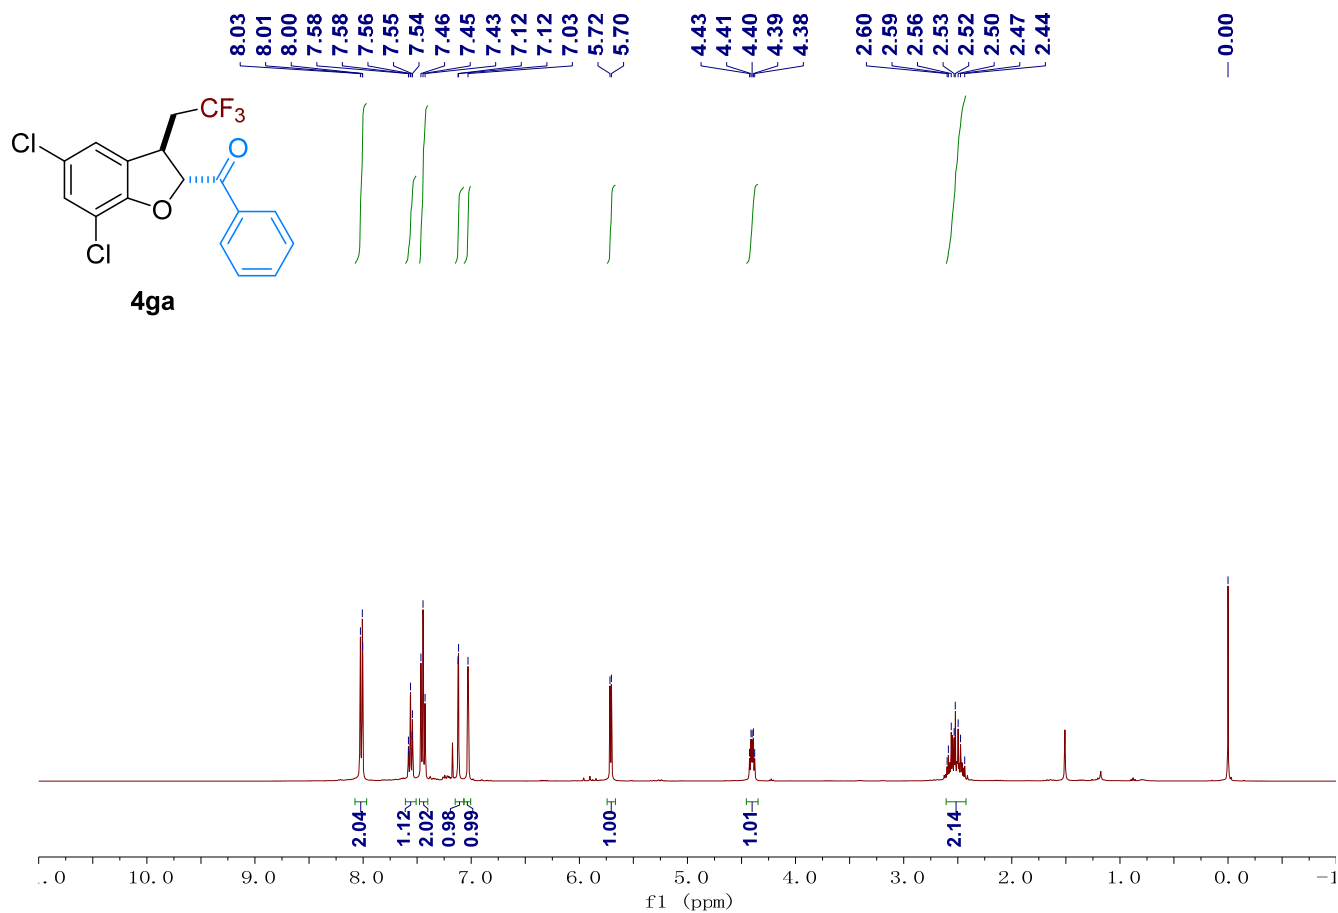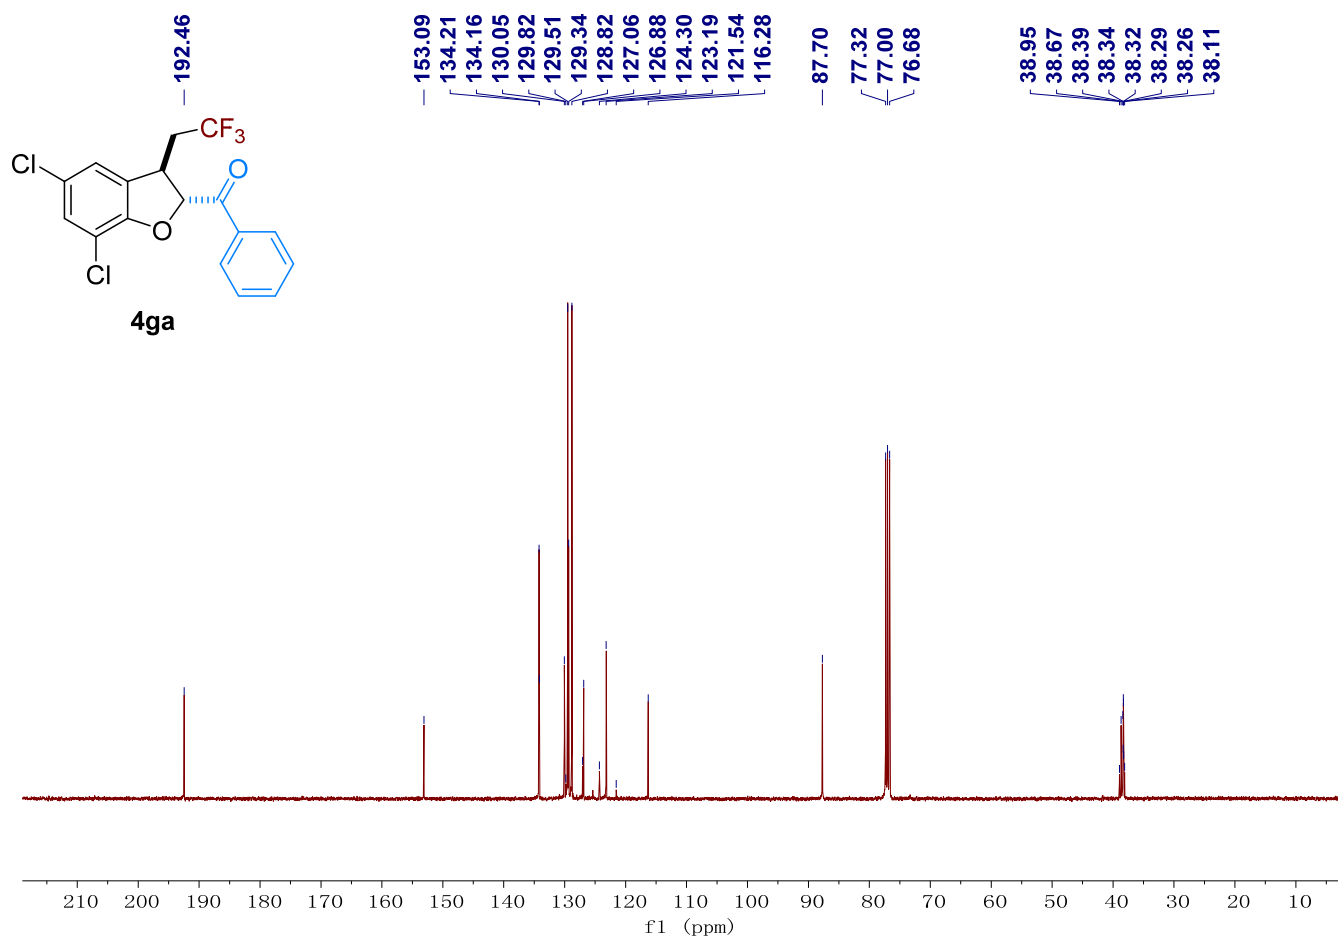

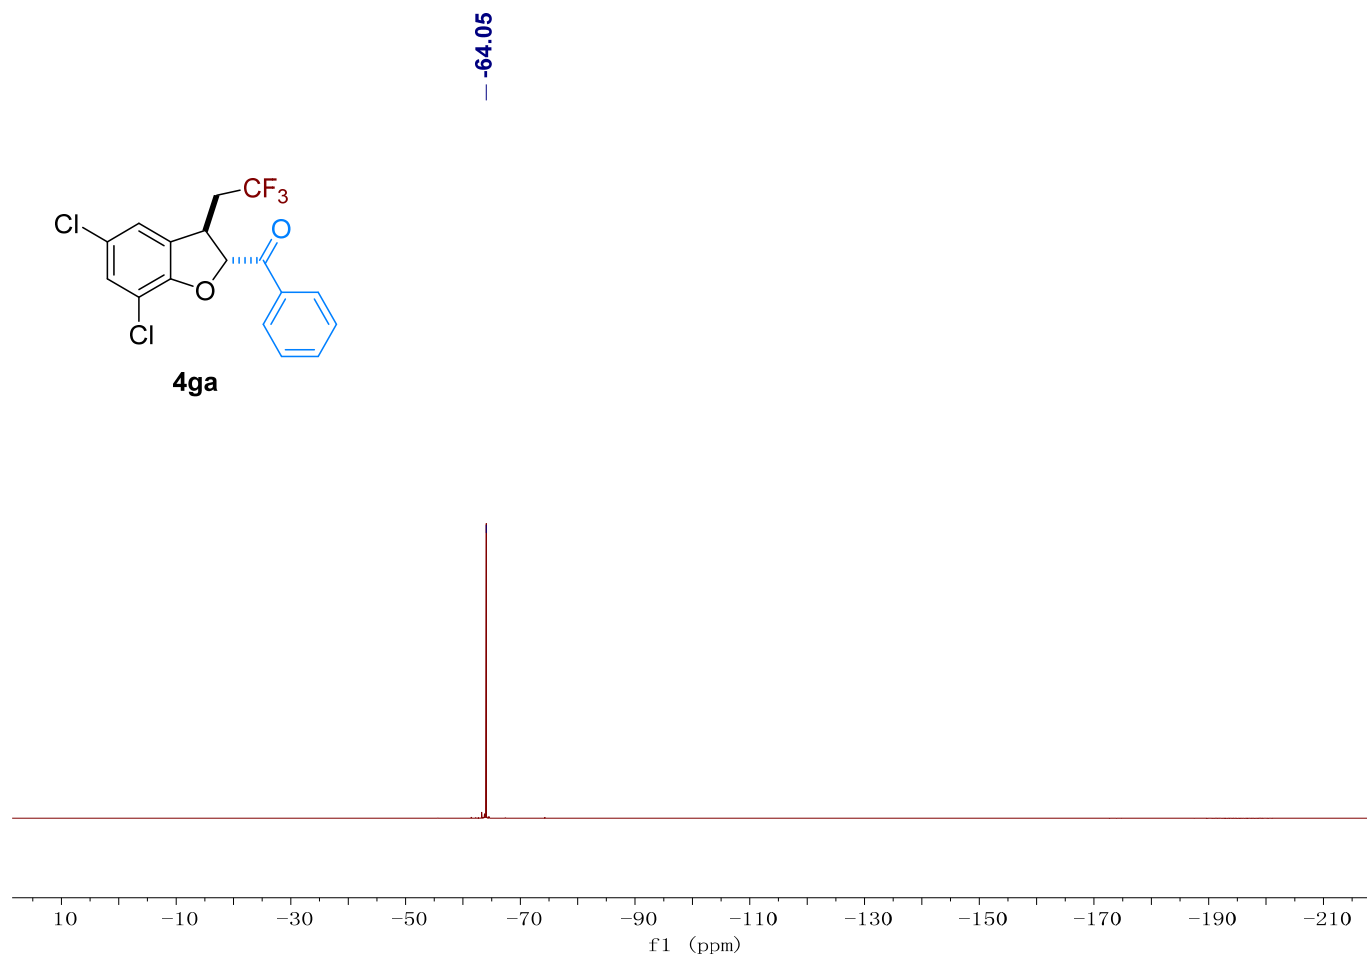

$^1\text{H}$  NMR (400 MHz,  $\text{CDCl}_3$ ),  $^{13}\text{C}$  NMR (100 MHz,  $\text{CDCl}_3$ ) and  $^{19}\text{F}$  NMR (376 MHz,  $\text{CDCl}_3$ ) spectra of product 4ha

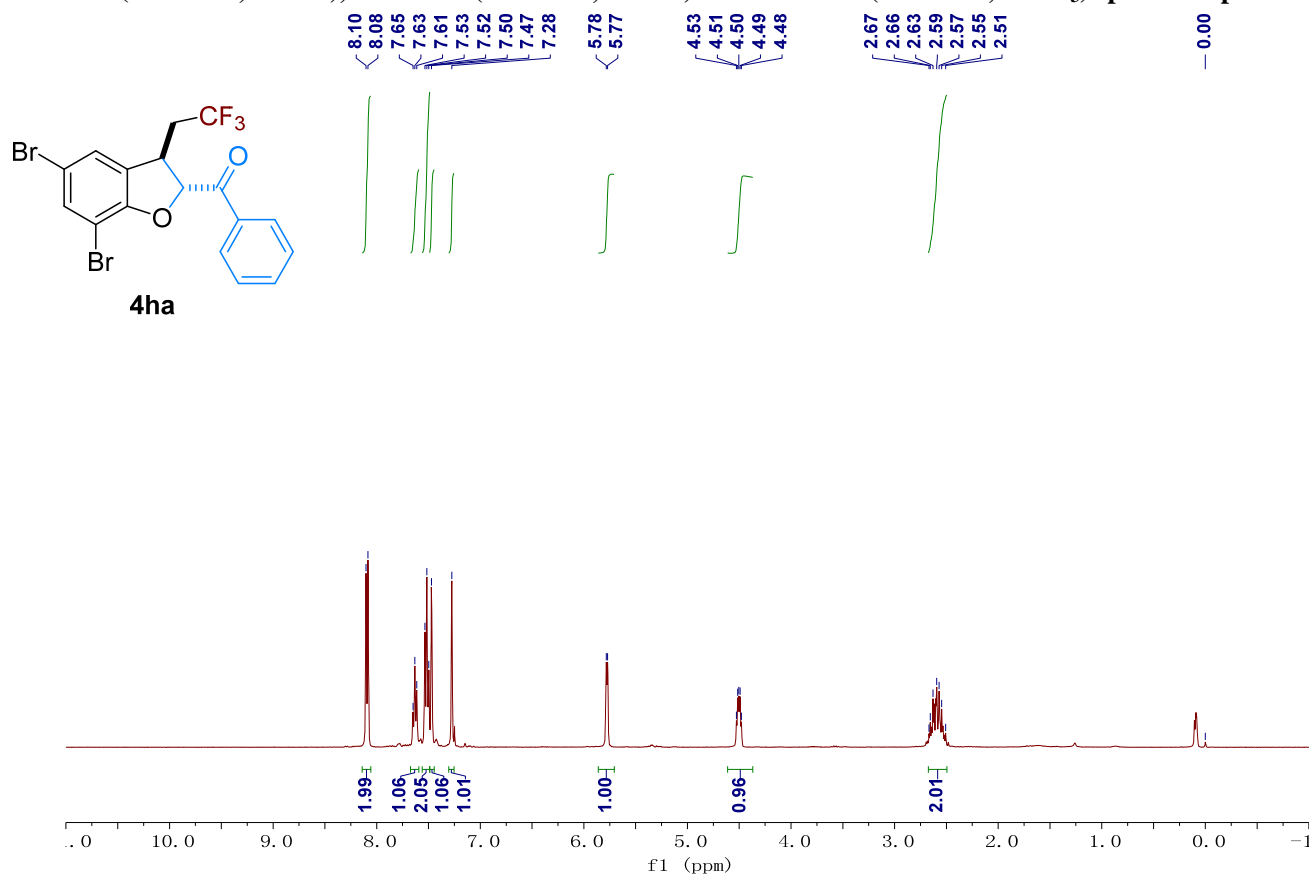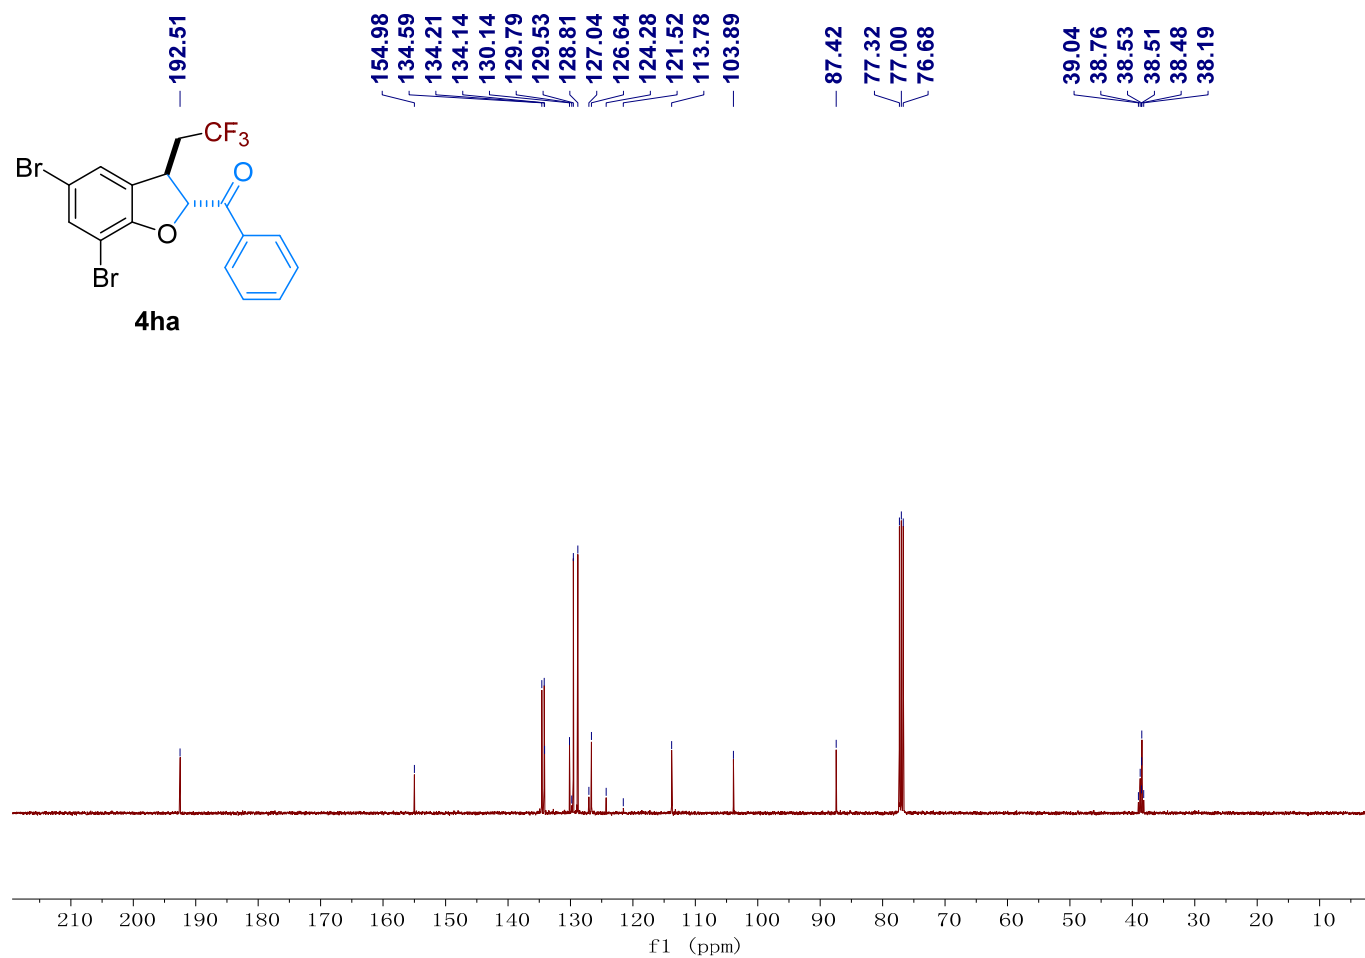

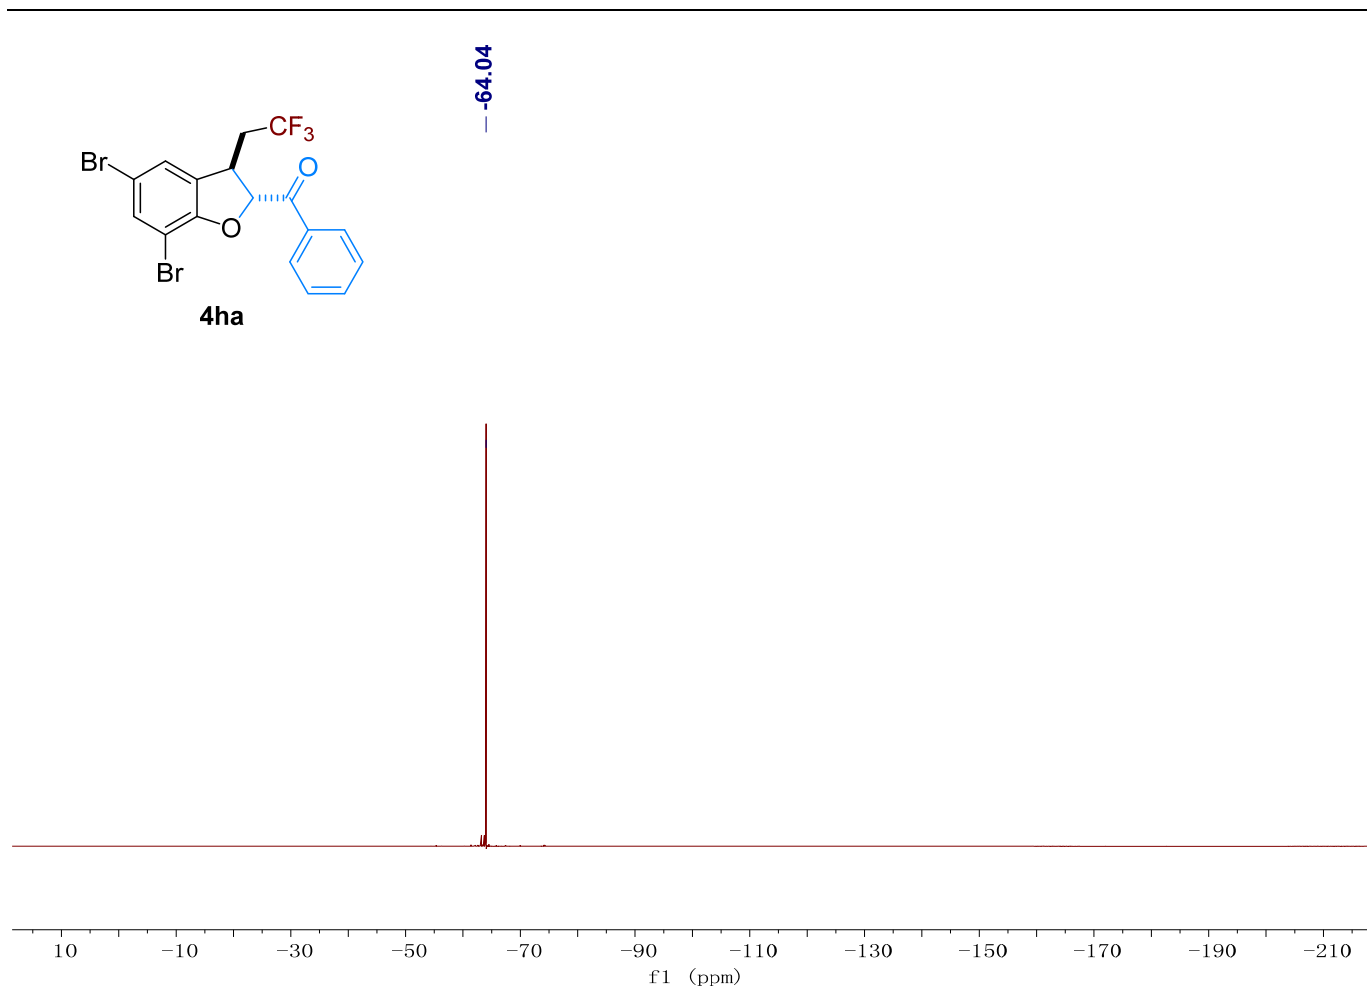

$^1\text{H}$  NMR (400 MHz,  $\text{CDCl}_3$ ),  $^{13}\text{C}$  NMR (100 MHz,  $\text{CDCl}_3$ ) spectra of product 7

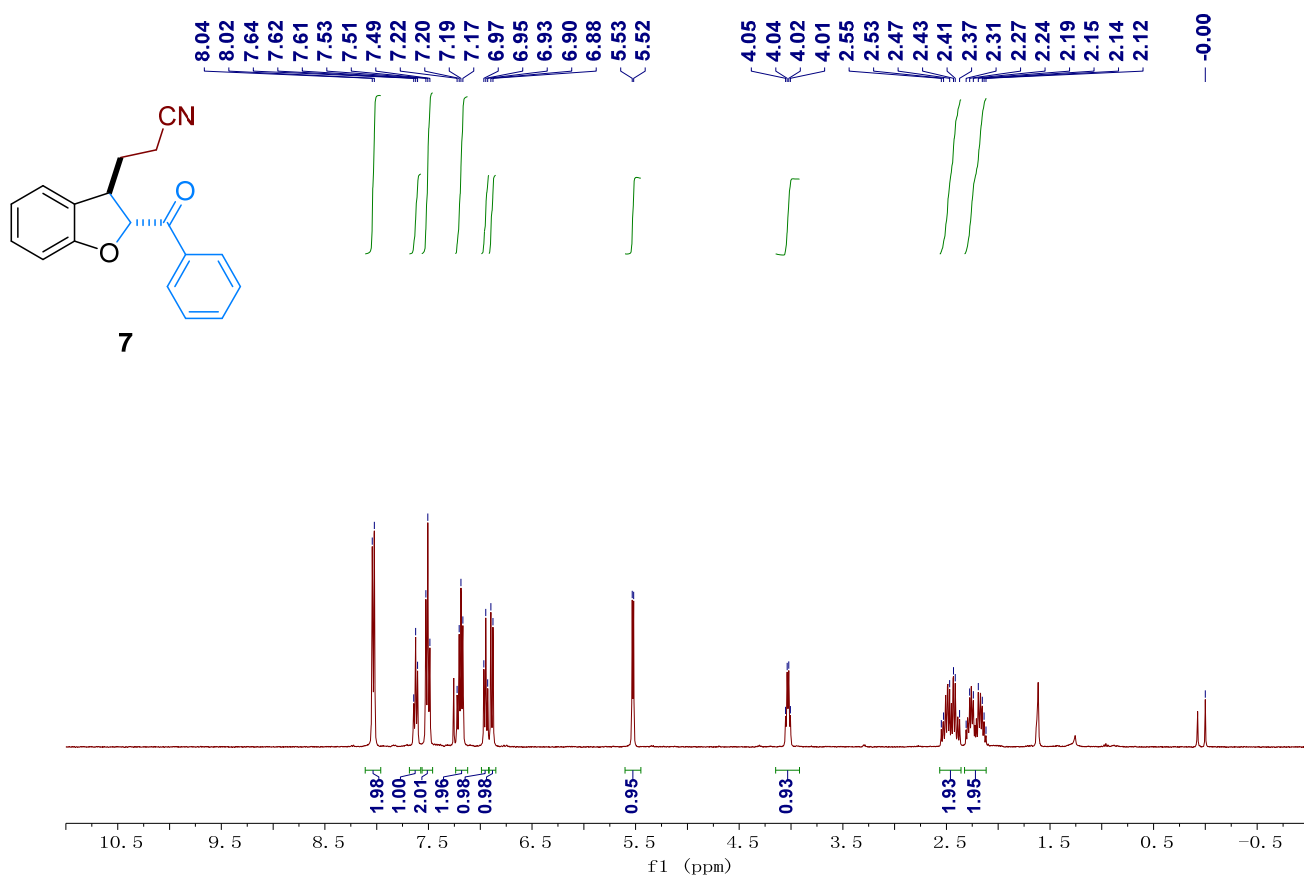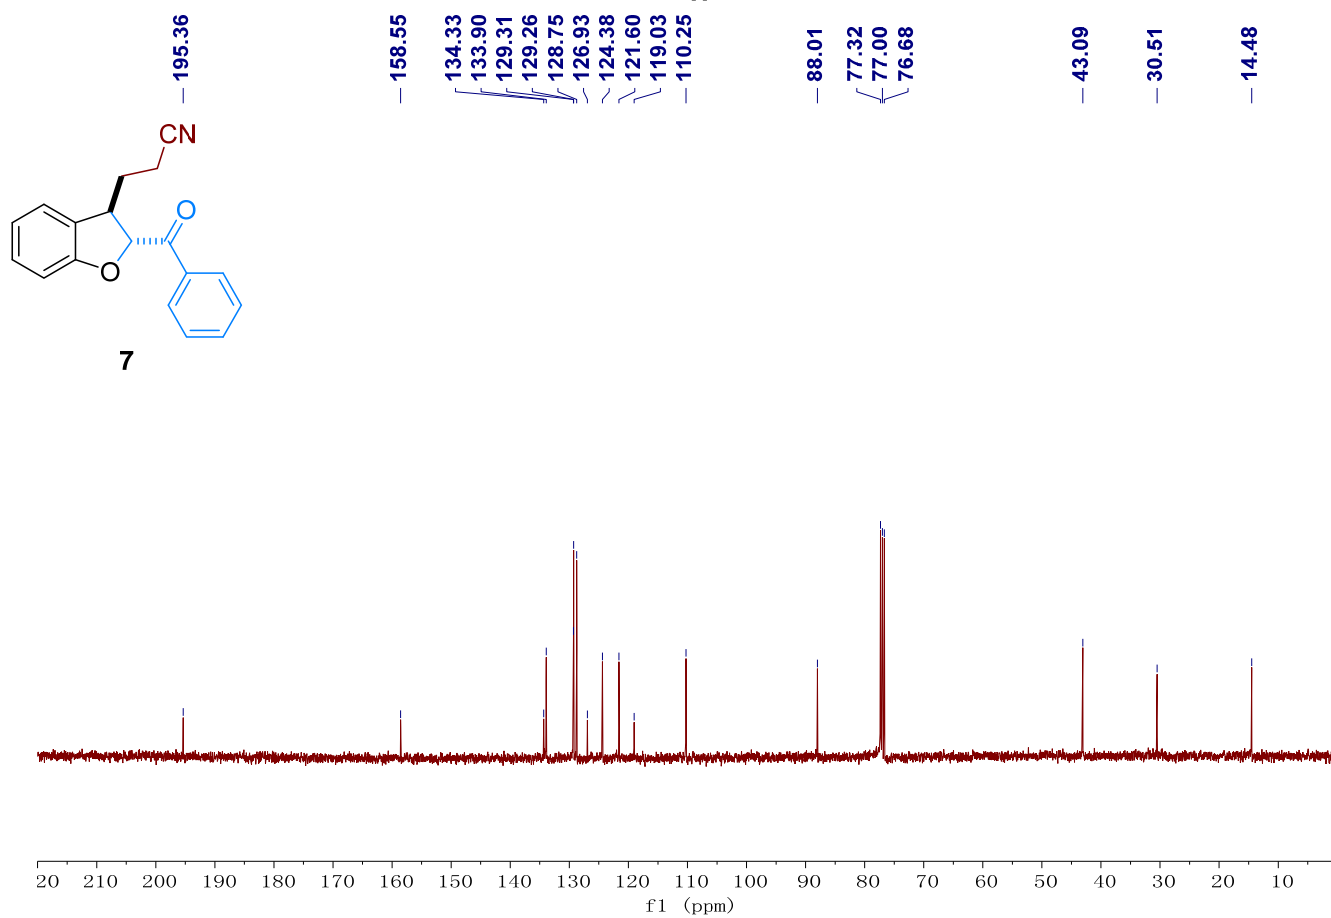

## 7. Copy of HPLC Chromatograms

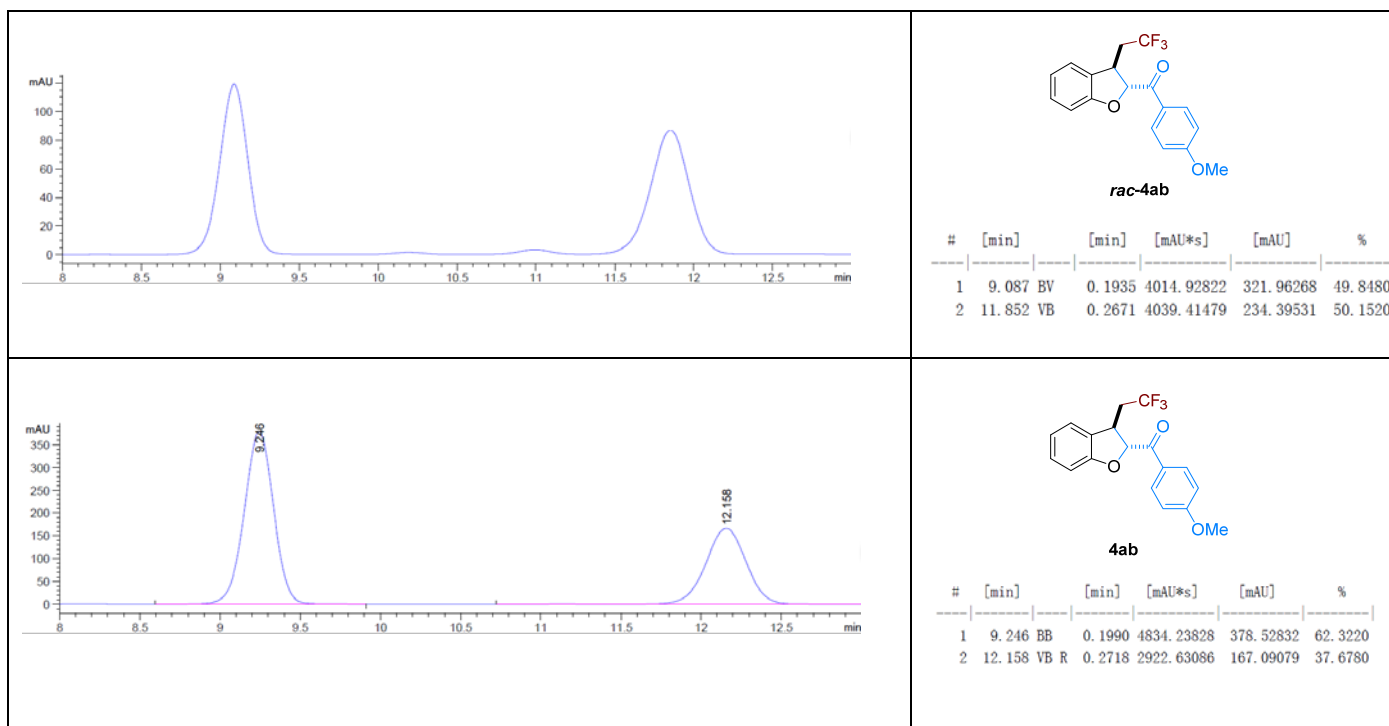

Supplement: c9cc00727j1.pdf [file c9cc00727j1.pdf]
